# Supplementary material for: First total synthesis of cyclodepsipeptides clavatustide A and B and their enantiomers
Source: Royal Society of Chemistry journal article supplement (doi:10.1039/c6ra08861a), 2016-01-01
Supplement: c6ra08861a1.pdf [file c6ra08861a1.pdf]

## Supporting Information

### First total Synthesis of Cyclodepsipeptides Clavatustide A and B and their enantiomers

Suresh Kumar Chettu<sup>a</sup>, Rajesh Bagepalli Madhu<sup>a</sup>, Gajendrasinh Balvantsinh Raolji<sup>a</sup>, Korupolu Raghu Babu<sup>b</sup>, N. S. Kameswara Rao<sup>a</sup>, Srividya Gopalakrishnan<sup>c</sup>, Ayesha Ismail<sup>c</sup>, G. Bhanuprakash Reddy<sup>c</sup> and Syed Shafi<sup>d\*</sup>

<sup>a</sup>GVK Biosciences Private Limited, Medicinal Chemistry Laboratory, Hyderabad 500076, India

<sup>b</sup>Andhra University, Department of Engineering Chemistry, Andhra University College of Engineering (A), Vishakhapatnam 530003, India.

<sup>c</sup>National Institute of Nutrition, Hyderabad-500007, India

<sup>d</sup>Department of Chemistry, Jamia Hamdard, New Delhi-110062

Correspondence to Dr. Syed Shafi, Jamia Hamdard (Hamdard University) Hamdard Nagar, New Delhi 110 062, Email ID. Syedshafi@jamiahamdard.ac.in. Phone: +91 9990806873.

#### Table of contents

|                                                                                 |      |
|---------------------------------------------------------------------------------|------|
| 1. <sup>1</sup> H NMR, <sup>13</sup> C NMR, chiral HPLCs, COSY<br>HMBC and HSQC | 2-98 |
|---------------------------------------------------------------------------------|------|

<sup>1</sup>H NMR of Compound 7 in DMSO-d<sub>6</sub>

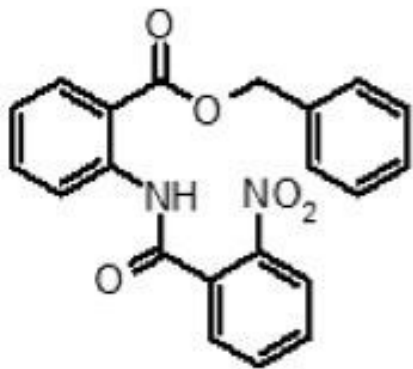

7

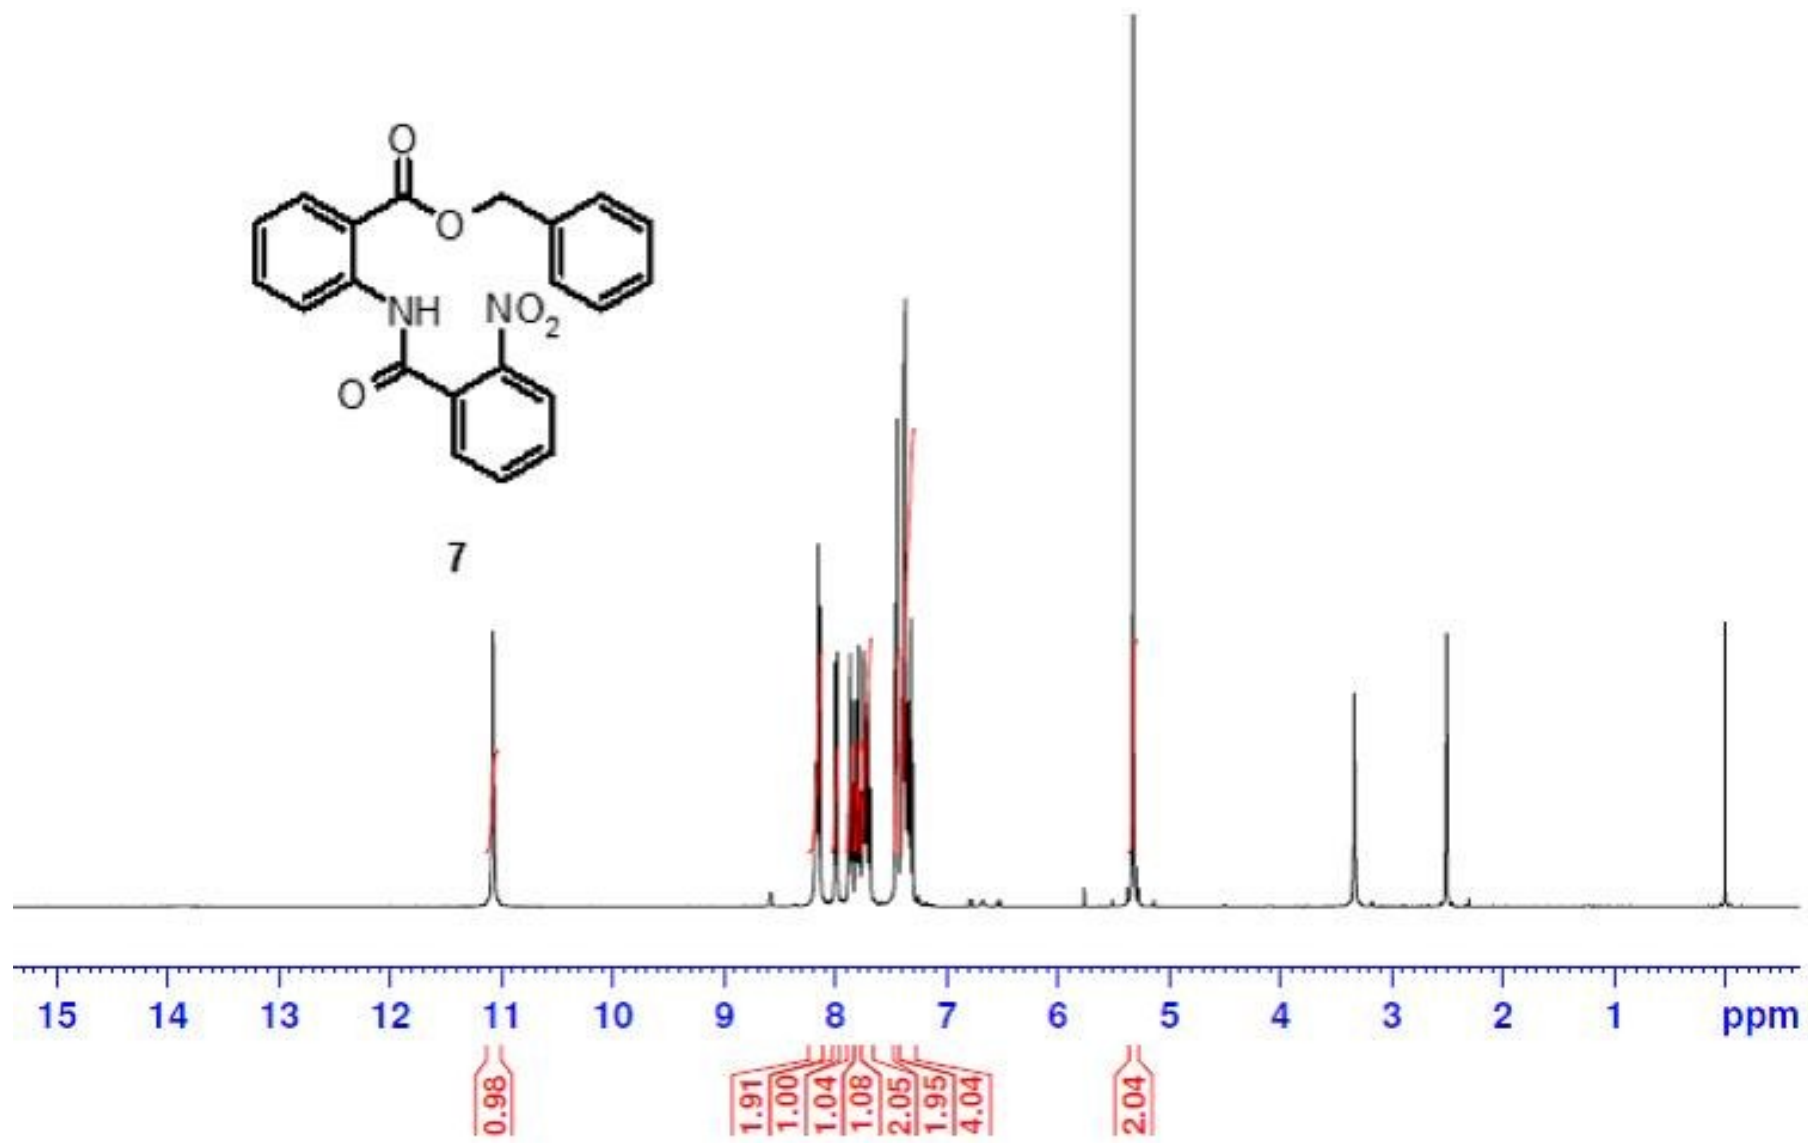

<sup>13</sup>C NMR of Compound 7 in DMSO-d<sub>6</sub>

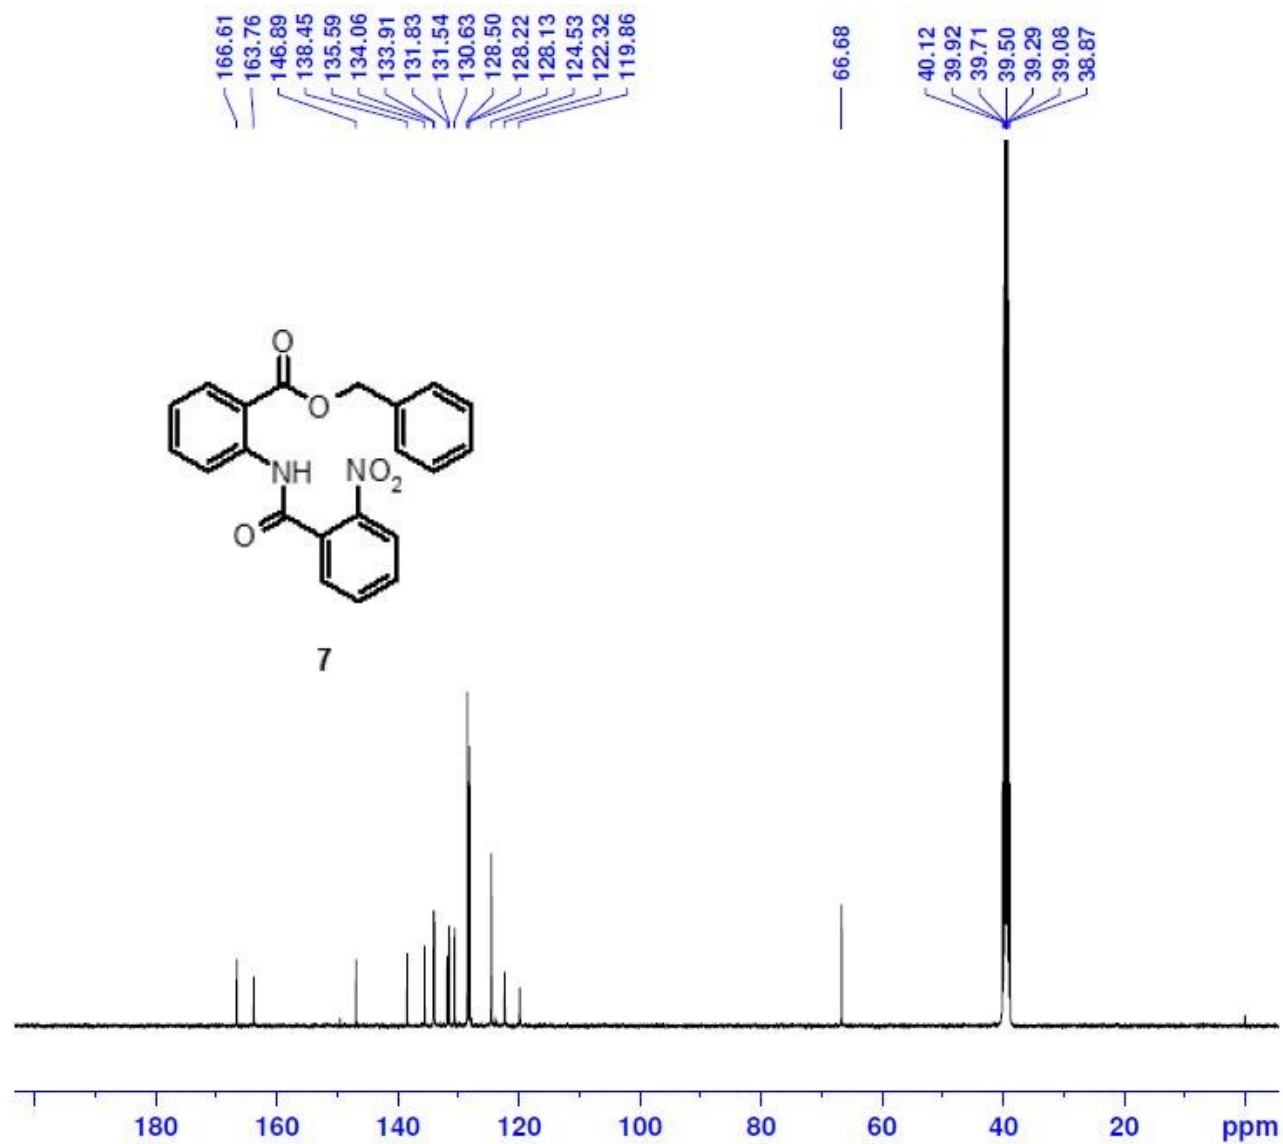

<sup>1</sup>H NMR of Compound 8 in DMSO-d<sub>6</sub>

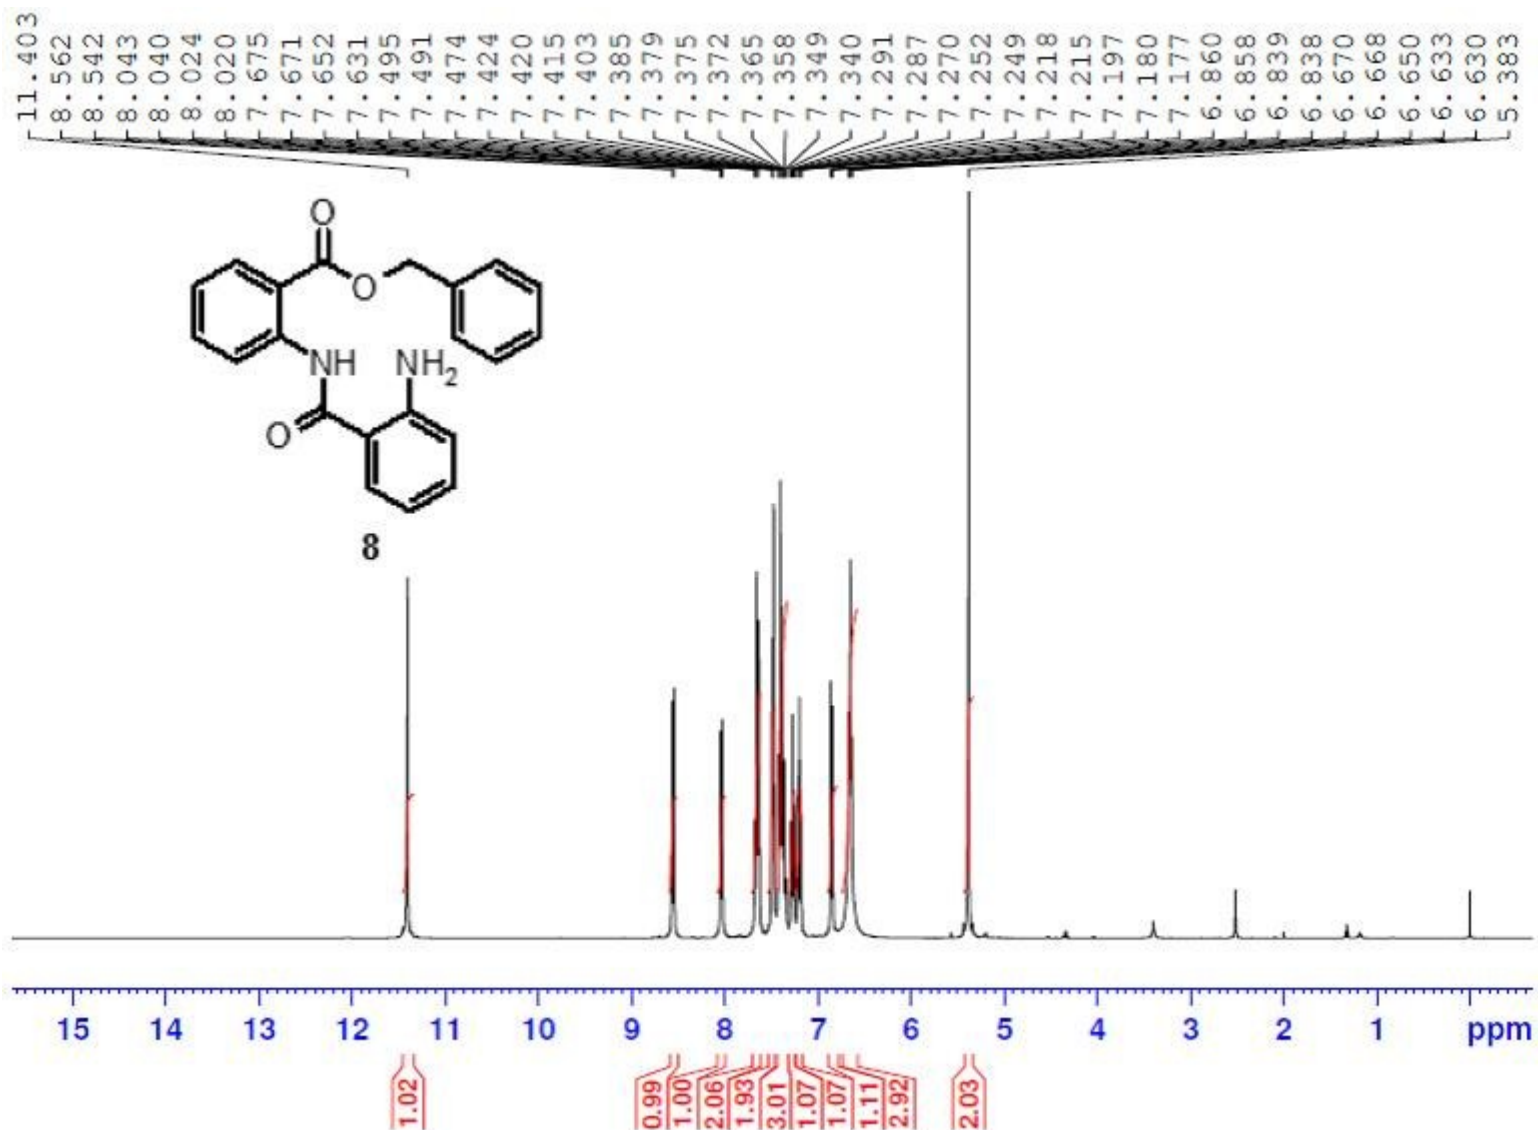

<sup>13</sup>C NMR of Compound 8 in DMSO-d<sub>6</sub>

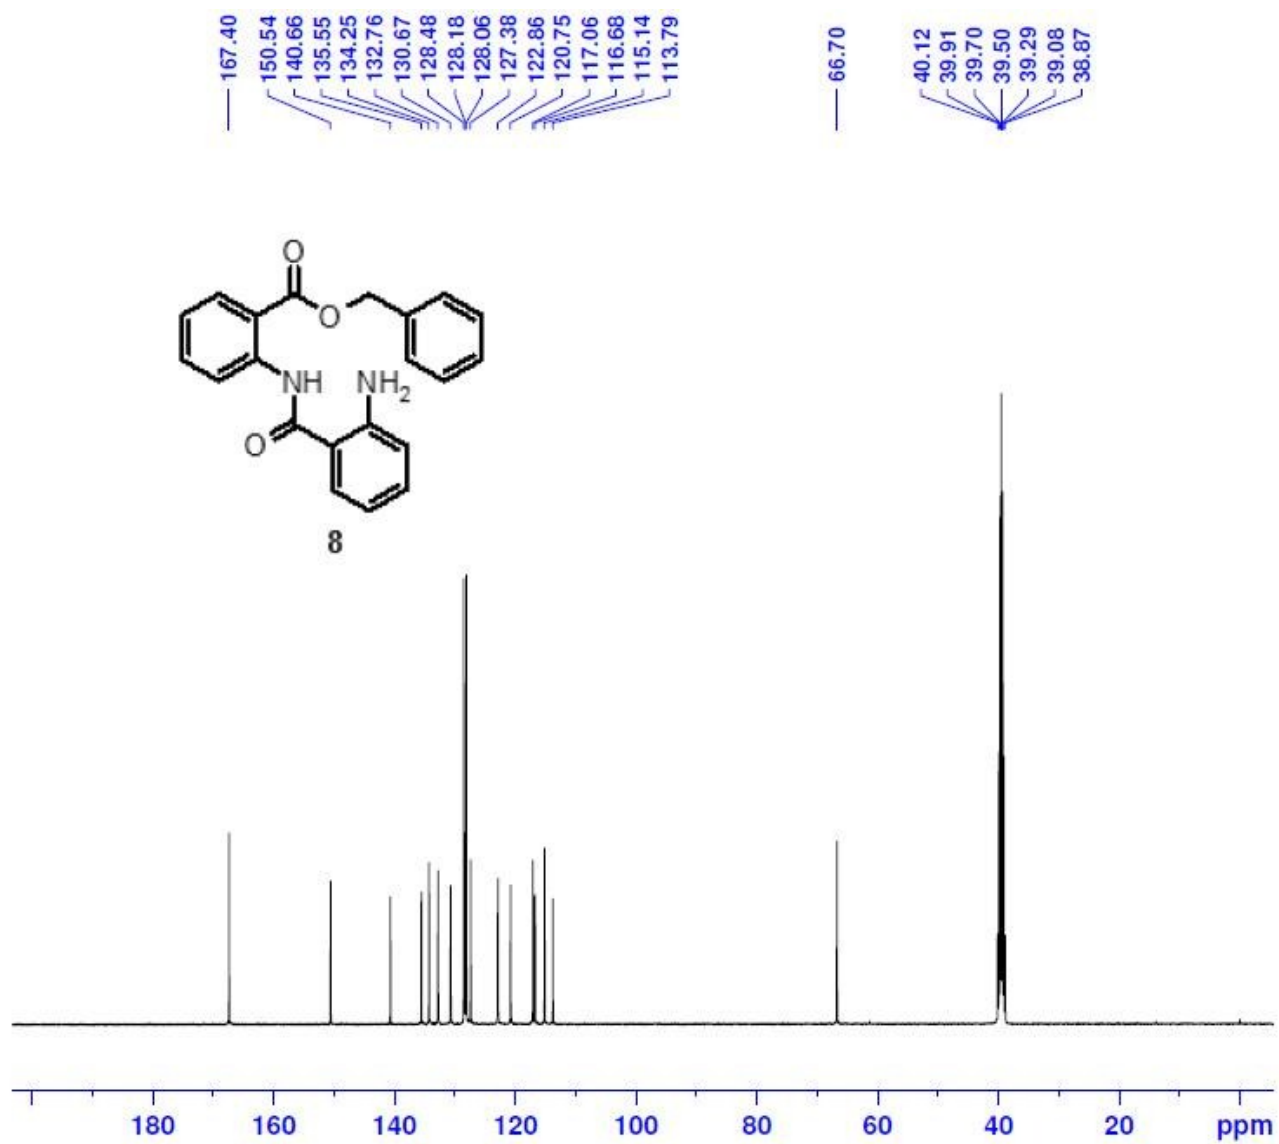

<sup>1</sup>H NMR of Compound 9 in DMSO-d<sub>6</sub>

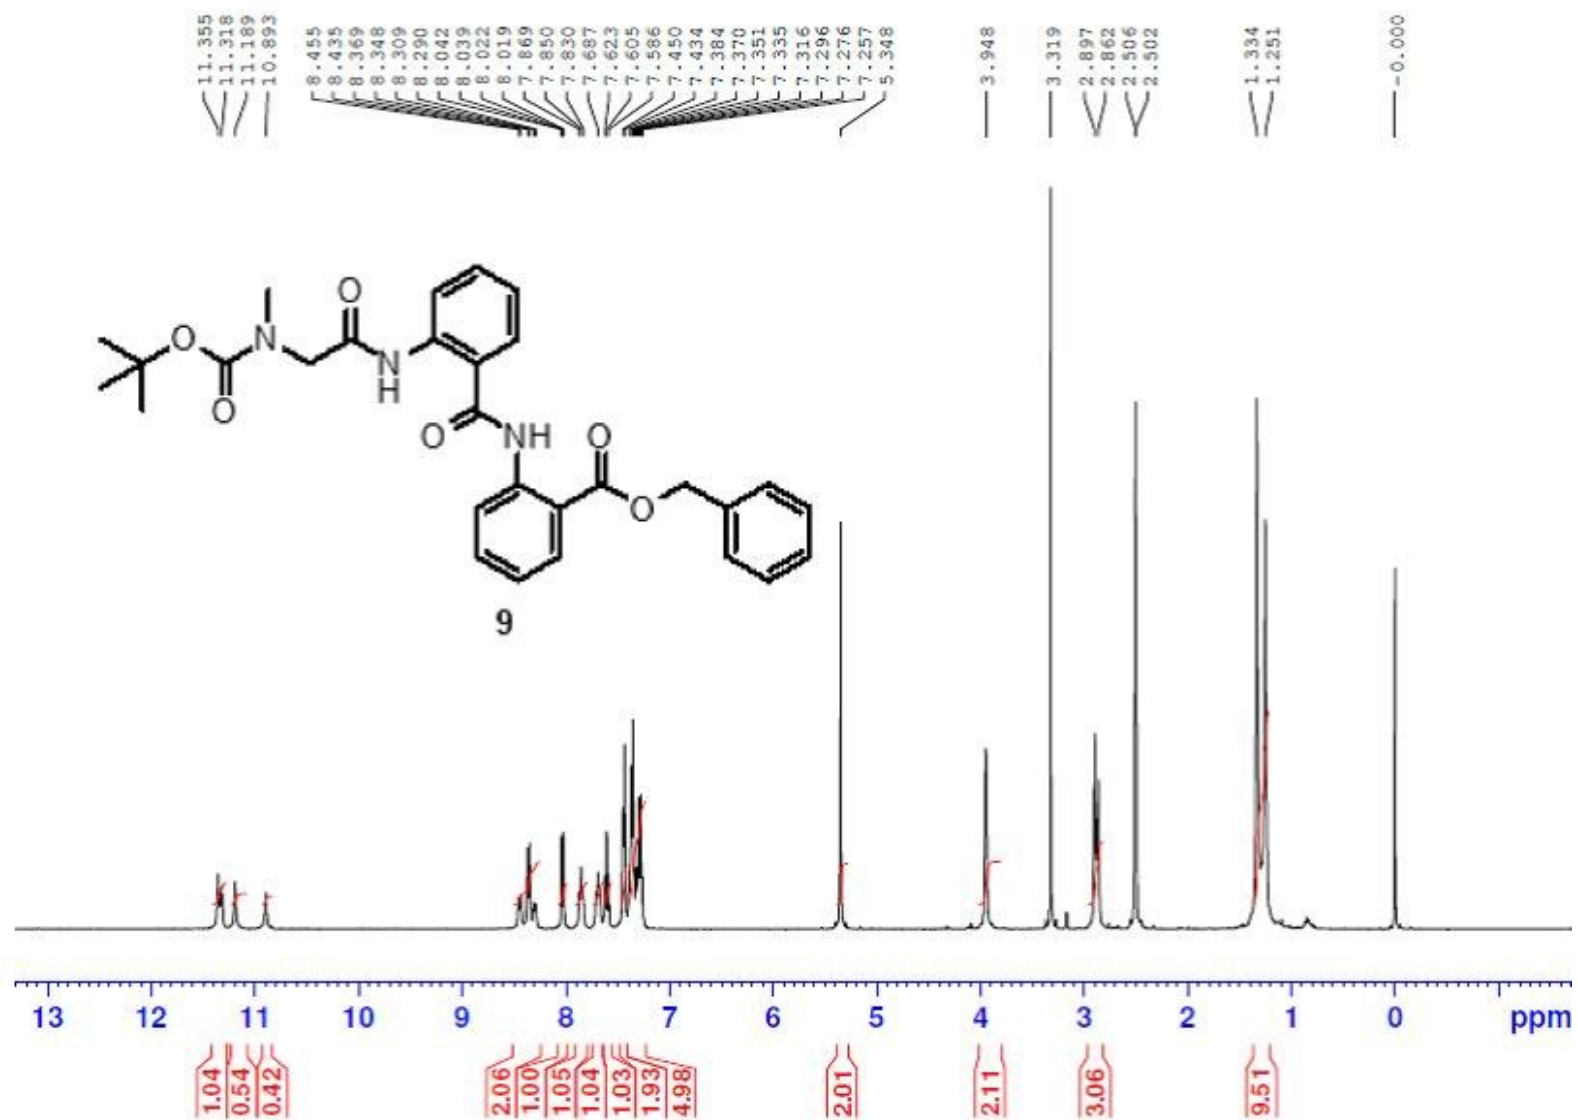

# VT <sup>1</sup>H NMR of Compound 9 in DMSO-d<sub>6</sub>

temp at 90 degrees

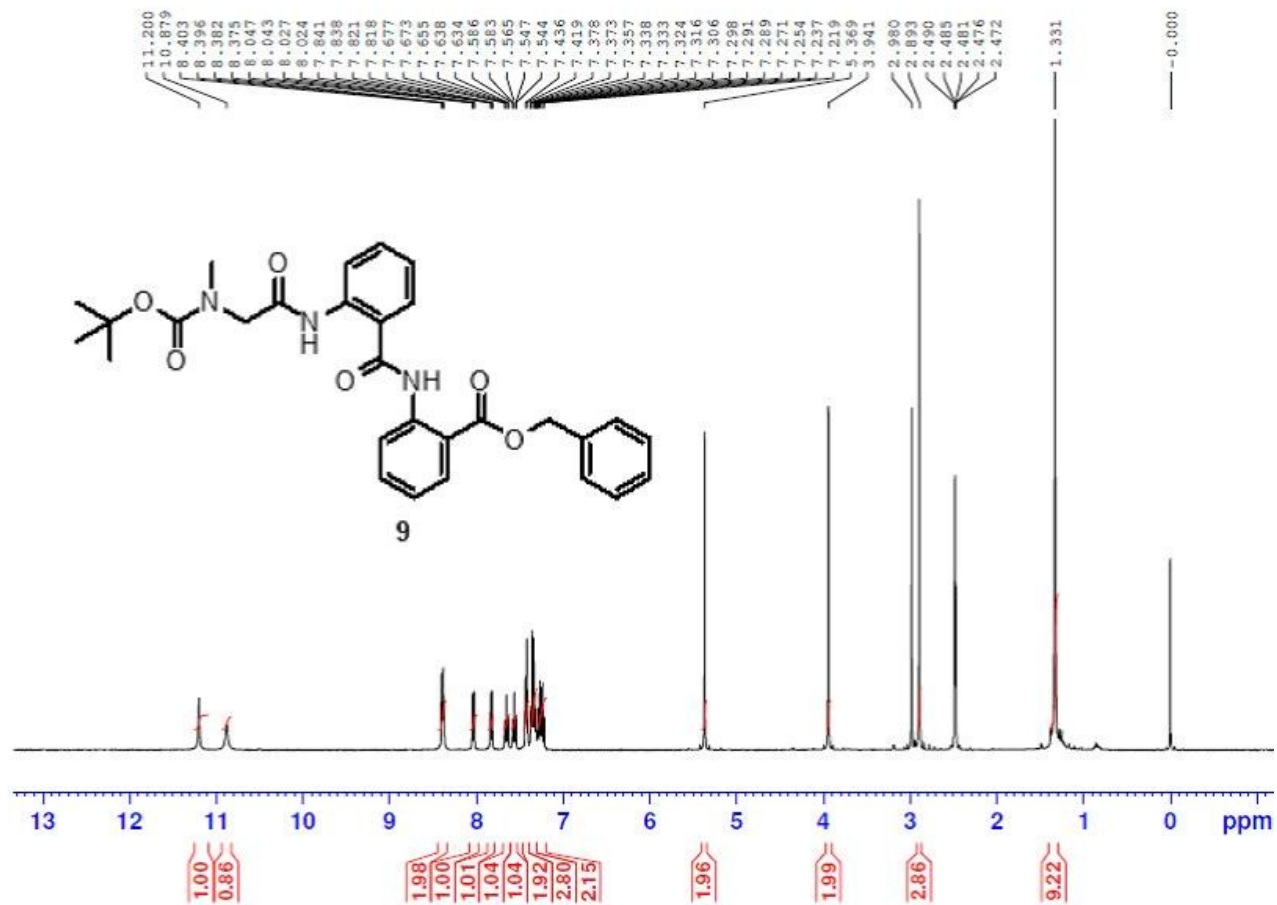

# <sup>1</sup>H NMR of Compound 10 in DMSO-d<sub>6</sub>

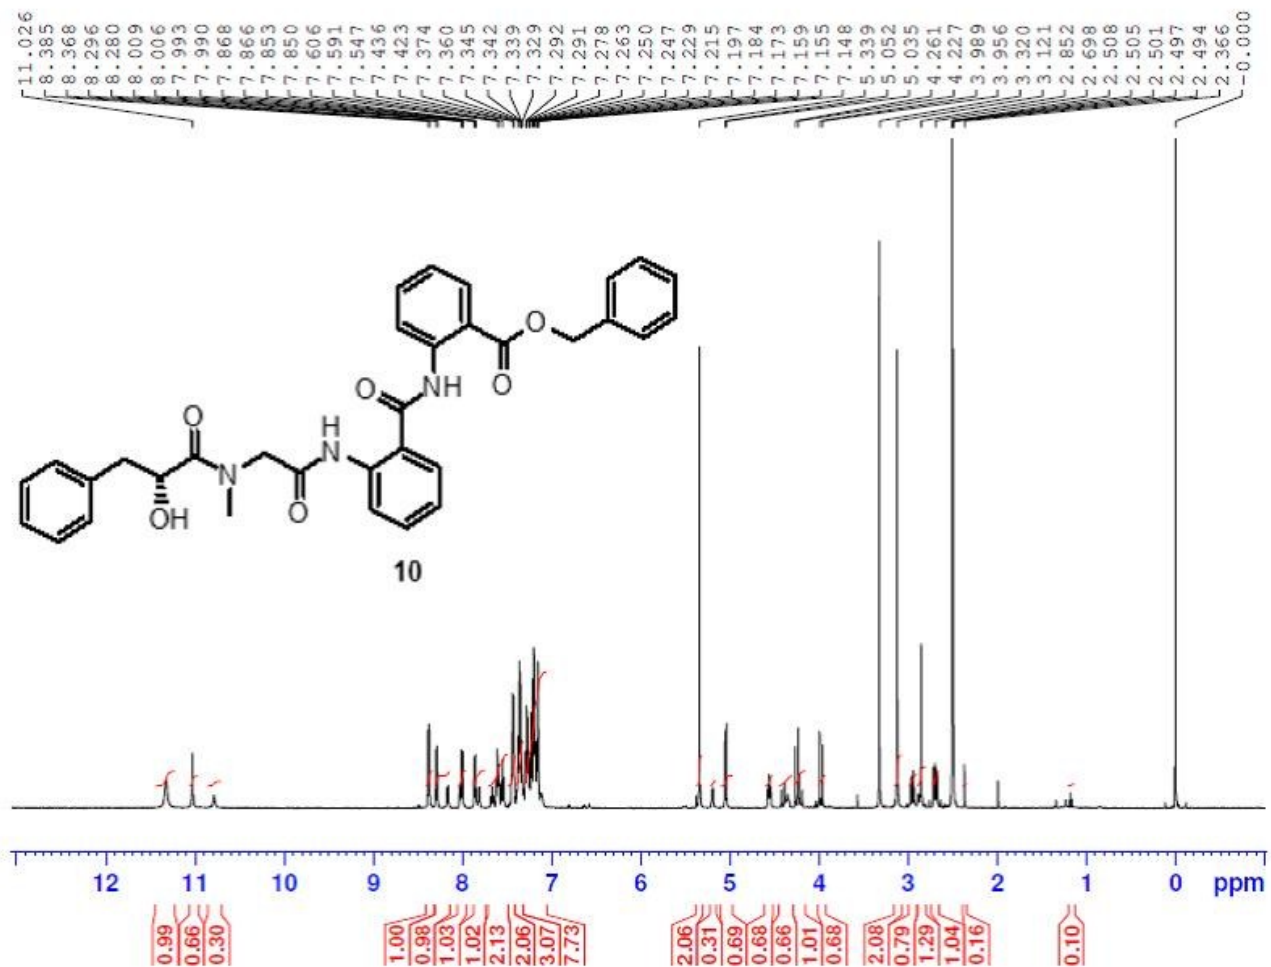



# VT <sup>1</sup>H NMR of Compound 10 in DMSO-d<sub>6</sub>

AT 90°C

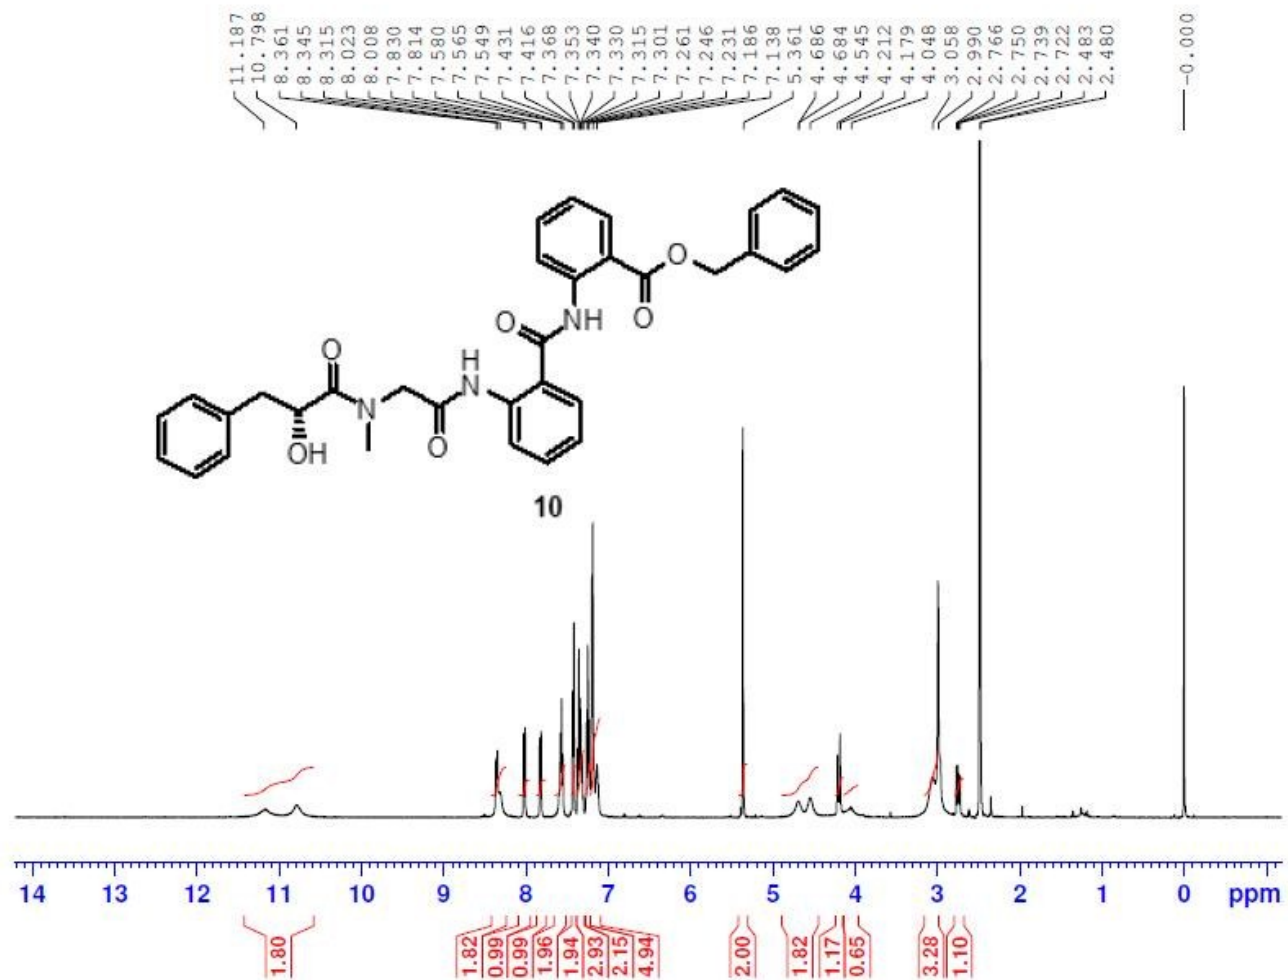

<sup>1</sup>H NMR of Compound 5 in DMSO-d<sub>6</sub>

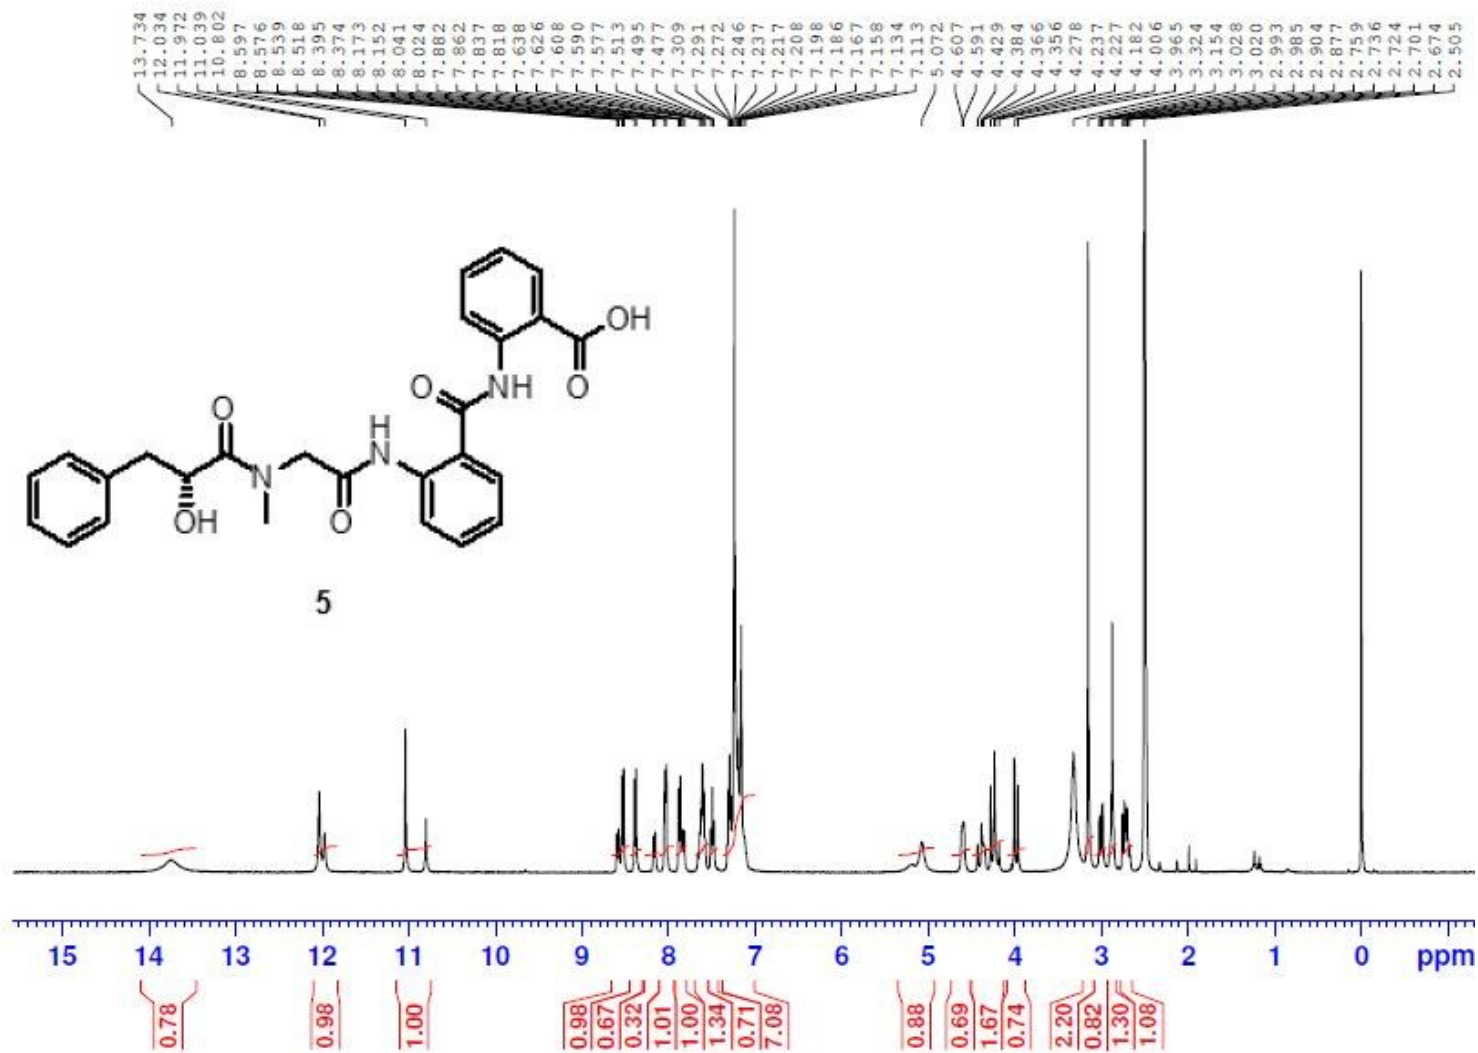

# VT <sup>1</sup>H NMR of Compound 5 in DMSO-d<sub>6</sub>

AT 90°C

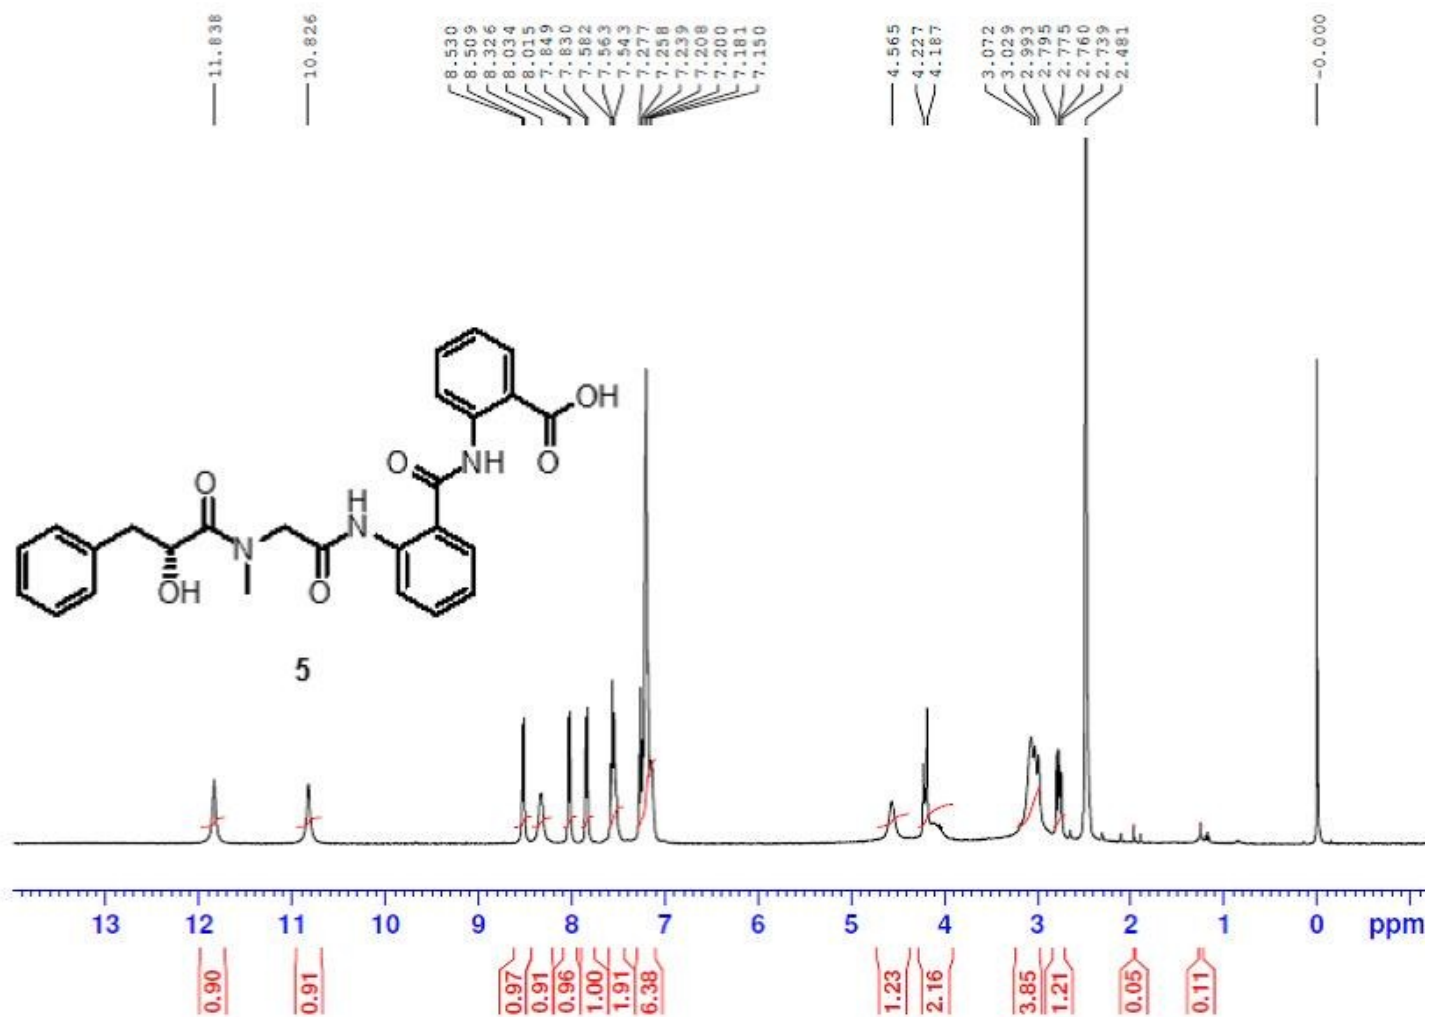

<sup>1</sup>H NMR of Compound 13 in CDCl<sub>3</sub>

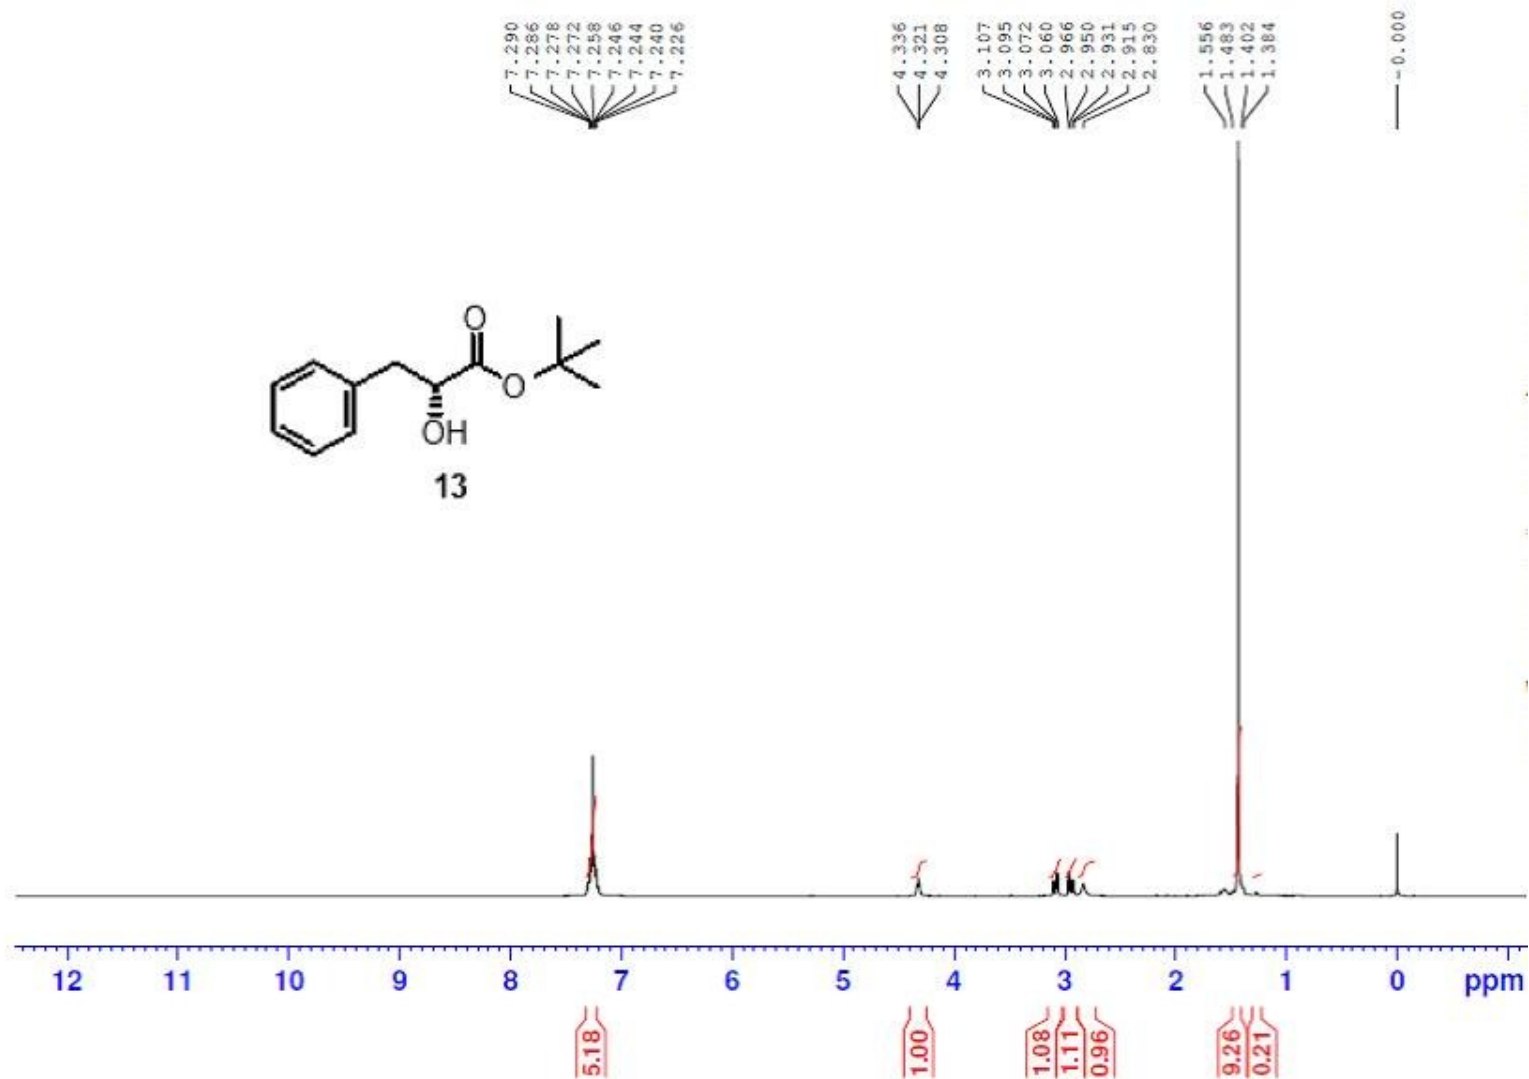

**$^{13}\text{C}$  NMR of Compound 13 in  $\text{CDCl}_3$**

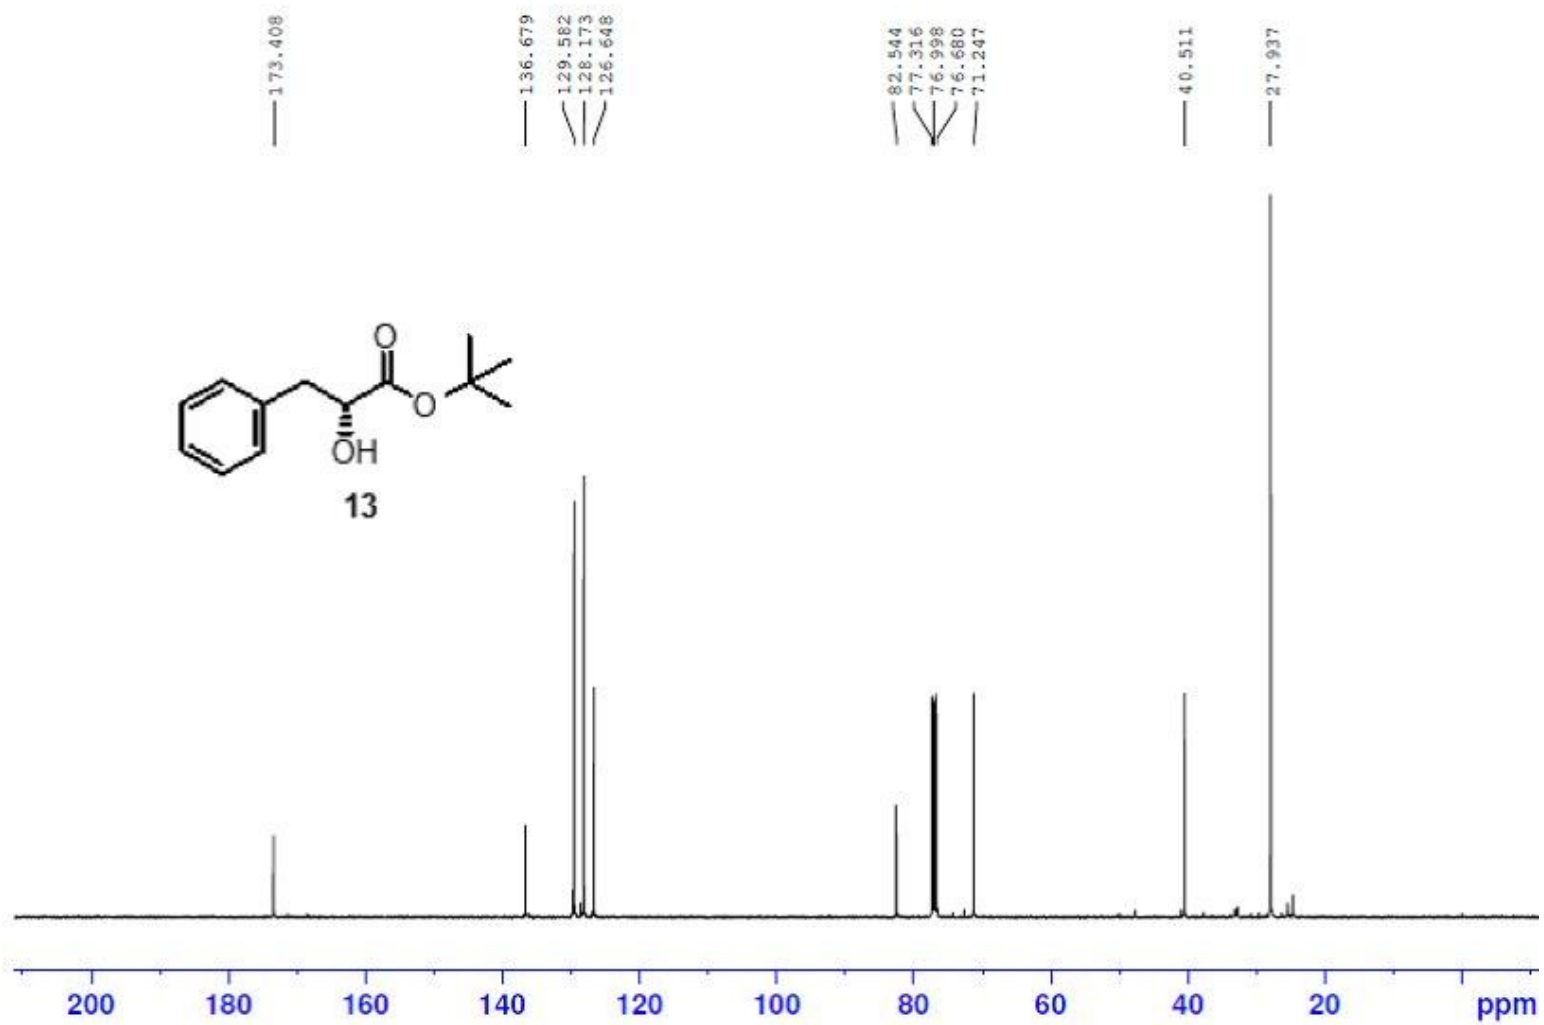

**<sup>1</sup>H NMR of Compound (S)-13 in CDCl<sub>3</sub>**

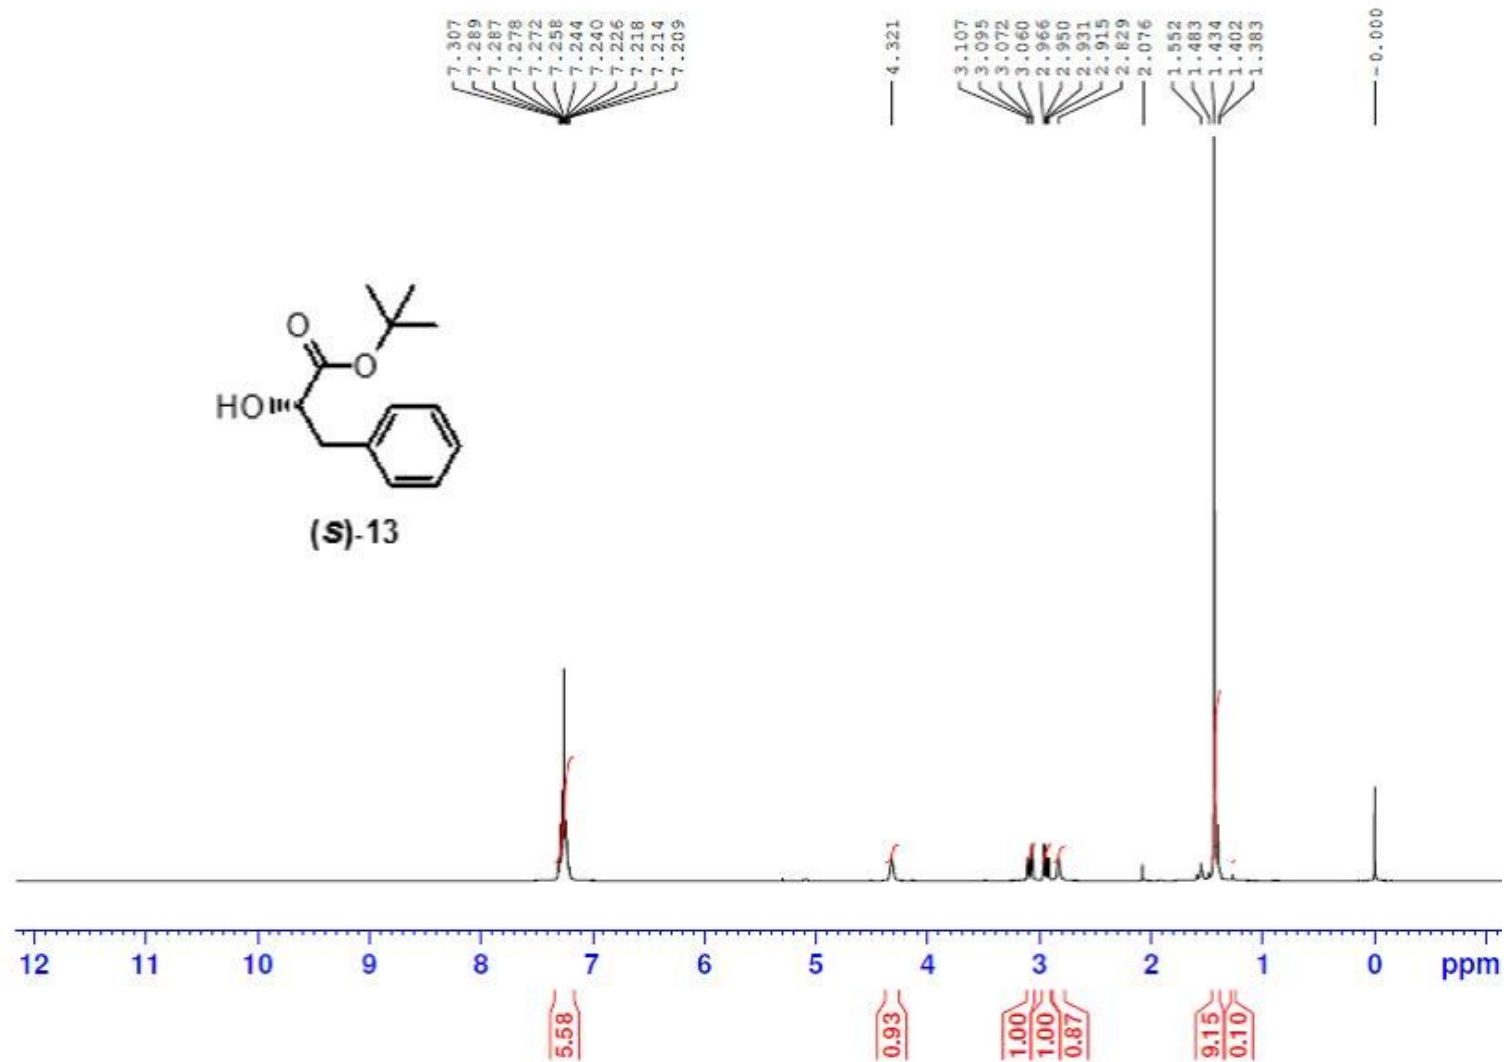

<sup>13</sup>C NMR of Compound (*S*)-13 in CDCl<sub>3</sub>

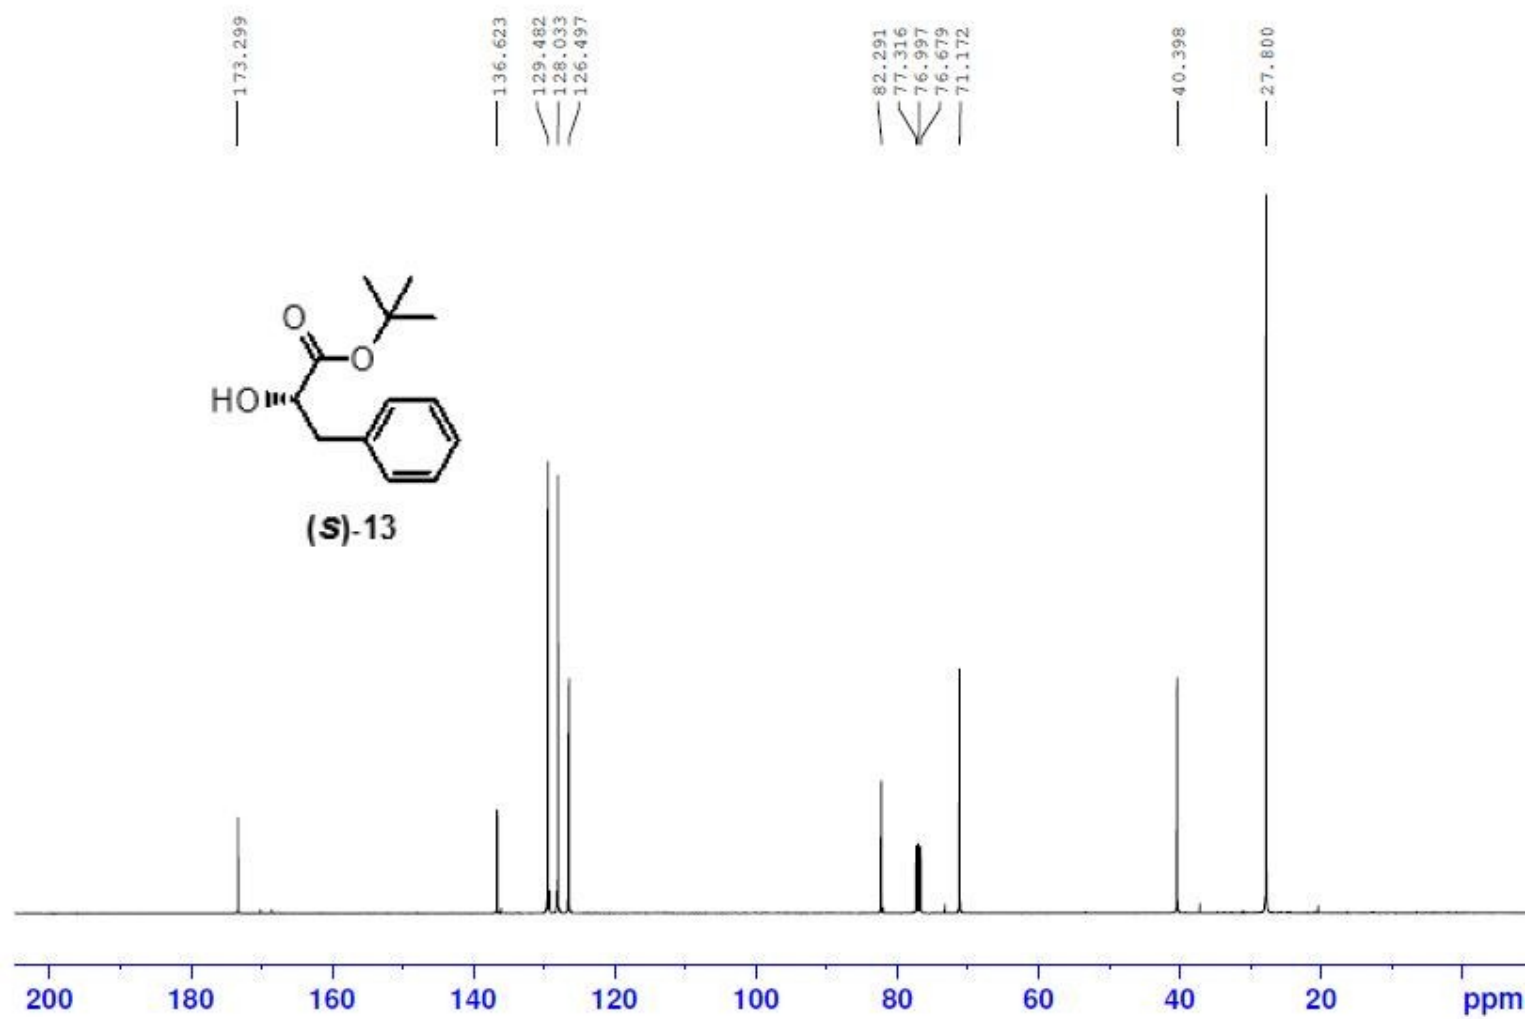

## Racemic of compound 13 and (S)-13

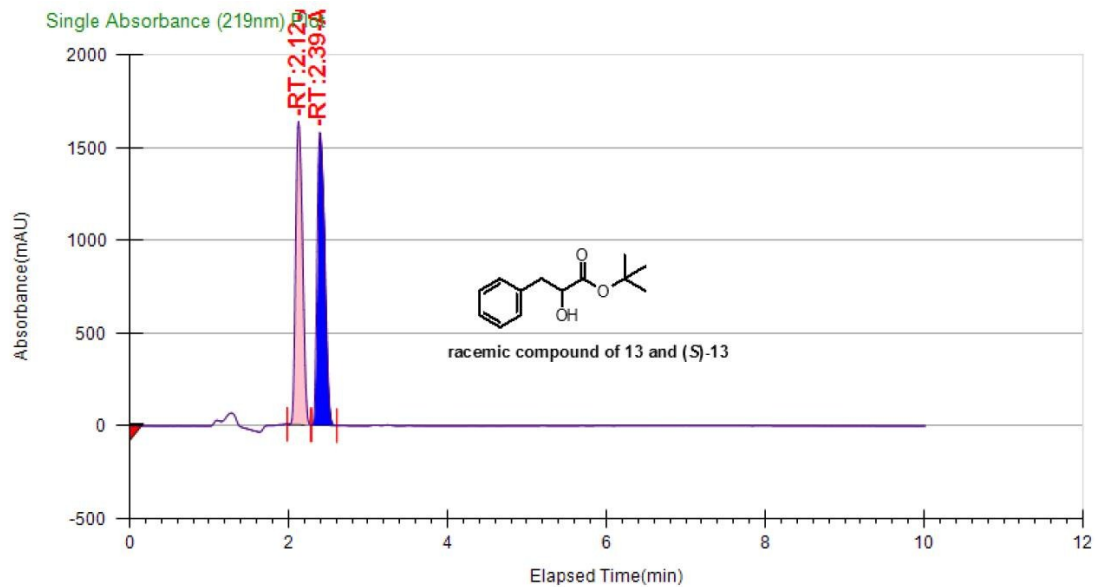

### General Information

| Log Author    | Log Date                | Report By     | Report Date | Notes |
|---------------|-------------------------|---------------|-------------|-------|
| Administrator | 5/9/2015<br>10:17:18 PM | Administrator | 5/11/2015   |       |

### Run Information

| Instrument Method | Inj. Vol. | Solvent                 | Column                               | Sample                        | Well Location | Temp. | Flow | % Modifier | Pressure |
|-------------------|-----------|-------------------------|--------------------------------------|-------------------------------|---------------|-------|------|------------|----------|
| 3g-10%-100bar     | 10        | 0.5% DEA in<br>METHANOL | Chiralpak AD-<br>H(4.6*250)-<br>mm5u | GVKP-SK-<br>B1329-110-<br>Rac | 21B           | 29.9  | 3    | 10         | 100      |

### Peak Information

| Peak No | % Area  | Area       | Ret. Time | Height    | Cap. Factor |
|---------|---------|------------|-----------|-----------|-------------|
| 1       | 48.4422 | 9572.8763  | 2.12 min  | 1632.6803 | 2124        |
| 2       | 51.5578 | 10188.5709 | 2.39 min  | 1575.5709 | 2390.6667   |



## Chiral HPLC of Compound 13

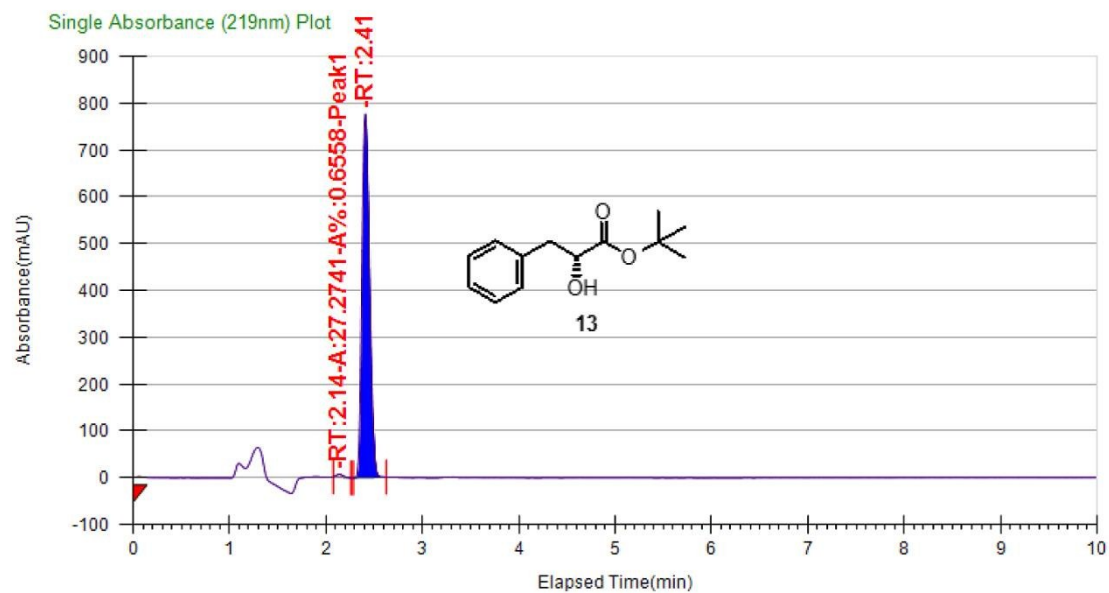

### General Information

| Log Author    | Log Date                | Report By     | Report Date | Notes |
|---------------|-------------------------|---------------|-------------|-------|
| Administrator | 5/9/2015<br>10:40:09 PM | Administrator | 5/11/2015   |       |

### Run Information

| Instrument Method | Inj. Vol. | Solvent                 | Column                              | Sample               | Well Location | Temp. | Flow | % Modifier | Pressure |
|-------------------|-----------|-------------------------|-------------------------------------|----------------------|---------------|-------|------|------------|----------|
| 3g-10%-100bar     | 10        | 0.5% DEA in<br>METHANOL | Chiralpak AD-<br>H(4.6*250)<br>mm5u | GVKP-SK-<br>B1329-87 | 22B           | 30.2  | 3    | 10         | 100      |

### Peak Information

| Peak No | % Area  | Area      | Ret. Time | Height   | Cap. Factor |
|---------|---------|-----------|-----------|----------|-------------|
| 1       | 0.6558  | 27.2741   | 2.14 min  | 6.0413   | 2140.6667   |
| 2       | 99.3442 | 4131.4994 | 2.41 min  | 776.0687 | 2407.3333   |

### Chiral HPLC of Compound (S)-13

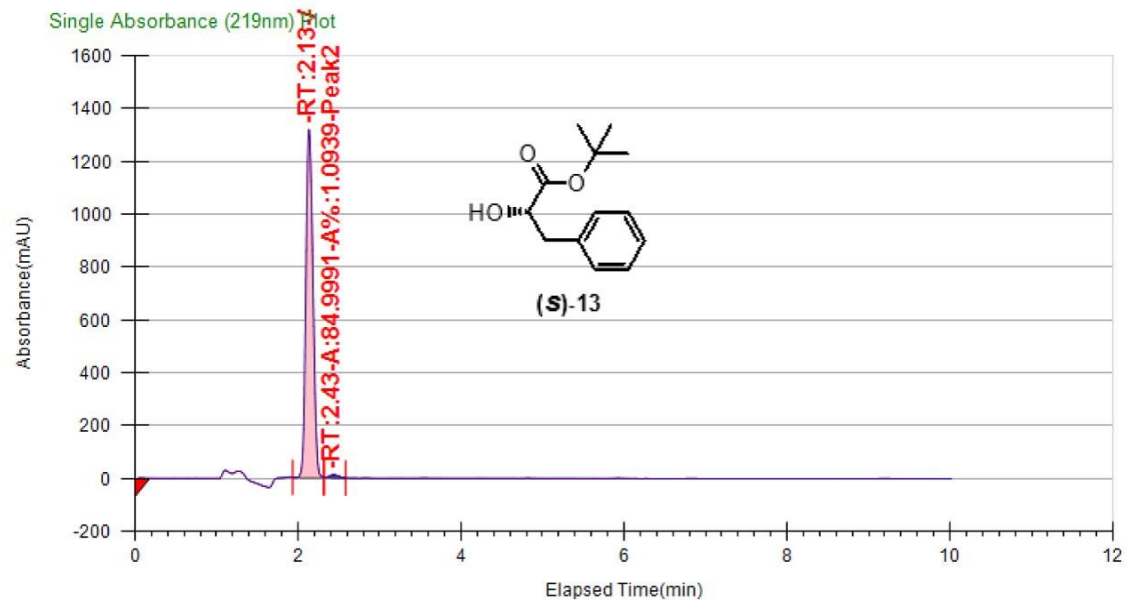

#### General Information

| Log Author    | Log Date                | Report By     | Report Date | Notes |
|---------------|-------------------------|---------------|-------------|-------|
| Administrator | 5/9/2015<br>11:03:01 PM | Administrator | 5/11/2015   |       |

#### Run Information

| Instrument Method | Inj. Vol. | Solvent                 | Column                              | Sample               | Well Location | Temp. | Flow | % Modifier | Pressure |
|-------------------|-----------|-------------------------|-------------------------------------|----------------------|---------------|-------|------|------------|----------|
| 3g-10%-100bar     | 10        | 0.5% DEA in<br>METHANOL | Chiralpak AD-<br>H(4.6*250)<br>mm5u | GVKP-SK-<br>B1329-62 | 23B           | 29.9  | 3    | 10         | 100      |

#### Peak Information

| Peak No | % Area  | Area     | Ret. Time | Height    | Cap. Factor |
|---------|---------|----------|-----------|-----------|-------------|
| 1       | 98.9061 | 7685.035 | 2.13 min  | 1317.2318 | 2132.3333   |
| 2       | 1.0939  | 84.9991  | 2.43 min  | 10.7331   | 2424        |

<sup>1</sup>H NMR of Compound 14 in CDCl<sub>3</sub>

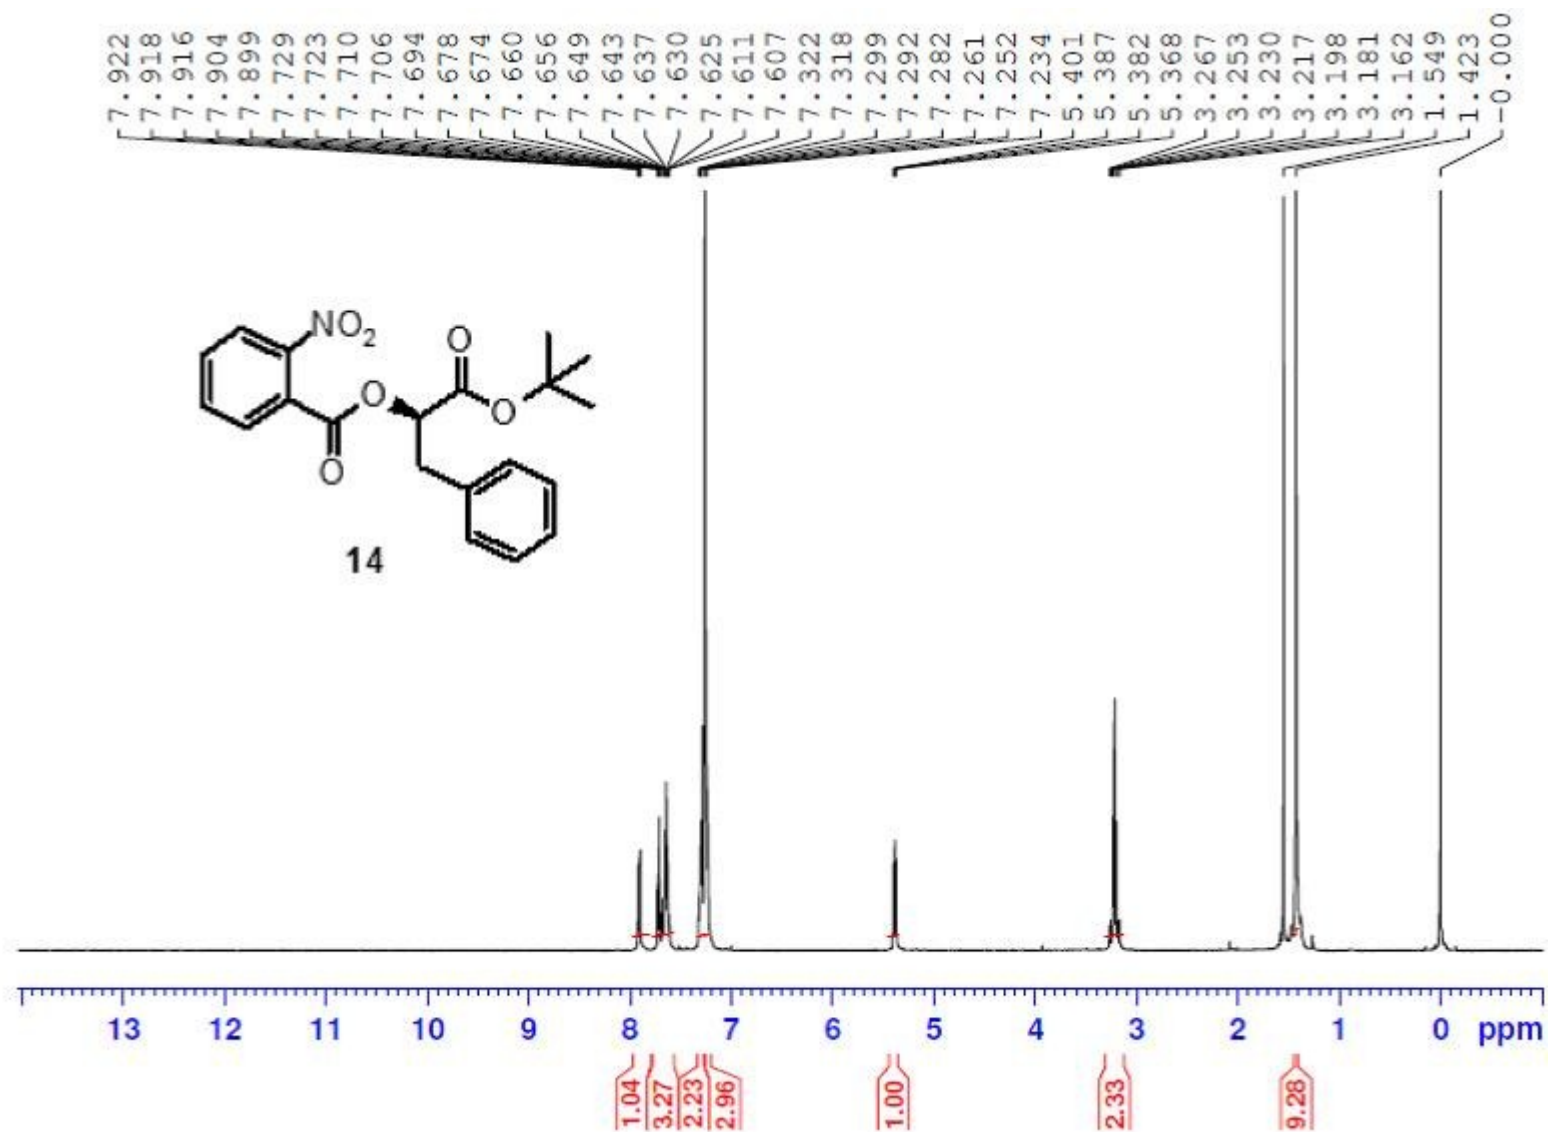

<sup>13</sup>C NMR of Compound 14 in CDCl<sub>3</sub>

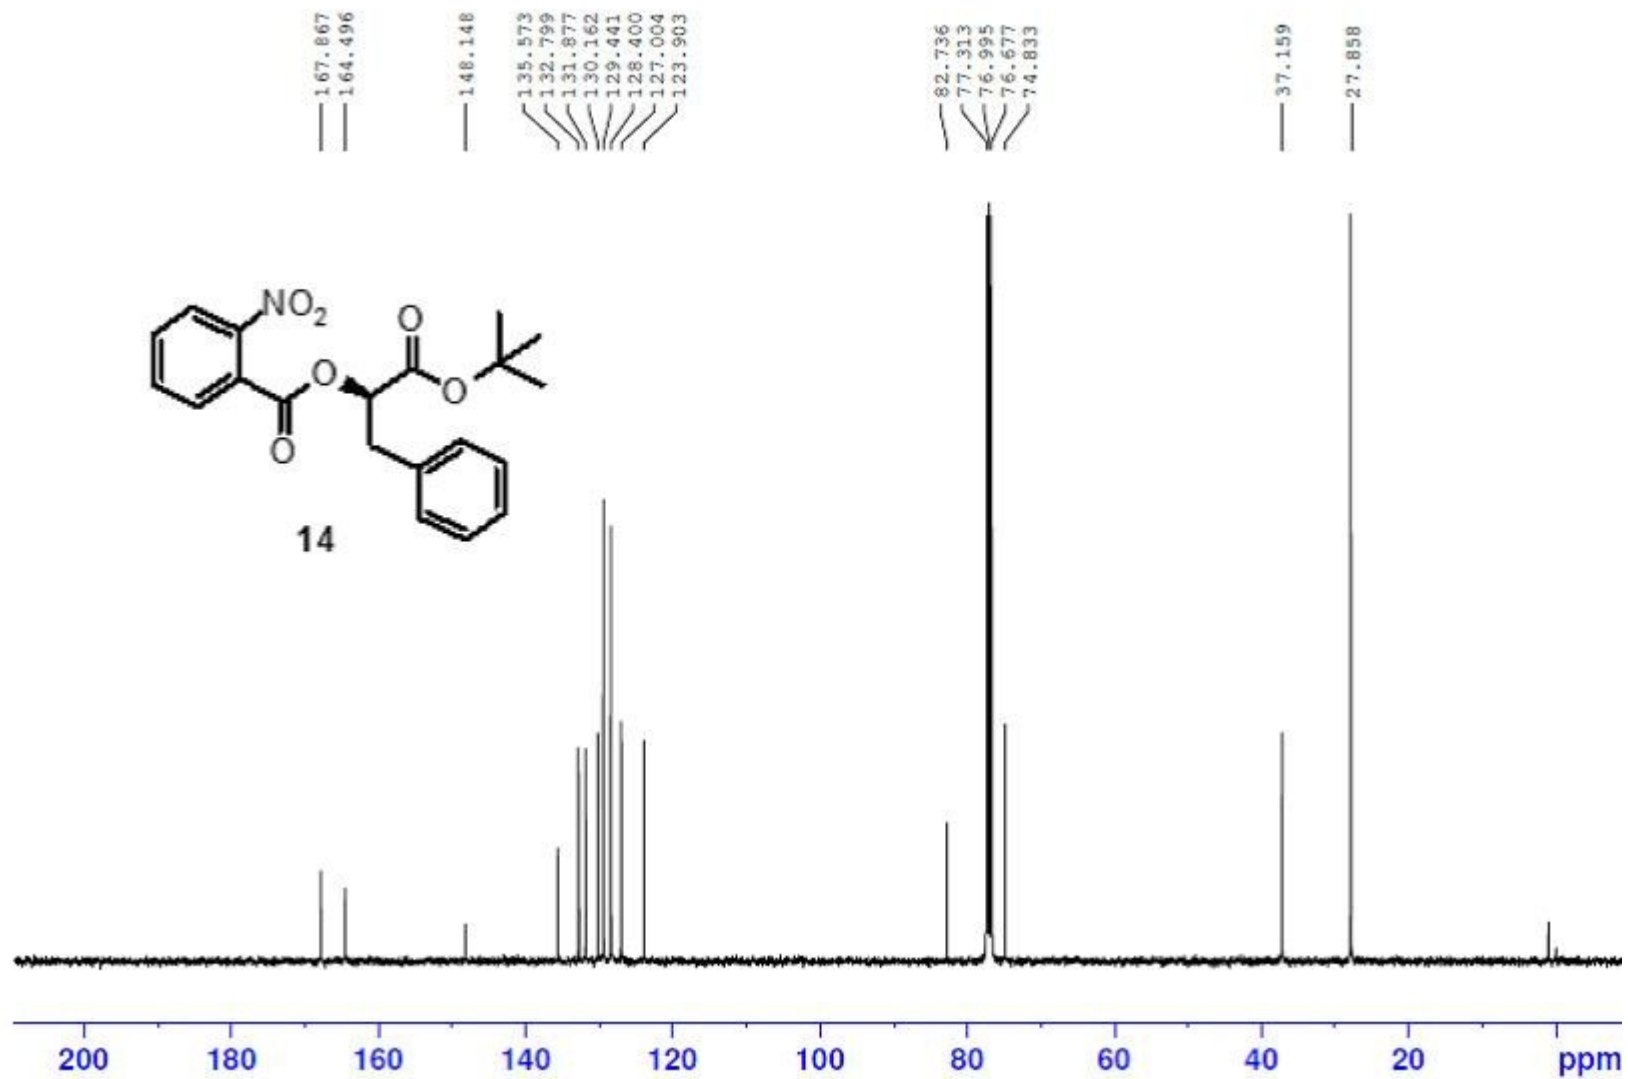

<sup>1</sup>H NMR of Compound *ent-14* in CDCl<sub>3</sub>

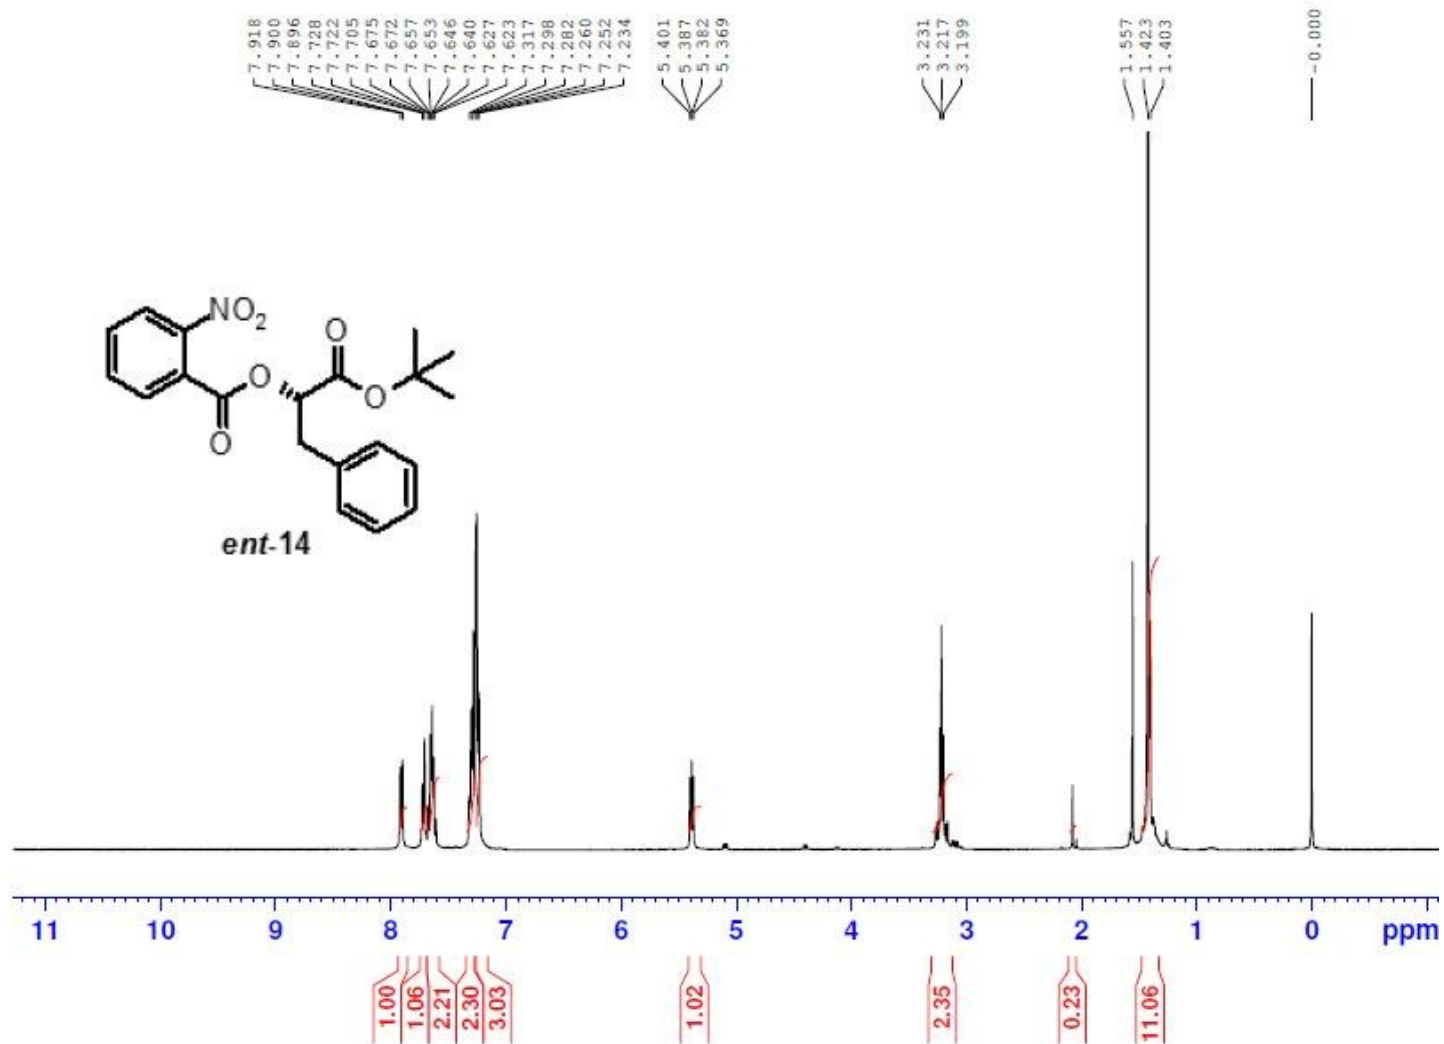

<sup>13</sup>C NMR of Compound-14 in CDCl<sub>3</sub>

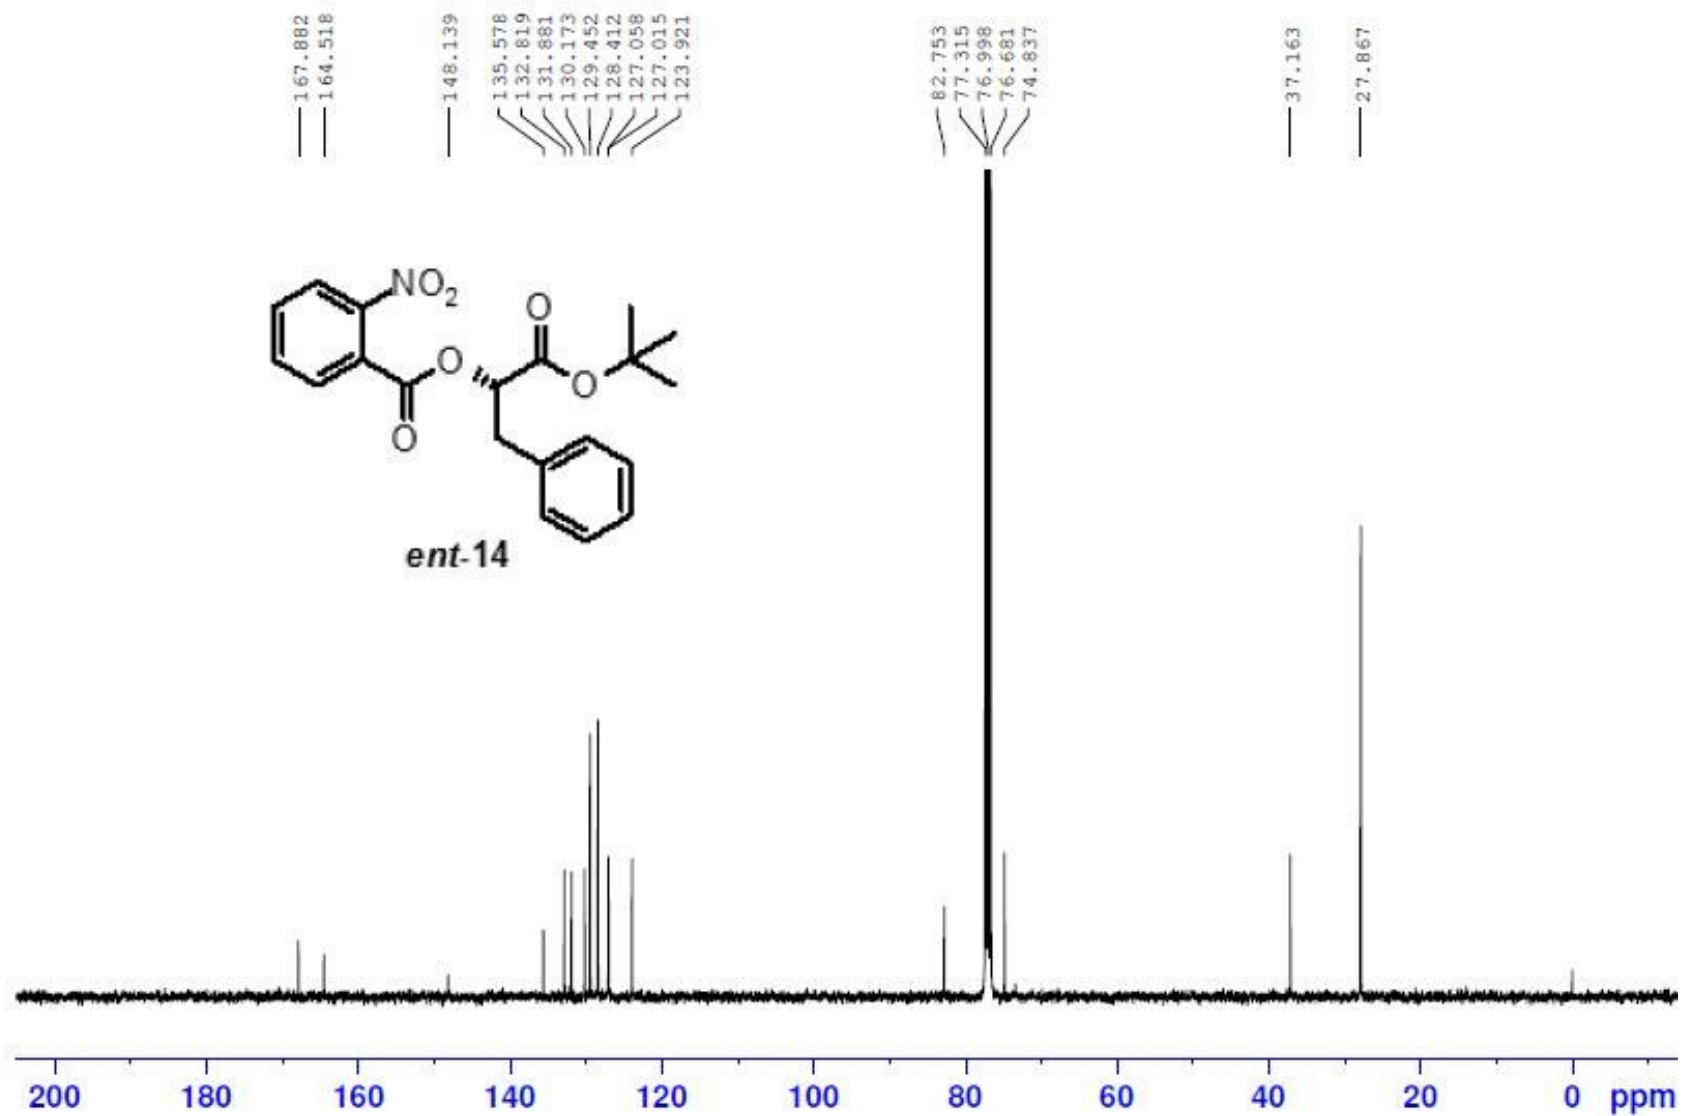

## Racemic of compound 14 and *ent*-14

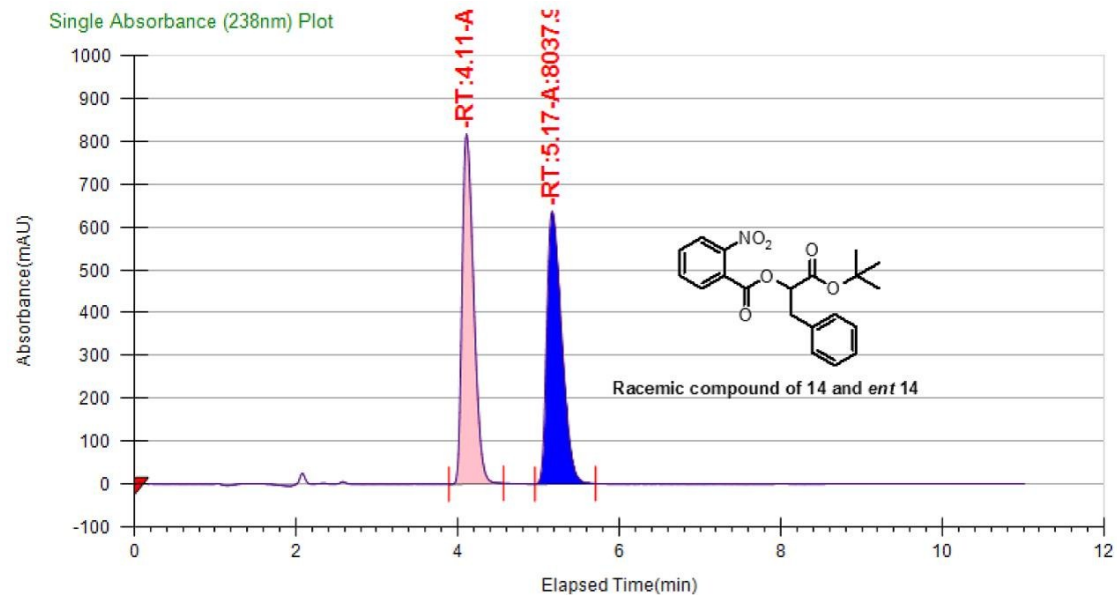

### General Information

| Log Author    | Log Date                | Report By     | Report Date | Notes |
|---------------|-------------------------|---------------|-------------|-------|
| Administrator | 6/11/2015<br>4:40:14 AM | Administrator | 6/11/2015   |       |

### Run Information

| Instrument Method | Inj. Vol. | Solvent                         | Column                             | Sample                        | Well Location | Temp. | Flow  | % Modifier | Pressure |
|-------------------|-----------|---------------------------------|------------------------------------|-------------------------------|---------------|-------|-------|------------|----------|
| 3g-15%-100bar     | 10        | 0.5% Iso propyl<br>amine in IPA | Lux amylose-2<br>(4,6*250)<br>mm5u | GVKP-SK-<br>B1329-111-<br>Rac | 11B           | 30.1  | 2.999 | 14.9717    | 100      |

### Peak Information

| Peak No | % Area  | Area      | Ret. Time | Height   | Cap. Factor |
|---------|---------|-----------|-----------|----------|-------------|
| 1       | 49.9013 | 8006.3336 | 4.11 min  | 816.5615 | 0           |
| 2       | 50.0987 | 8037.9928 | 5.17 min  | 635.4853 | 0           |

## Chiral HPLC of Compound 14

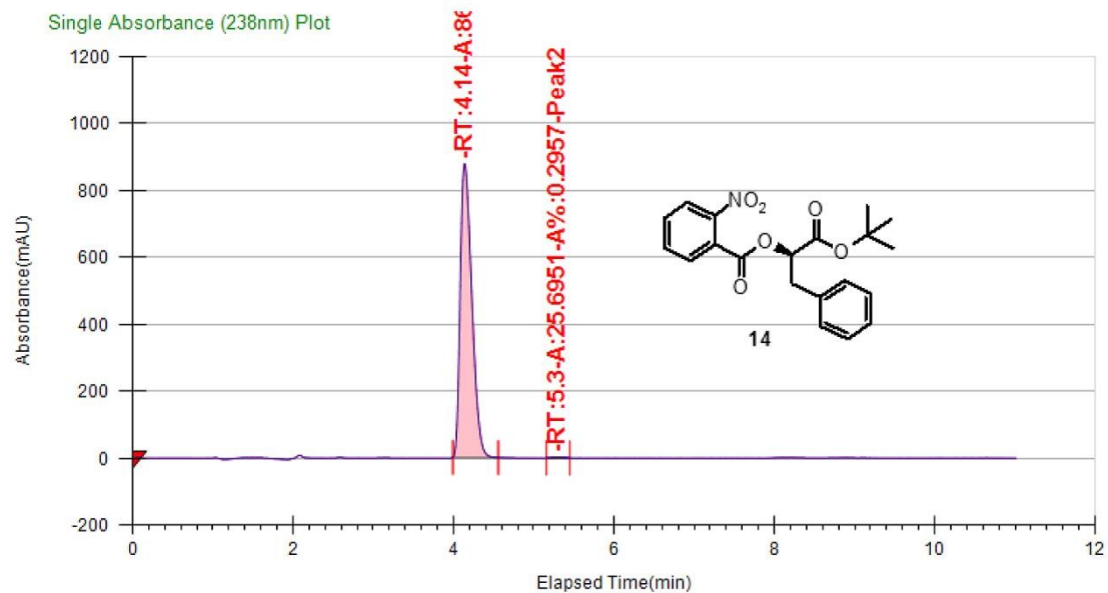

### General Information

| Log Author    | Log Date                | Report By     | Report Date | Notes |
|---------------|-------------------------|---------------|-------------|-------|
| Administrator | 6/11/2015<br>4:03:20 AM | Administrator | 6/11/2015   |       |

### Run Information

| Instrument Method | Inj. Vol. | Solvent                         | Column                             | Sample                 | Well Location | Temp. | Flow  | % Modifier | Pressure |
|-------------------|-----------|---------------------------------|------------------------------------|------------------------|---------------|-------|-------|------------|----------|
| 3g-15%-100bar     | 10        | 0.5% Iso propyl<br>amine in IPA | Lux amylose-2<br>(4,6*250)<br>mm5u | GVKP-SK-<br>B1329-80-R | 12B           | 30    | 2.999 | 14.9717    | 100      |

### Peak Information

| Peak No | % Area  | Area      | Ret. Time | Height   | Cap. Factor |
|---------|---------|-----------|-----------|----------|-------------|
| 1       | 99.7043 | 8663.6863 | 4.14 min  | 877.7471 | 0           |
| 2       | 0.2957  | 25.6951   | 5.3 min   | 2.7786   | 0           |



## Chiral HPLC of Compound *ent*-14

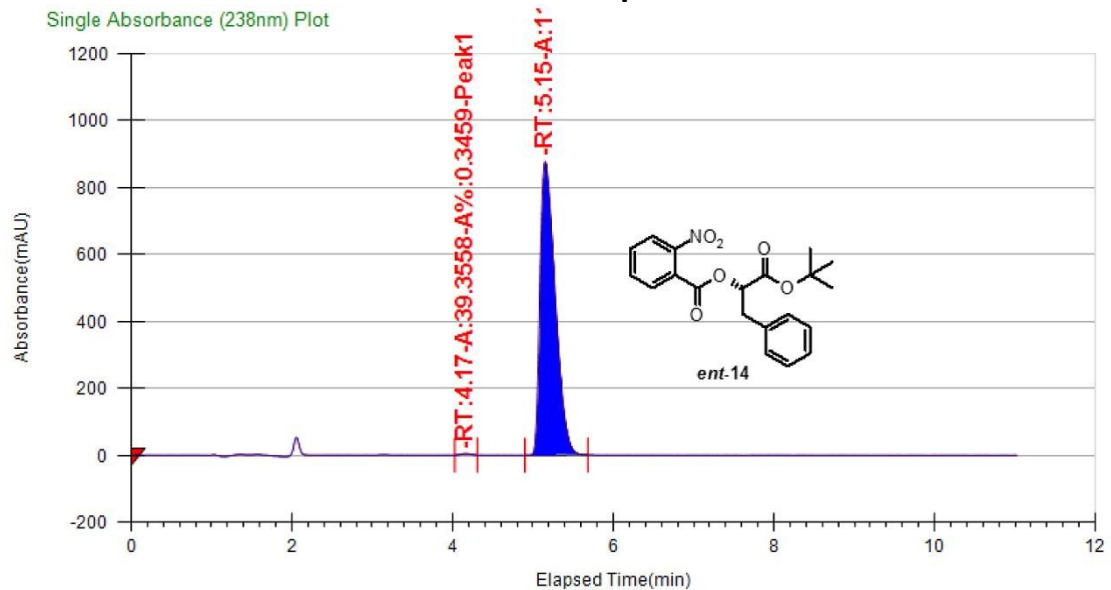

### General Information

| Log Author    | Log Date                | Report By     | Report Date | Notes |
|---------------|-------------------------|---------------|-------------|-------|
| Administrator | 6/11/2015<br>4:27:57 AM | Administrator | 6/11/2015   |       |

### Run Information

| Instrument Method | Inj. Vol. | Solvent                      | Column                       | Sample             | Well Location | Temp. | Flow  | % Modifier | Pressure |
|-------------------|-----------|------------------------------|------------------------------|--------------------|---------------|-------|-------|------------|----------|
| 3g-15%-100bar     | 10        | 0.5% Iso propyl amine in IPA | Lux amylose-2 (4.6*250) mm5u | GVKP-SK-B1329-63-S | 13B           | 30    | 2.999 | 14.9717    | 100      |

### Peak Information

| Peak No | % Area  | Area       | Ret. Time | Height   | Cap. Factor |
|---------|---------|------------|-----------|----------|-------------|
| 1       | 0.3459  | 39.3558    | 4.17 min  | 4.5538   | 4165.6167   |
| 2       | 99.6541 | 11339.7098 | 5.15 min  | 877.4906 | 5148.9333   |

**<sup>1</sup>H NMR of Compound 15 in CDCl<sub>3</sub>**

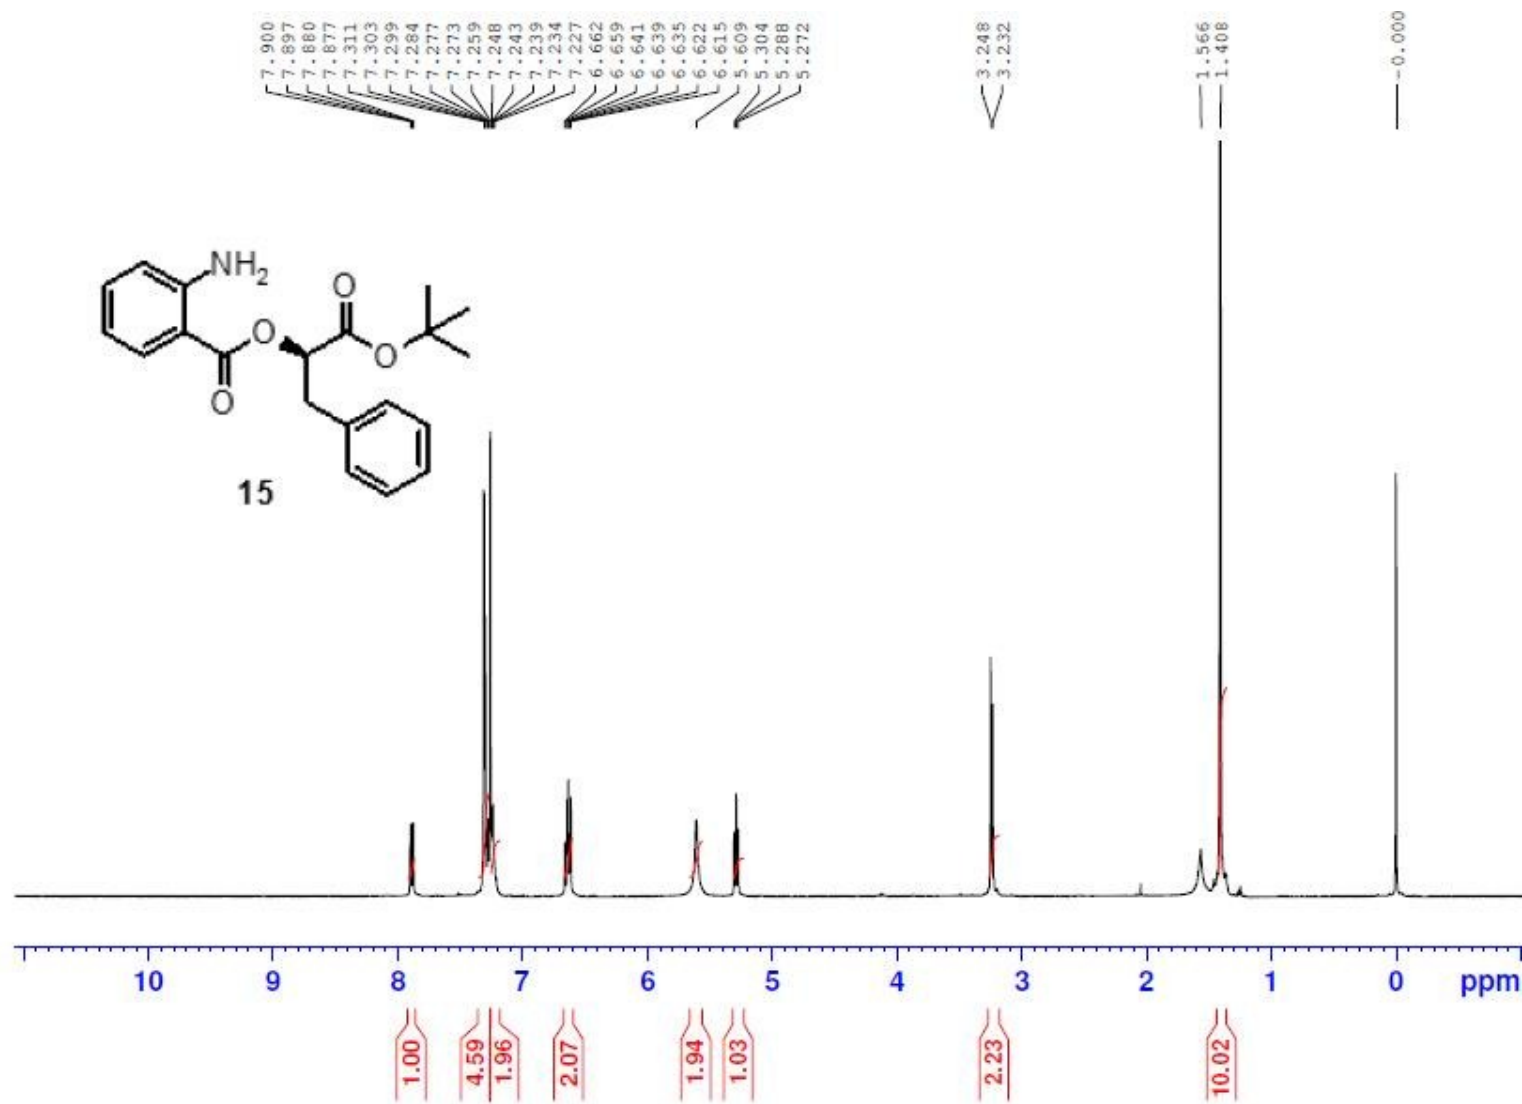

<sup>13</sup>C NMR of Compound 15 in CDCl<sub>3</sub>

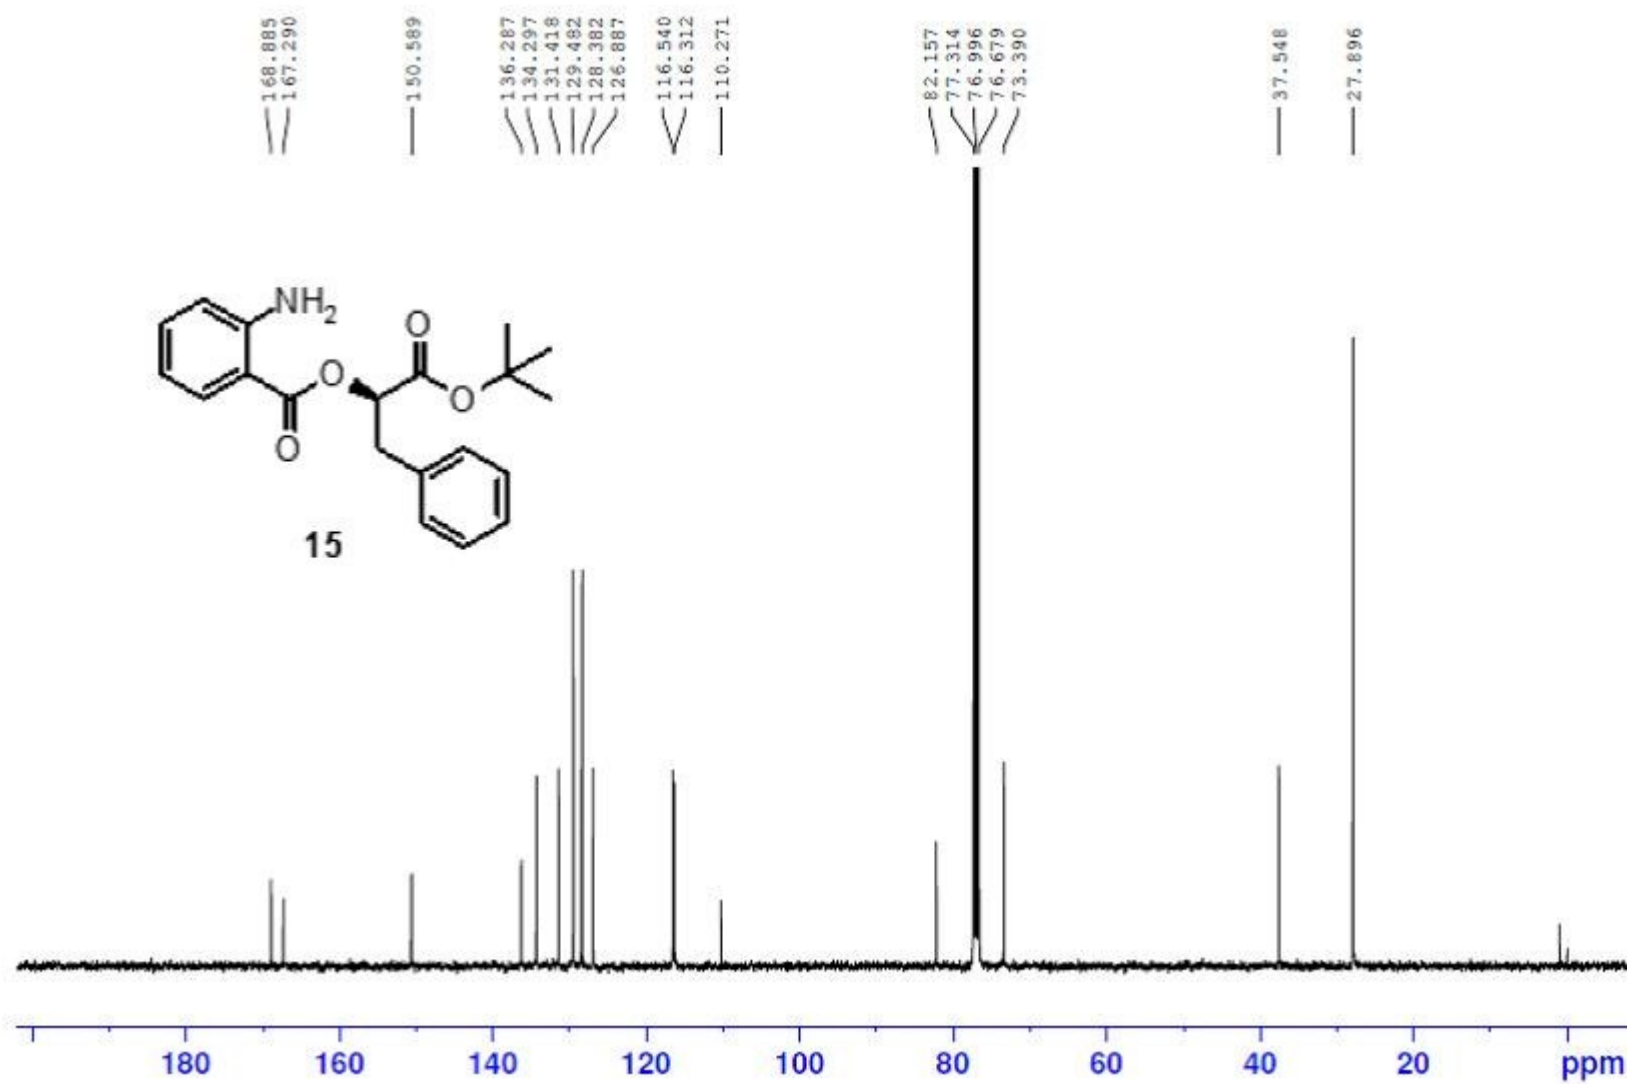

**<sup>1</sup>H NMR of Compound *ent*-15 in CDCl<sub>3</sub>**

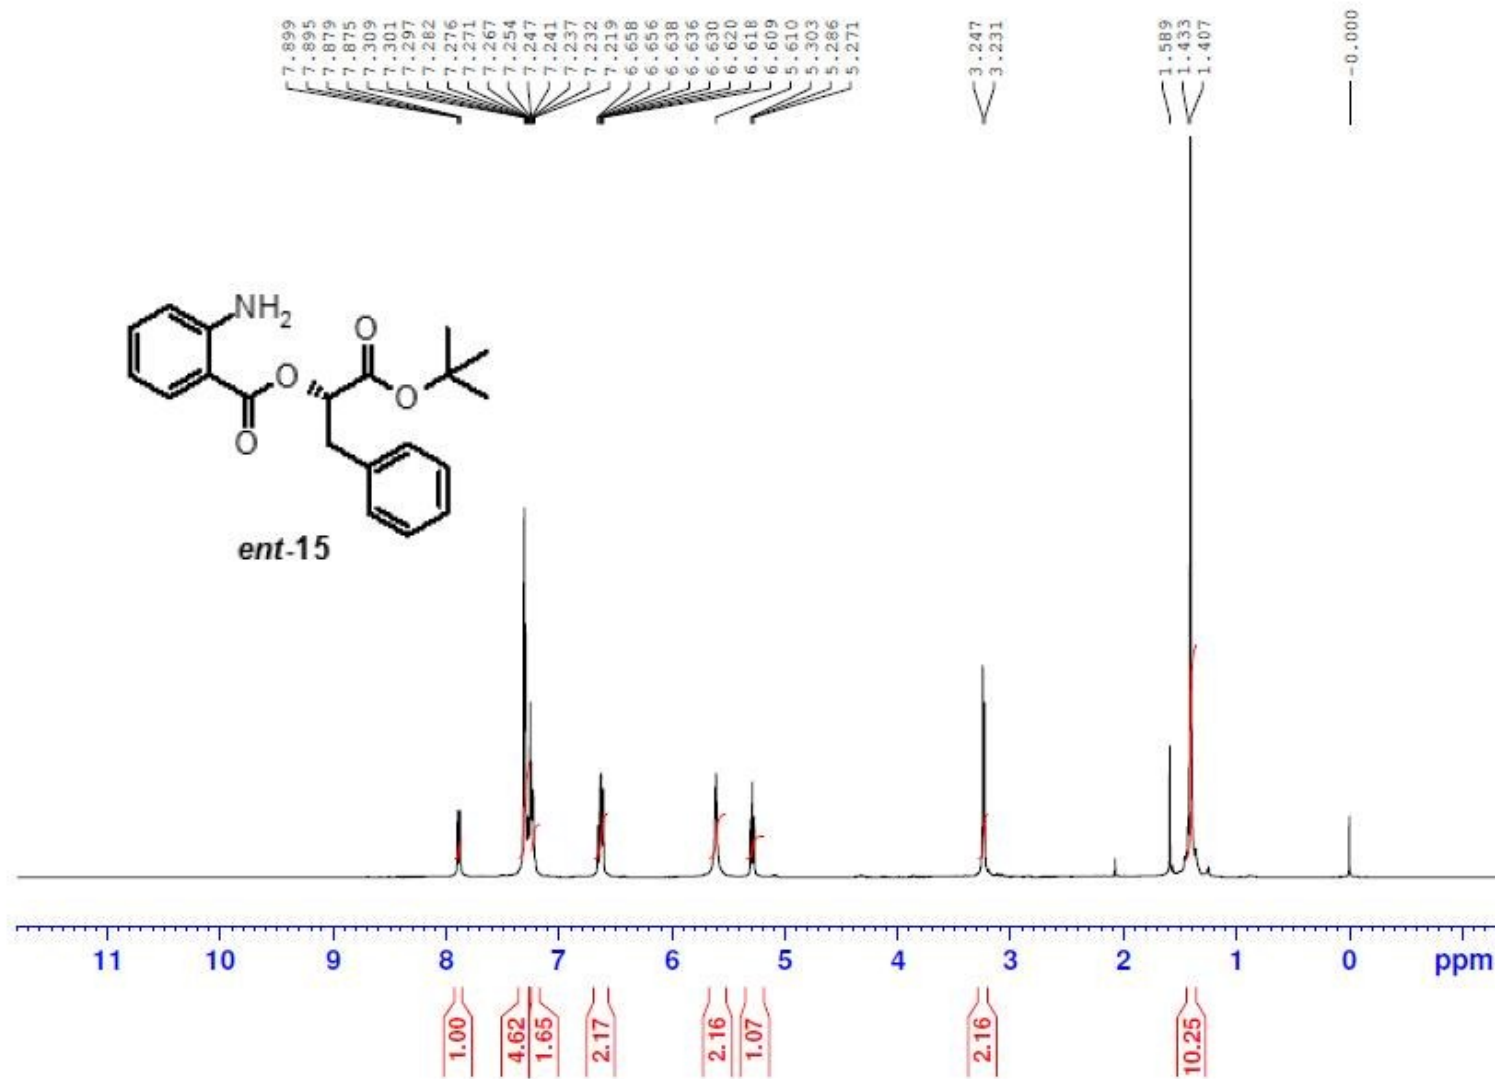

**$^{13}\text{C}$  NMR of Compound *ent*-15 in  $\text{CDCl}_3$**

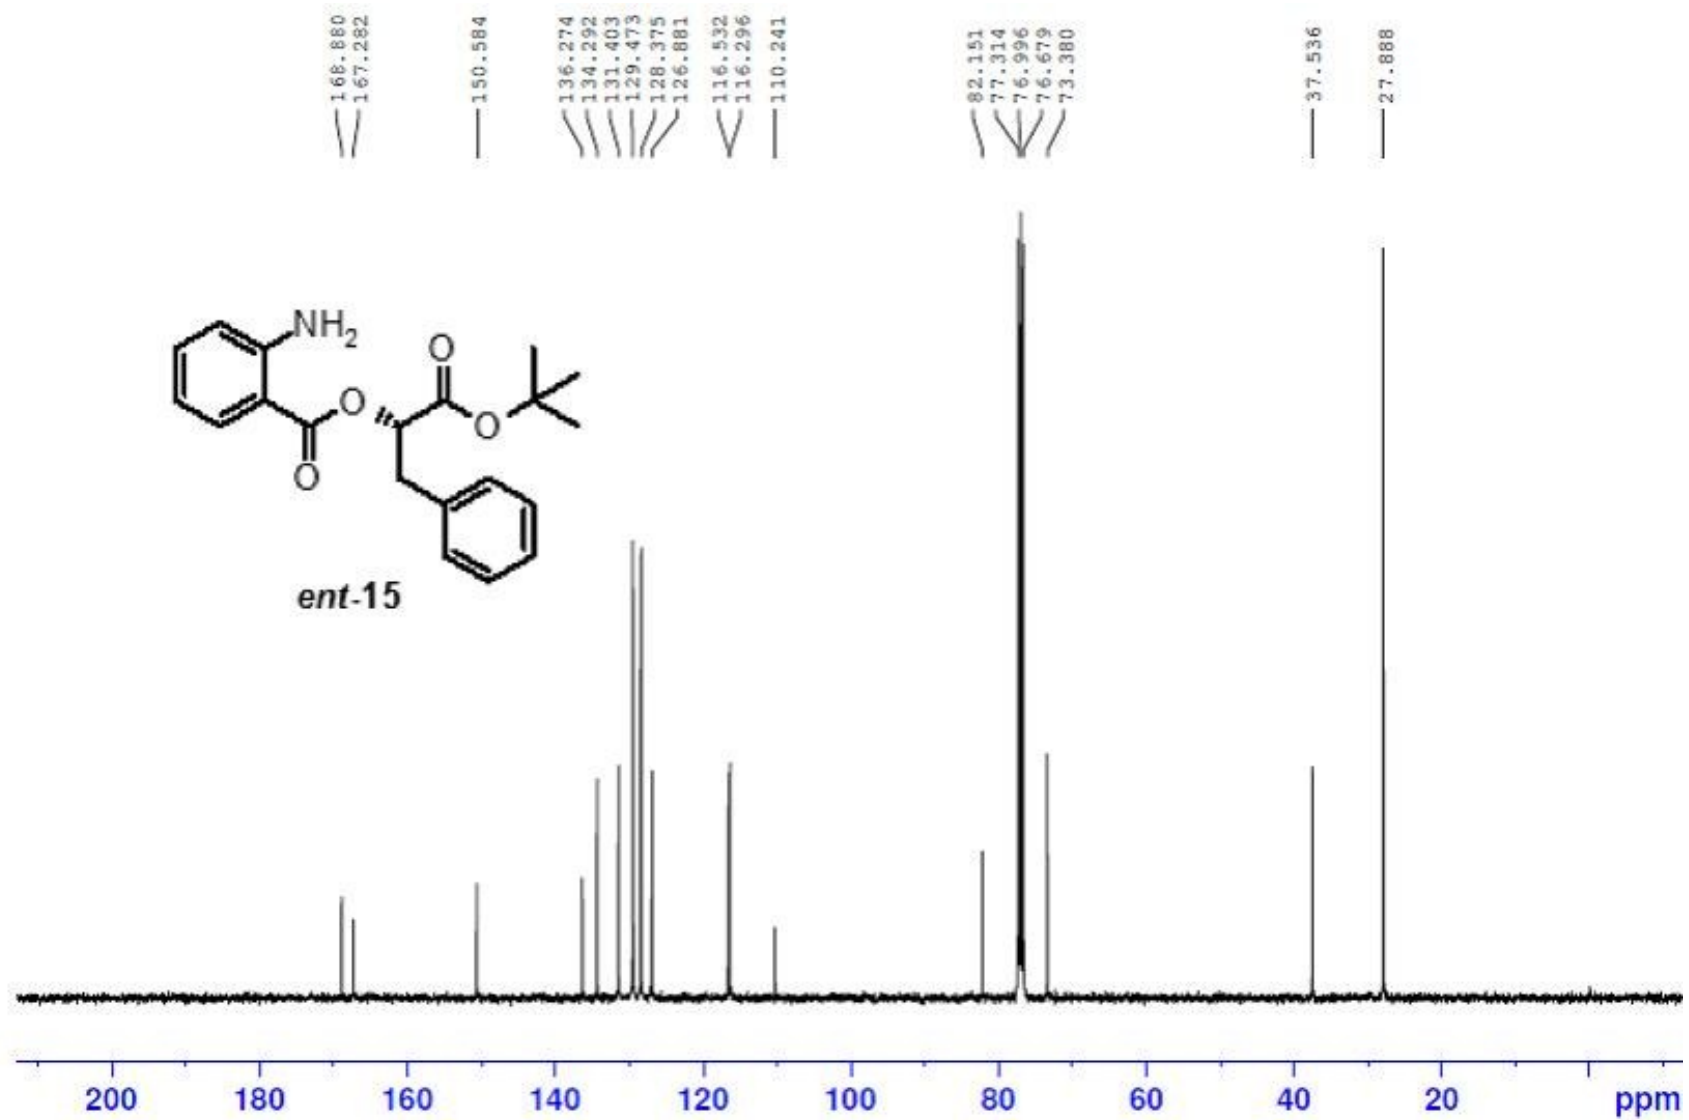

## Racemic of compound 15 and *ent*-15

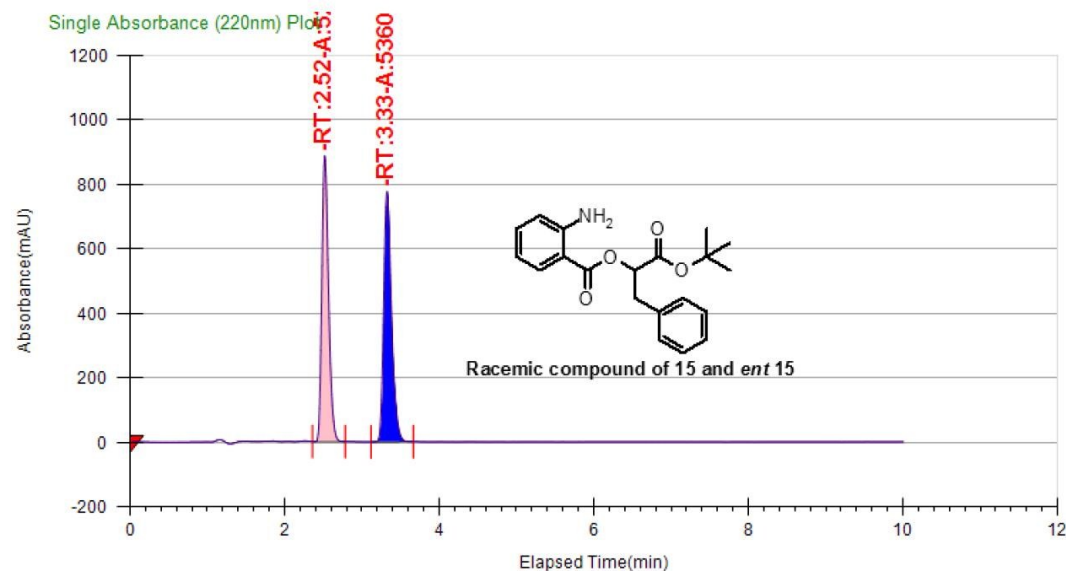

### General Information

| Log Author    | Log Date                | Report By     | Report Date | Notes |
|---------------|-------------------------|---------------|-------------|-------|
| Administrator | 5/10/2015<br>8:03:49 AM | Administrator | 5/11/2015   |       |

### Run Information

| Instrument Method | Inj. Vol. | Solvent                 | Column                              | Sample                        | Well Location | Temp. | Flow | % Modifier | Pressure |
|-------------------|-----------|-------------------------|-------------------------------------|-------------------------------|---------------|-------|------|------------|----------|
| 3g-20%-100bar     | 7         | 0.5% DEA in<br>METHANOL | Chiralcel OJ-<br>H(4.6*250)<br>mm5u | GVKP-SK-<br>B1329-112-<br>RAC | 26C           | 30.3  | 3    | 20         | 100      |

### Peak Information

| Peak No | % Area  | Area      | Ret. Time | Height   | Cap. Factor |
|---------|---------|-----------|-----------|----------|-------------|
| 1       | 49.3211 | 5216.6826 | 2.52 min  | 886.8991 | 0           |
| 2       | 50.6789 | 5360.3012 | 3.33 min  | 776.8026 | 0           |

## Chiral HPLC of Compound 15

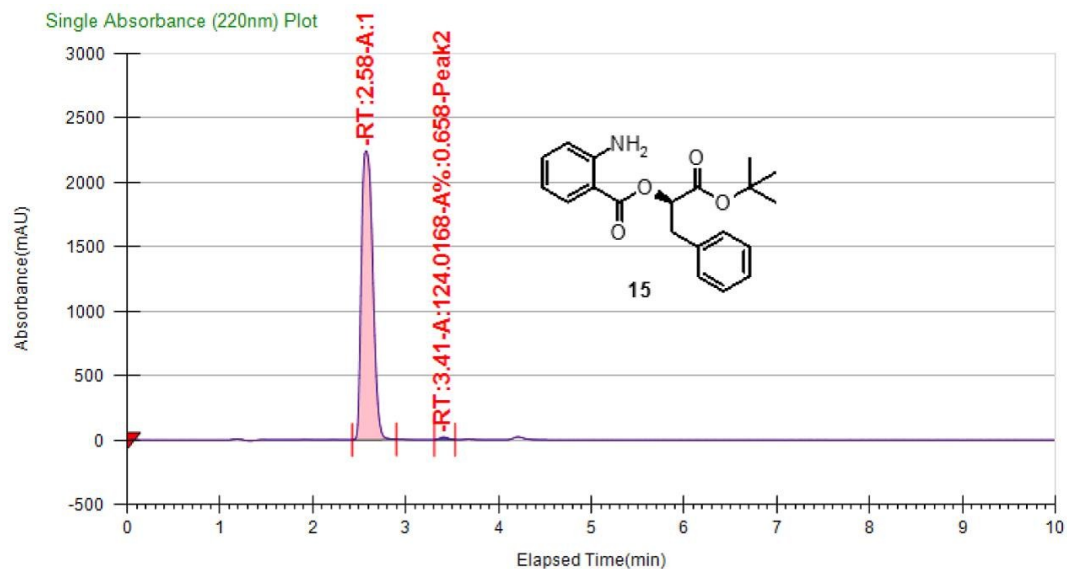

### General Information

| Log Author    | Log Date                | Report By     | Report Date | Notes |
|---------------|-------------------------|---------------|-------------|-------|
| Administrator | 5/10/2015<br>8:28:31 AM | Administrator | 5/11/2015   |       |

### Run Information

| Instrument Method | Inj. Vol. | Solvent                 | Column                              | Sample               | Well Location | Temp. | Flow | % Modifier | Pressure |
|-------------------|-----------|-------------------------|-------------------------------------|----------------------|---------------|-------|------|------------|----------|
| 3g-20%-100bar     | 7         | 0.5% DEA in<br>METHANOL | Chiralcel OJ-<br>H(4.6*250)<br>mm5u | GVKP-SK-<br>B1329-82 | 28C           | 30    | 3    | 20         | 100      |

### Peak Information

| Peak No | % Area | Area       | Ret. Time | Height    | Cap. Factor |
|---------|--------|------------|-----------|-----------|-------------|
| 1       | 99.342 | 18723.7264 | 2.58 min  | 2242.0352 | 2574        |
| 2       | 0.658  | 124.0168   | 3.41 min  | 20.5891   | 3407.35     |

## Chiral HPLC of Compound *ent*-15

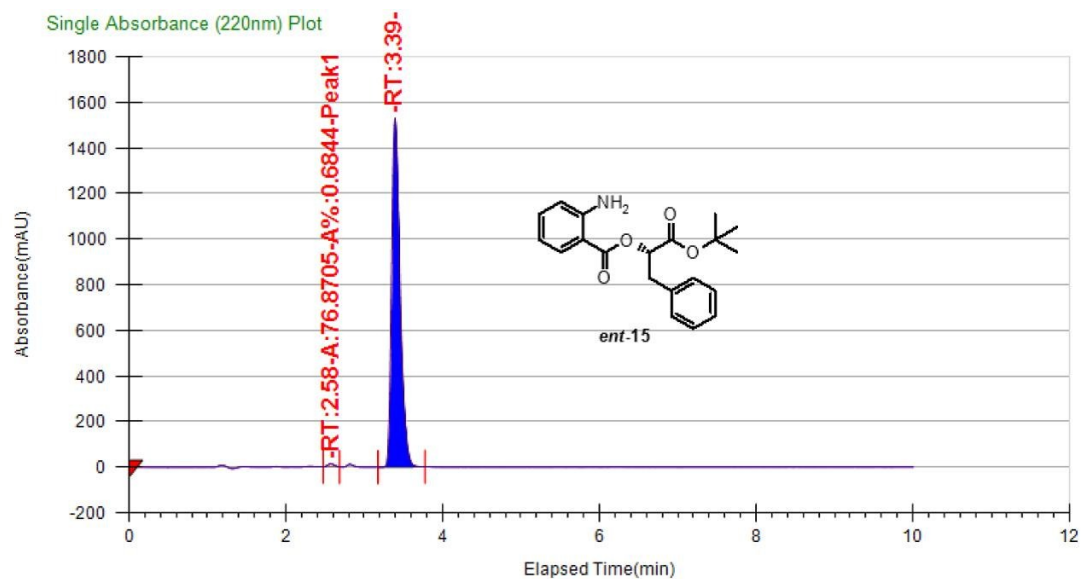

### General Information

| Log Author    | Log Date                | Report By     | Report Date | Notes |
|---------------|-------------------------|---------------|-------------|-------|
| Administrator | 5/10/2015<br>8:17:04 AM | Administrator | 5/11/2015   |       |

### Run Information

| Instrument Method | Inj. Vol. | Solvent                 | Column                              | Sample               | Well Location | Temp. | Flow | % Modifier | Pressure |
|-------------------|-----------|-------------------------|-------------------------------------|----------------------|---------------|-------|------|------------|----------|
| 3g-20%-100bar     | 7         | 0.5% DEA in<br>METHANOL | Chiralcel OJ-<br>H(4.6*250)<br>mm5u | GVKP-SK-<br>B1329-64 | 27C           | 30    | 3    | 20         | 100      |

### Peak Information

| Peak No | % Area  | Area       | Ret. Time | Height    | Cap. Factor |
|---------|---------|------------|-----------|-----------|-------------|
| 1       | 0.6844  | 76.8705    | 2.58 min  | 13.8241   | 2574        |
| 2       | 99.3156 | 11154.6875 | 3.39 min  | 1528.4667 | 3390.6833   |



<sup>1</sup>H NMR of Compound 16 in CDCl<sub>3</sub>

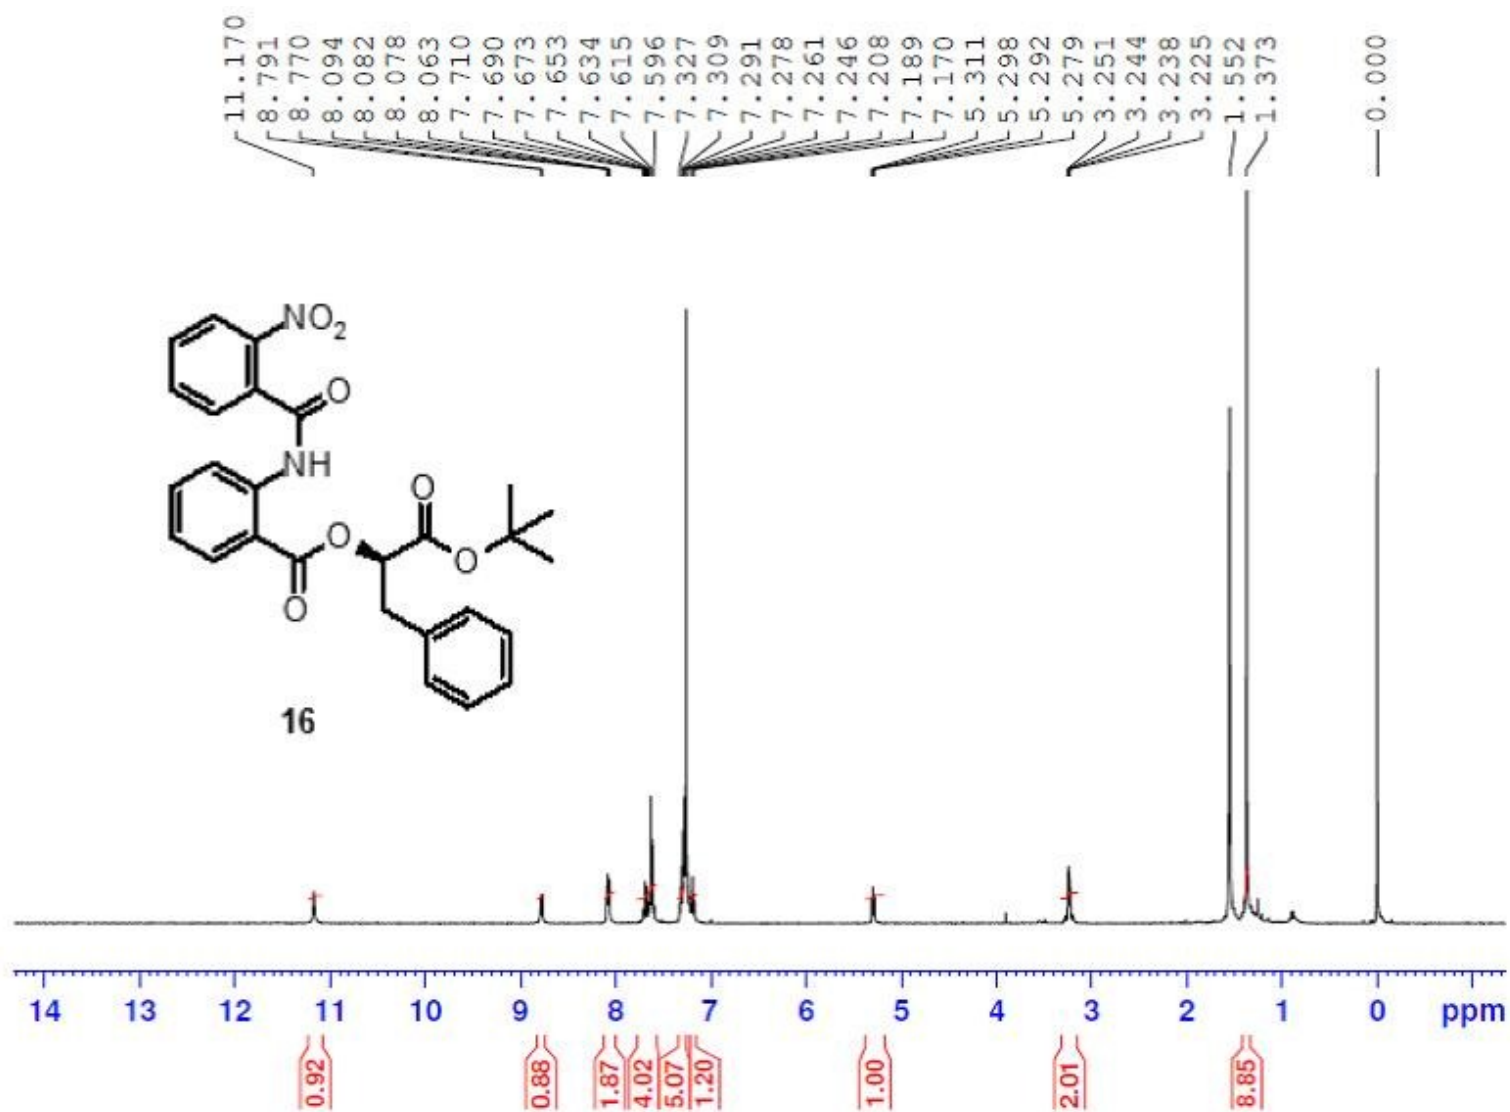

### $^{13}\text{C}$ NMR of Compound 16 in $\text{CDCl}_3$

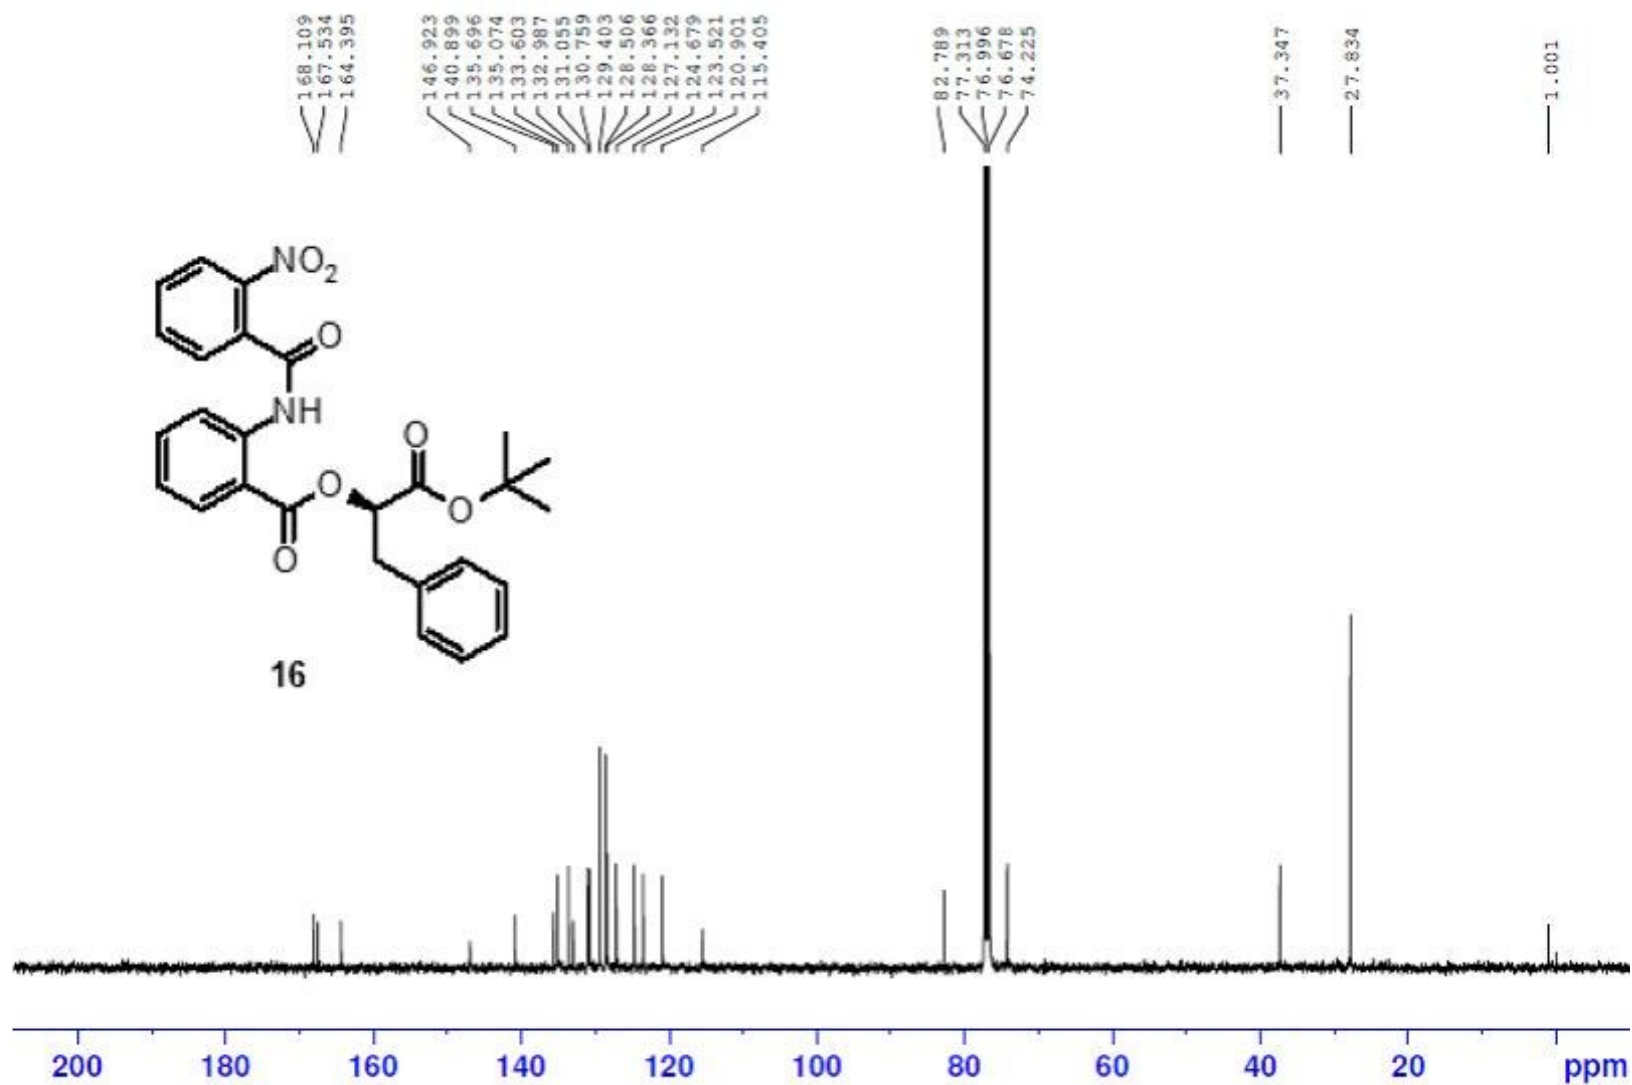

<sup>1</sup>H NMR of Compound *ent*-16 in CDCl<sub>3</sub>

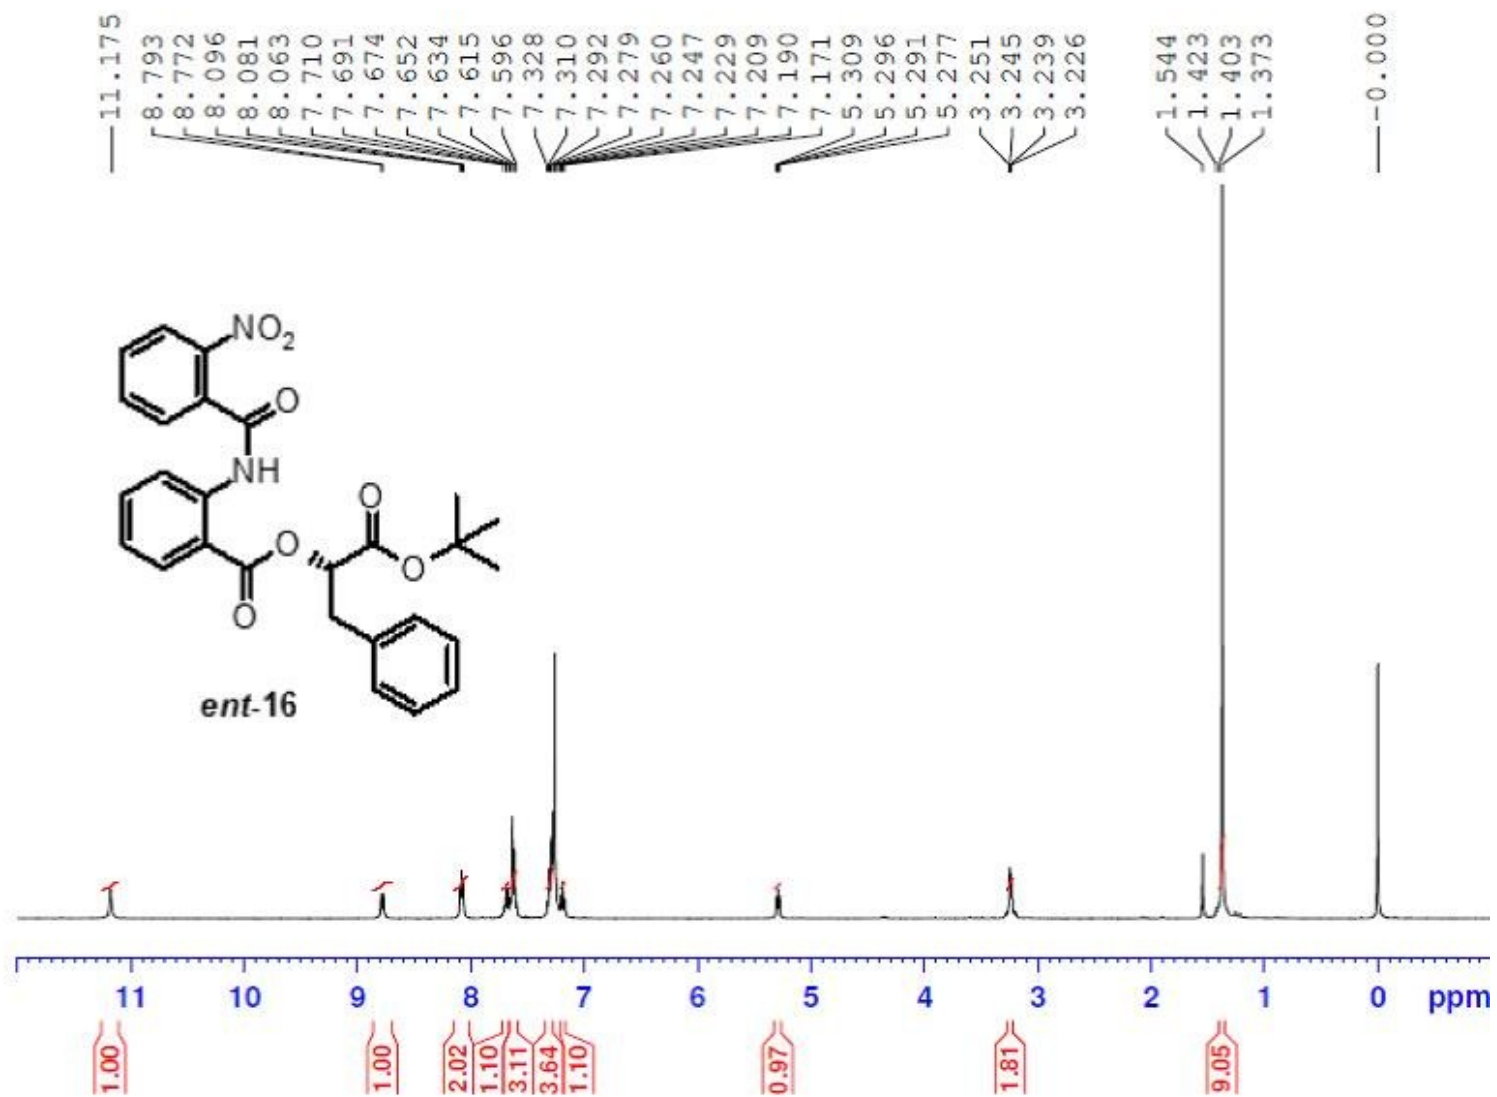

<sup>13</sup>C NMR of Compound *ent*-16 in CDCl<sub>3</sub>

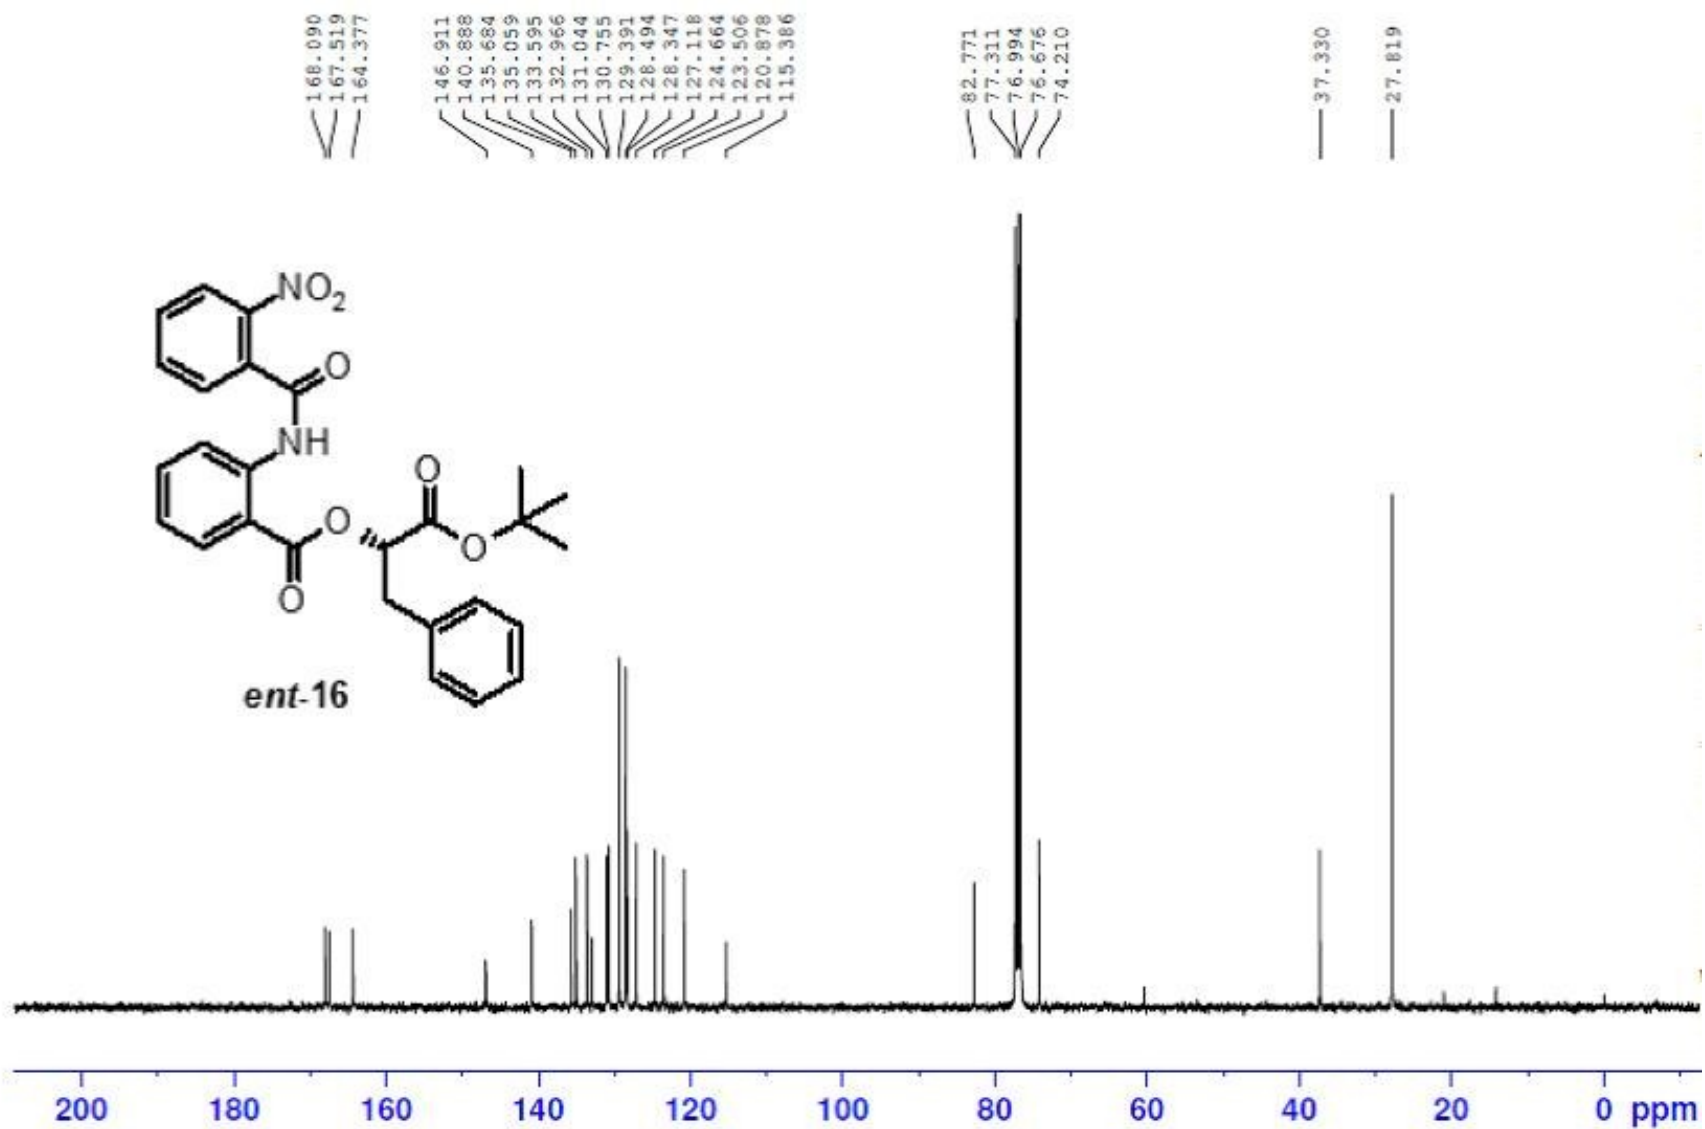

## Racemic of compound 16 and *ent*-16

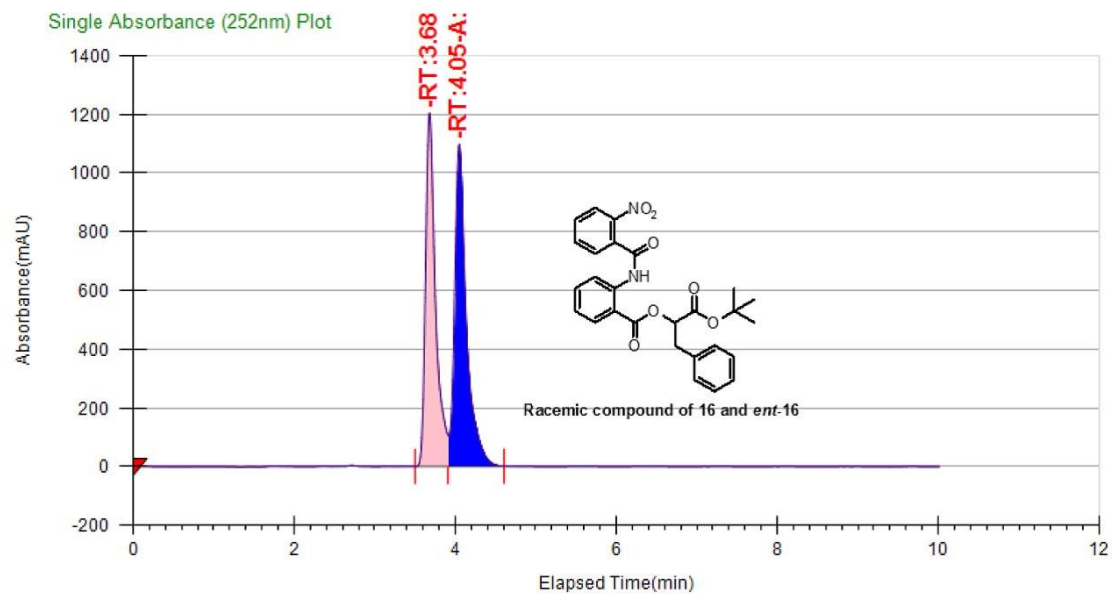

### General Information

| Log Author    | Log Date                 | Report By     | Report Date | Notes |
|---------------|--------------------------|---------------|-------------|-------|
| Administrator | 5/11/2015<br>11:27:05 PM | Administrator | 5/12/2015   |       |

### Run Information

| Instrument Method | Inj. Vol. | Solvent                 | Column                              | Sample                        | Well Location | Temp. | Flow  | % Modifier | Pressure |
|-------------------|-----------|-------------------------|-------------------------------------|-------------------------------|---------------|-------|-------|------------|----------|
| 3g-30%-100bar     | 5         | 0.5% DEA in<br>METHANOL | Chiralcel OD-<br>H(4.6*250)<br>mm5u | GVKP-SK-<br>B1329-113-<br>Rac | 14B           | 30.1  | 2.999 | 29.9767    | 100      |

### Peak Information

| Peak No | % Area  | Area       | Ret. Time | Height    | Cap. Factor |
|---------|---------|------------|-----------|-----------|-------------|
| 1       | 48.1041 | 10218.8976 | 3.68 min  | 1202.6786 | 0           |
| 2       | 51.8959 | 11024.4167 | 4.05 min  | 1097.5249 | 0           |

## Chiral HPLC of Compound 16

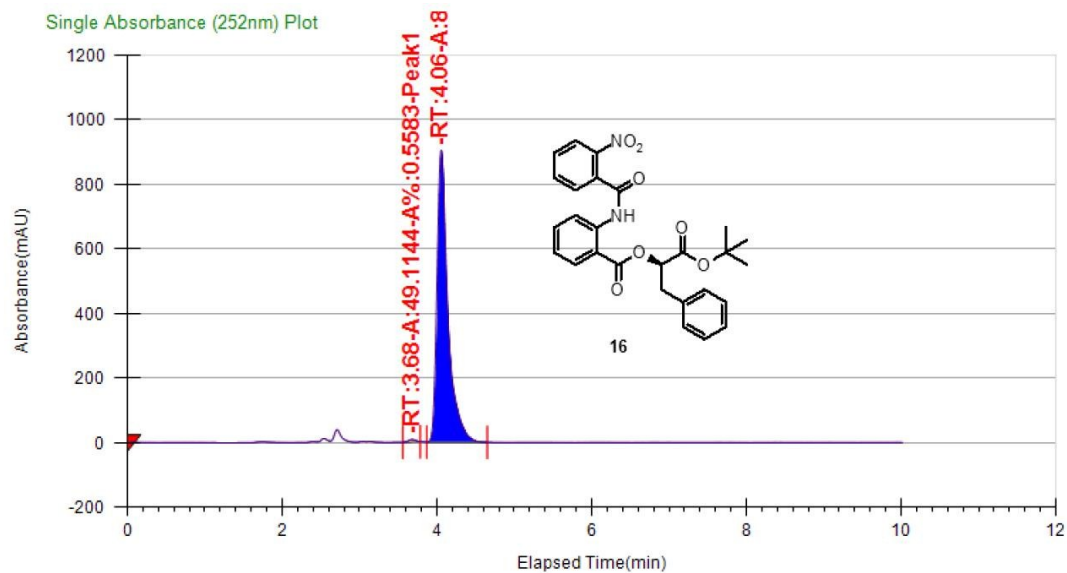

### General Information

| Log Author    | Log Date                 | Report By     | Report Date | Notes |
|---------------|--------------------------|---------------|-------------|-------|
| Administrator | 5/11/2015<br>11:38:24 PM | Administrator | 5/12/2015   |       |

### Run Information

| Instrument Method | Inj. Vol. | Solvent                 | Column                              | Sample               | Well Location | Temp. | Flow  | % Modifier | Pressure |
|-------------------|-----------|-------------------------|-------------------------------------|----------------------|---------------|-------|-------|------------|----------|
| 3g-30%-100bar     | 5         | 0.5% DEA in<br>METHANOL | Chiralcel OD-<br>H(4,6*250)<br>mm5u | GVKP-SK-<br>B1329-83 | 16B           | 30    | 2.999 | 29.9767    | 100      |

### Peak Information

| Peak No | % Area  | Area      | Ret. Time | Height   | Cap. Factor |
|---------|---------|-----------|-----------|----------|-------------|
| 1       | 0.5583  | 49.1144   | 3.68 min  | 7.7594   | 0           |
| 2       | 99.4417 | 8748.0234 | 4.06 min  | 904.2011 | 0           |

## Chiral HPLC of Compound *ent*-16

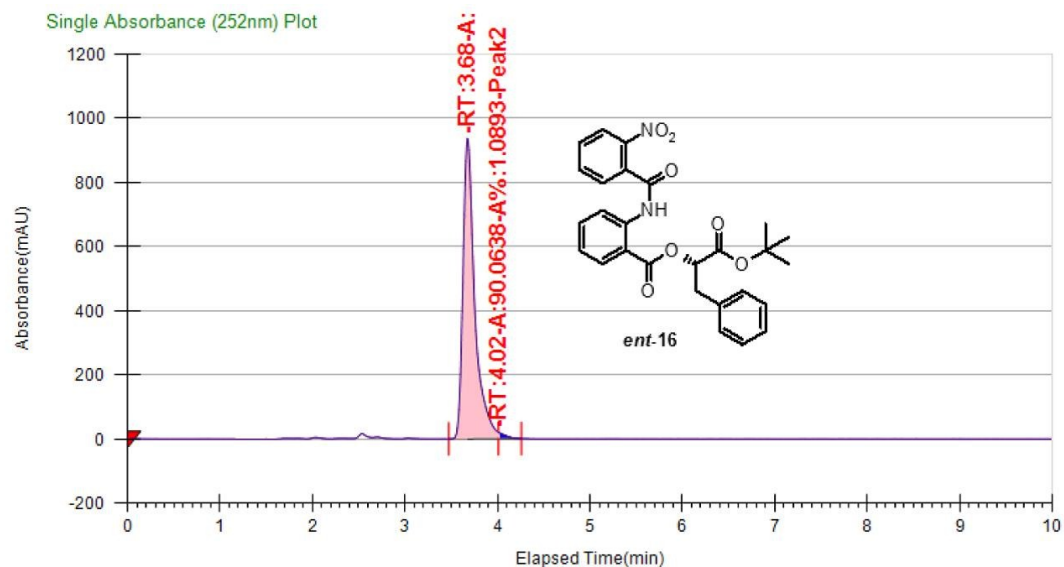

### General Information

| Log Author    | Log Date                 | Report By     | Report Date | Notes |
|---------------|--------------------------|---------------|-------------|-------|
| Administrator | 5/11/2015<br>11:49:44 PM | Administrator | 5/12/2015   |       |

### Run Information

| Instrument Method | Inj. Vol. | Solvent                 | Column                              | Sample               | Well Location | Temp. | Flow  | % Modifier | Pressure |
|-------------------|-----------|-------------------------|-------------------------------------|----------------------|---------------|-------|-------|------------|----------|
| 3g-30%-100bar     | 5         | 0.5% DEA in<br>METHANOL | Chiralcel OD-<br>H(4.6*250)<br>mm5u | GVKP-SK-<br>B1329-65 | 15B           | 30.1  | 2.999 | 29.9767    | 100      |

### Peak Information

| Peak No | % Area  | Area      | Ret. Time | Height   | Cap. Factor |
|---------|---------|-----------|-----------|----------|-------------|
| 1       | 98.9107 | 8178.0594 | 3.68 min  | 937.3977 | 0           |
| 2       | 1.0893  | 90.0638   | 4.02 min  | 19.1097  | 0           |

# <sup>1</sup>H NMR of Compound 17 in CDCl<sub>3</sub>

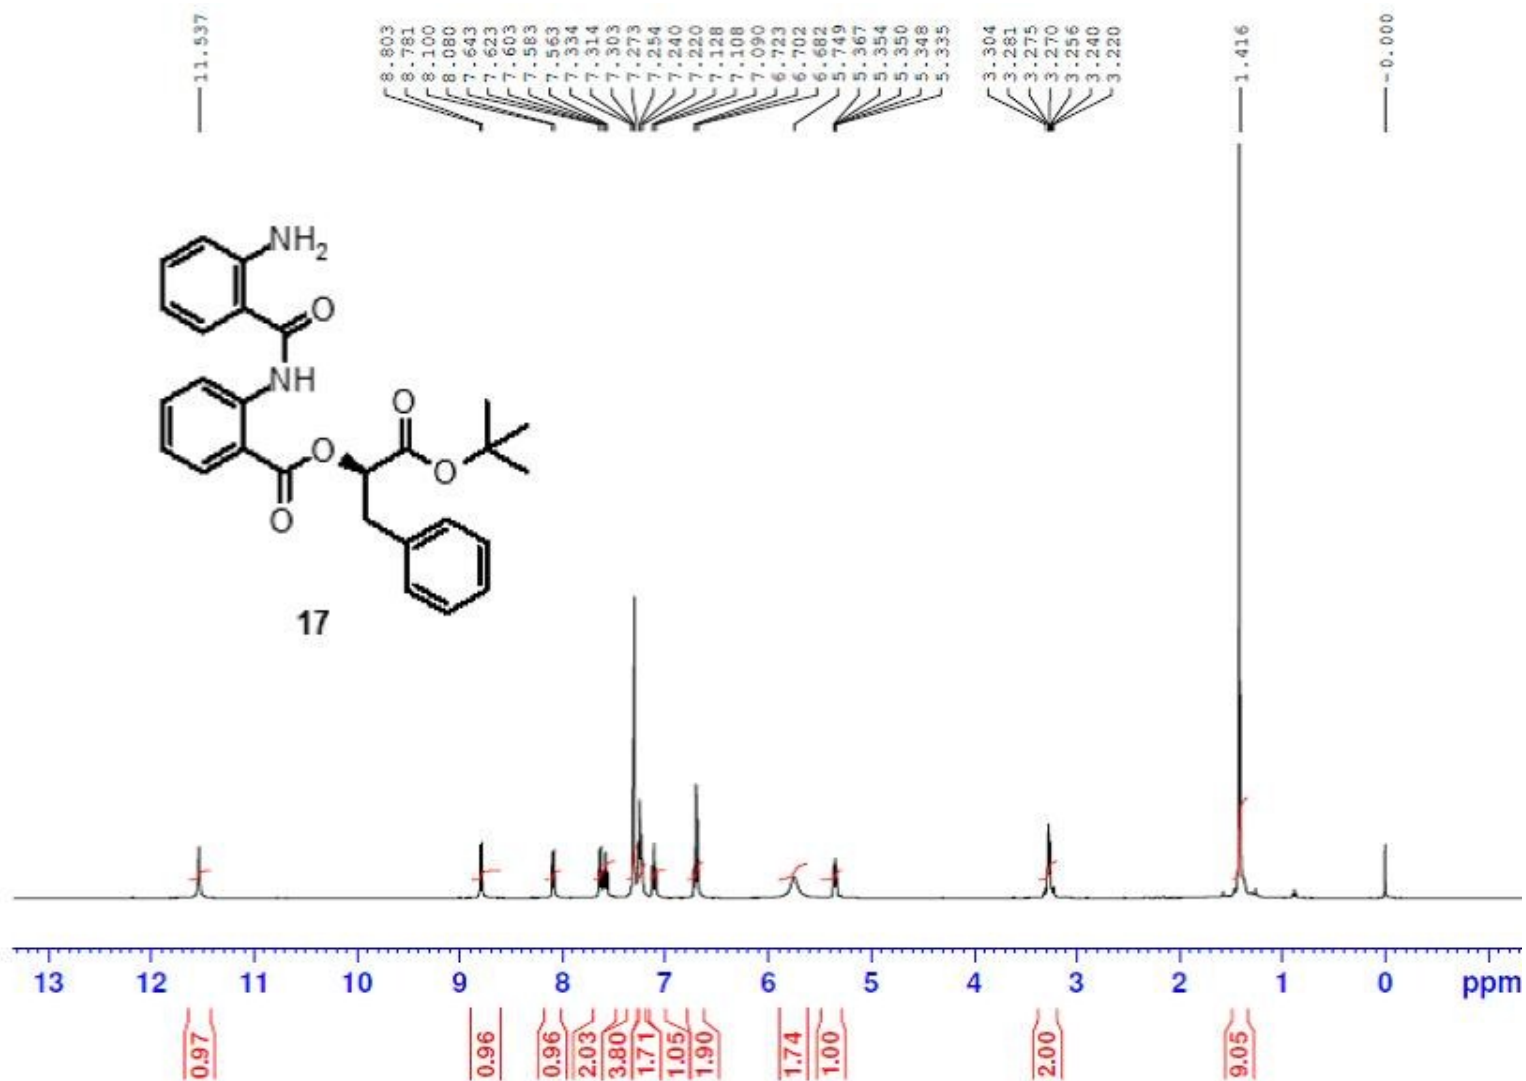



**$^{13}\text{C}$  NMR of Compound 17 in  $\text{CDCl}_3$**

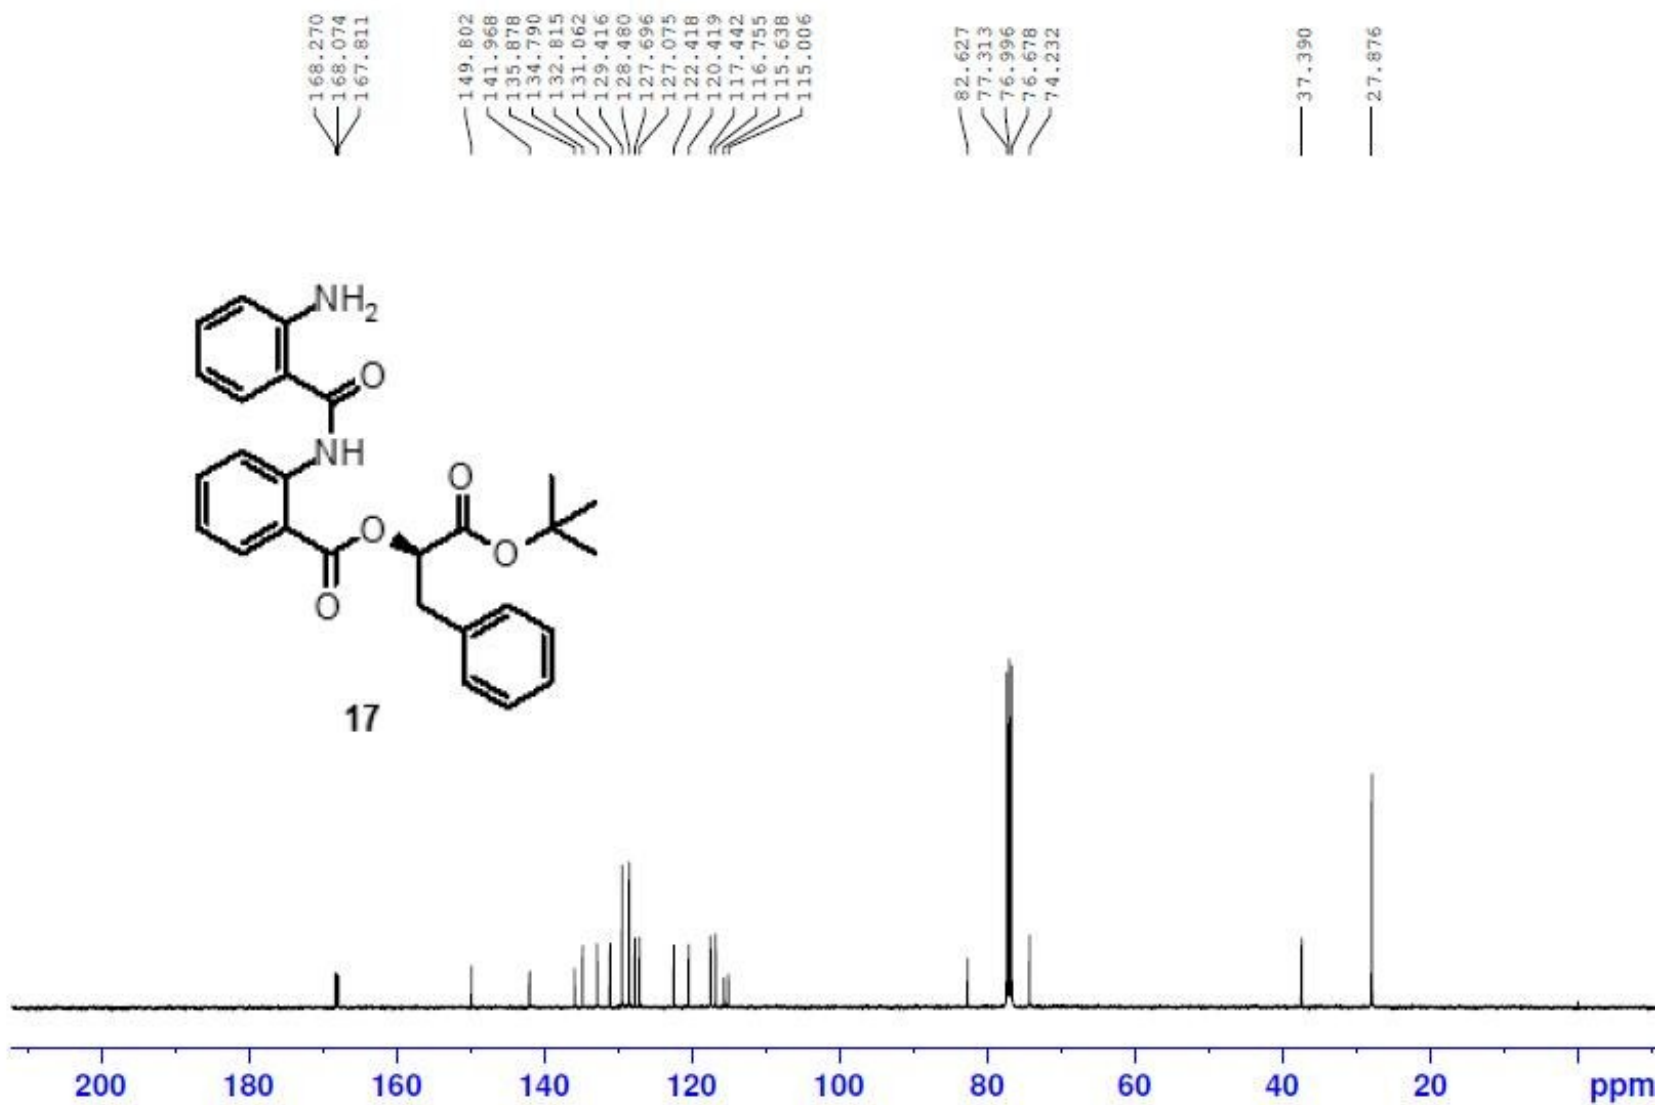

<sup>1</sup>H NMR of Compound *ent-17* in CDCl<sub>3</sub>

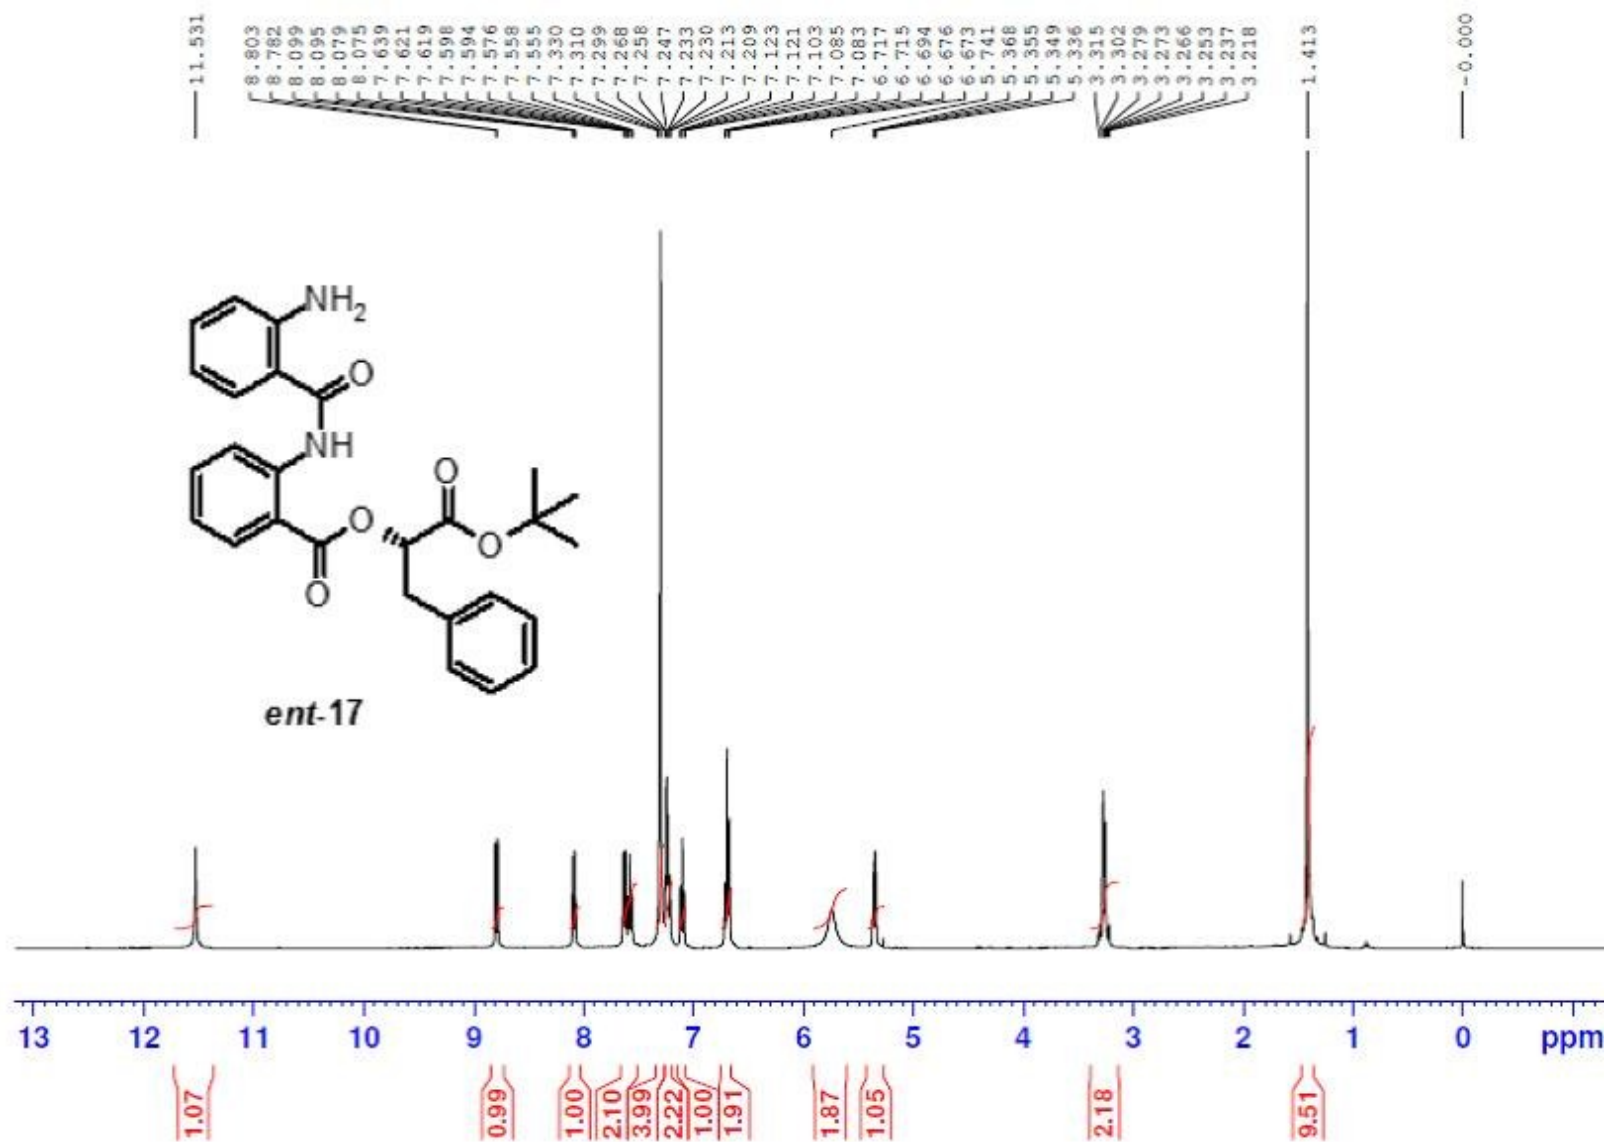

**<sup>13</sup>C NMR of Compound *ent*-17 in CDCl<sub>3</sub>**

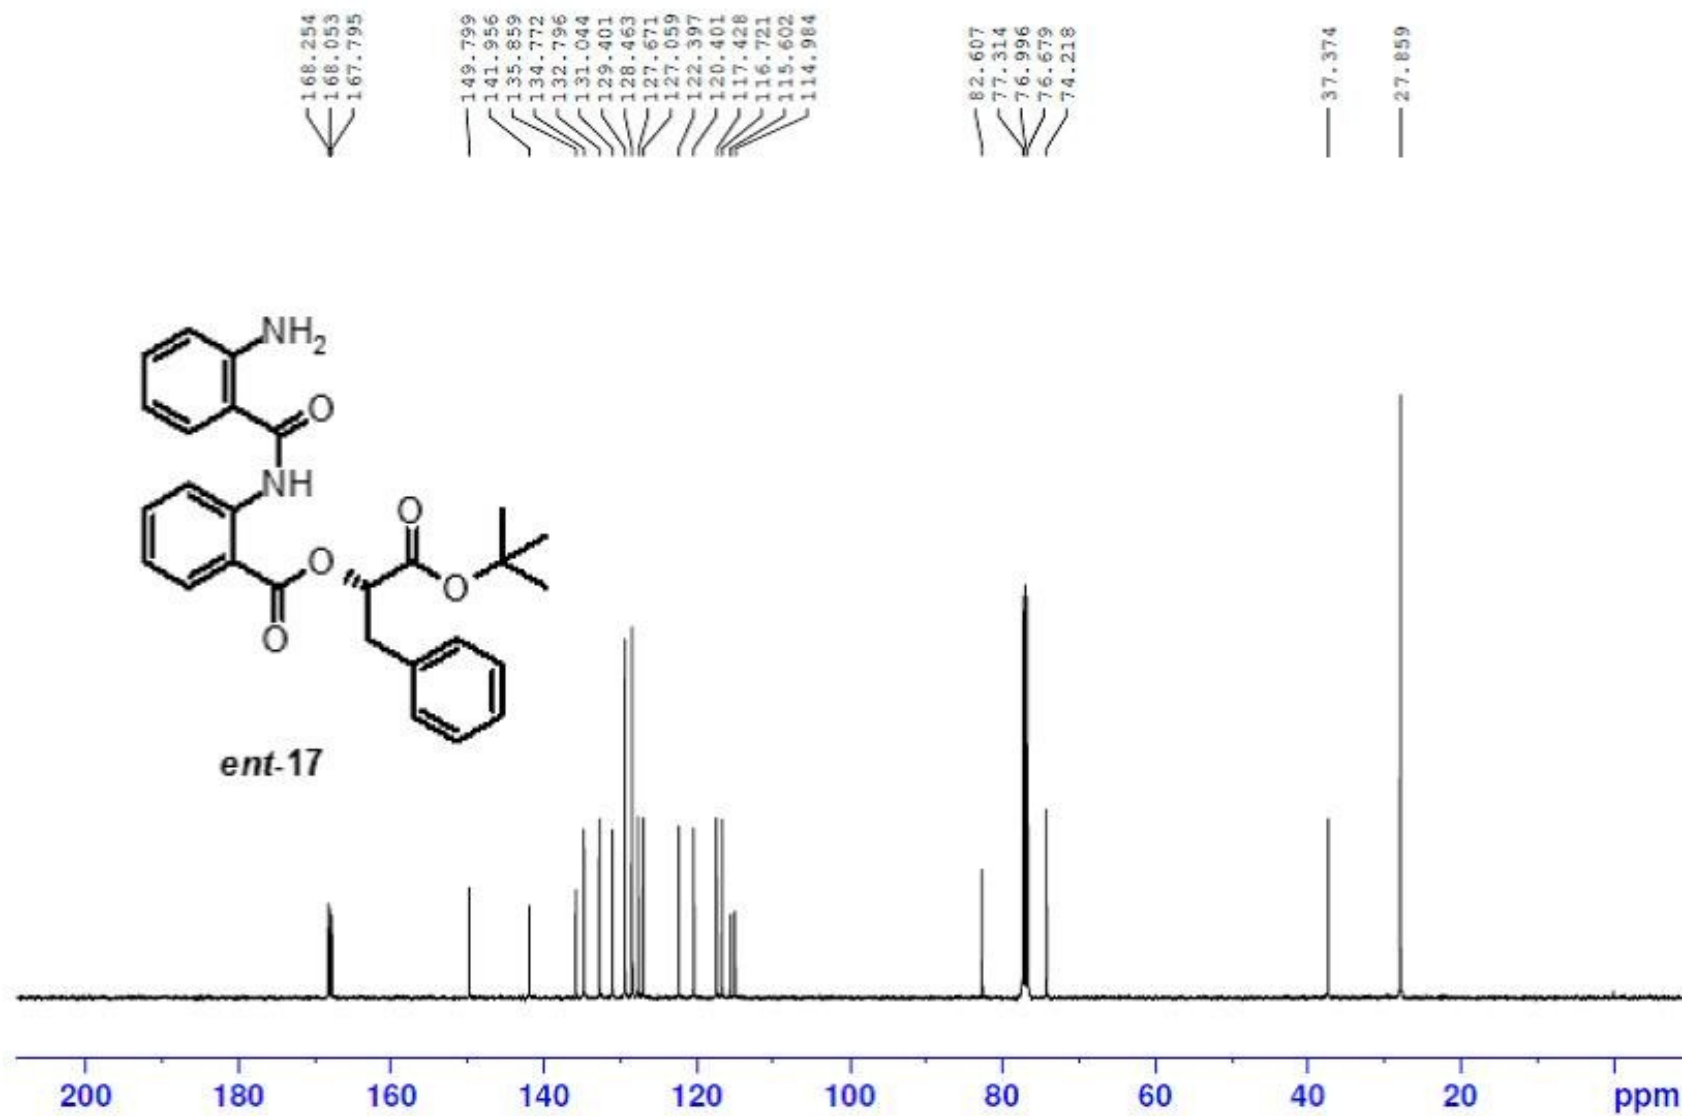

## Racemic of compound 17 and *ent*-17

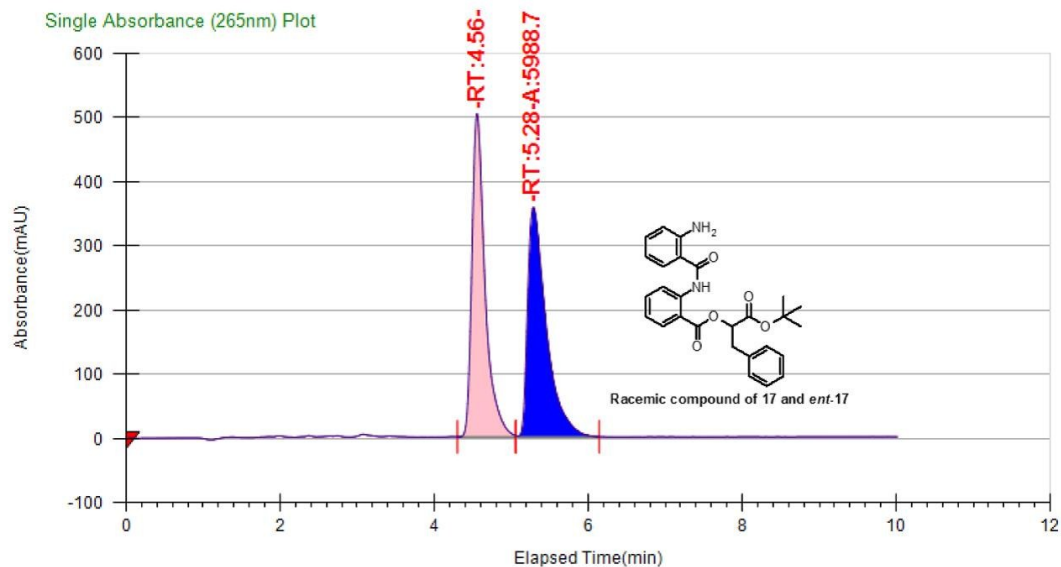

### General Information

| Log Author    | Log Date                | Report By     | Report Date | Notes |
|---------------|-------------------------|---------------|-------------|-------|
| Administrator | 5/13/2015<br>1:45:16 PM | Administrator | 5/13/2015   |       |

### Run Information

| Instrument Method | Inj. Vol. | Solvent                 | Column                              | Sample                        | Well Location | Temp. | Flow | % Modifier | Pressure |
|-------------------|-----------|-------------------------|-------------------------------------|-------------------------------|---------------|-------|------|------------|----------|
| 4g-40%-100bar     | 10        | 0.5% DEA in<br>METHANOL | Chiralcel OD-<br>H(4.6*250)<br>mm5u | GVKP-SK-<br>B1329-114-<br>Rac | 25A           | 29.7  | 4    | 40         | 100      |

### Peak Information

| Peak No | % Area  | Area      | Ret. Time | Height   | Cap. Factor |
|---------|---------|-----------|-----------|----------|-------------|
| 1       | 49.6581 | 5907.3868 | 4.56 min  | 503.8947 | 4557.35     |
| 2       | 50.3419 | 5988.7235 | 5.28 min  | 357.6203 | 5282.3333   |

## Chiral HPLC of Compound 17

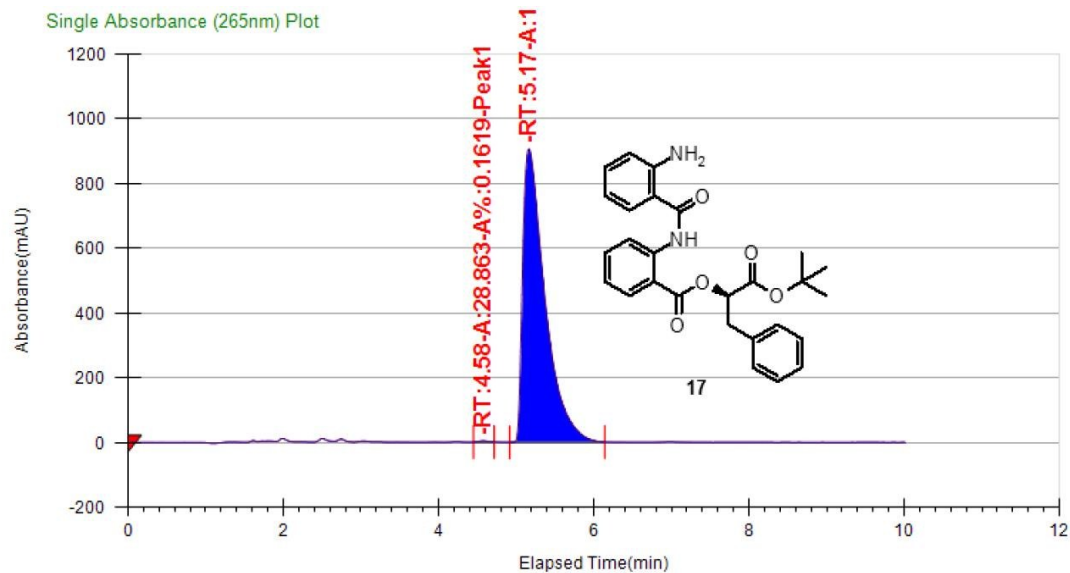

### General Information

| Log Author    | Log Date                | Report By     | Report Date | Notes |
|---------------|-------------------------|---------------|-------------|-------|
| Administrator | 5/13/2015<br>2:07:51 PM | Administrator | 5/13/2015   |       |

### Run Information

| Instrument Method | Inj. Vol. | Solvent                 | Column                              | Sample                | Well Location | Temp. | Flow | % Modifier | Pressure |
|-------------------|-----------|-------------------------|-------------------------------------|-----------------------|---------------|-------|------|------------|----------|
| 4g-40%-100bar     | 10        | 0.5% DEA in<br>METHANOL | Chiralcel OD-<br>H(4.6*250)<br>mm5u | GVKP-SK-<br>B1329-83C | 27A           | 29.9  | 4    | 40         | 100      |

### Peak Information

| Peak No | % Area  | Area       | Ret. Time | Height   | Cap. Factor |
|---------|---------|------------|-----------|----------|-------------|
| 1       | 0.1619  | 28.863     | 4.58 min  | 3.4472   | 0           |
| 2       | 99.8381 | 17794.6742 | 5.17 min  | 906.5874 | 0           |

## Chiral HPLC of Compound *ent-17*

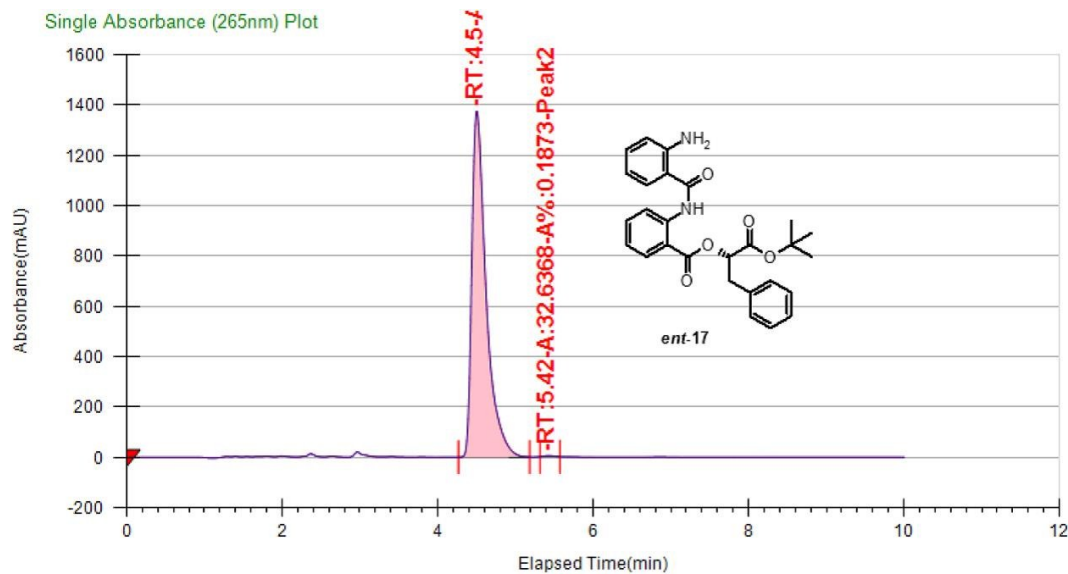

### General Information

| Log Author    | Log Date                | Report By     | Report Date | Notes |
|---------------|-------------------------|---------------|-------------|-------|
| Administrator | 5/13/2015<br>1:56:33 PM | Administrator | 5/13/2015   |       |

### Run Information

| Instrument Method | Inj. Vol. | Solvent                 | Column                              | Sample               | Well Location | Temp. | Flow | % Modifier | Pressure |
|-------------------|-----------|-------------------------|-------------------------------------|----------------------|---------------|-------|------|------------|----------|
| 4g-40%-100bar     | 10        | 0.5% DEA in<br>METHANOL | Chiralcel OD-<br>H(4.6*250)<br>mm5u | GVKP-SK-<br>B1329-66 | 26A           | 30    | 4    | 40         | 100      |

### Peak Information

| Peak No | % Area  | Area       | Ret. Time | Height    | Cap. Factor |
|---------|---------|------------|-----------|-----------|-------------|
| 1       | 99.8127 | 17389.4614 | 4.5 min   | 1374.4524 | 4499.0167   |
| 2       | 0.1873  | 32.6368    | 5.42 min  | 3.7678    | 5424        |

<sup>1</sup>H NMR of Compound 11 in CDCl<sub>3</sub>

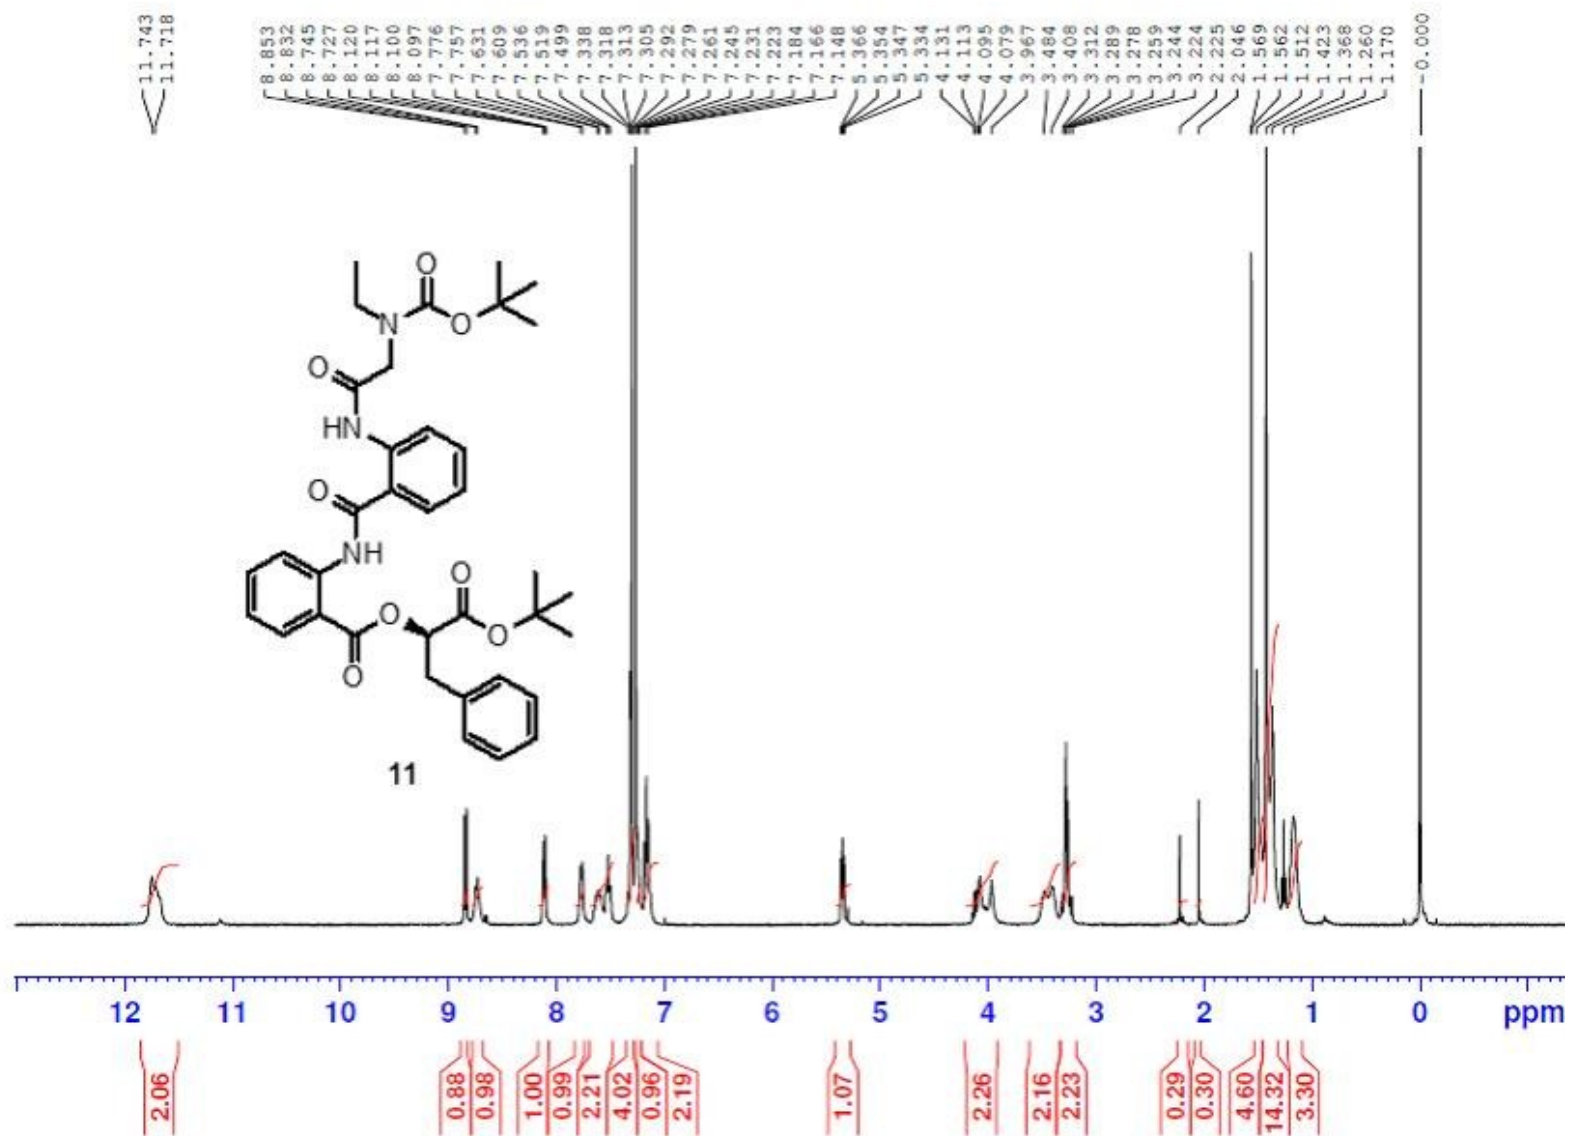

# VT <sup>1</sup>H NMR of Compound 11 in DMSO-d<sub>6</sub>

GVKP-SK-B1329-90-R-VT AT 90C

Solvent: dmsO

400-MR/NRM-1/NMR-001

Date: Jun 13 2015

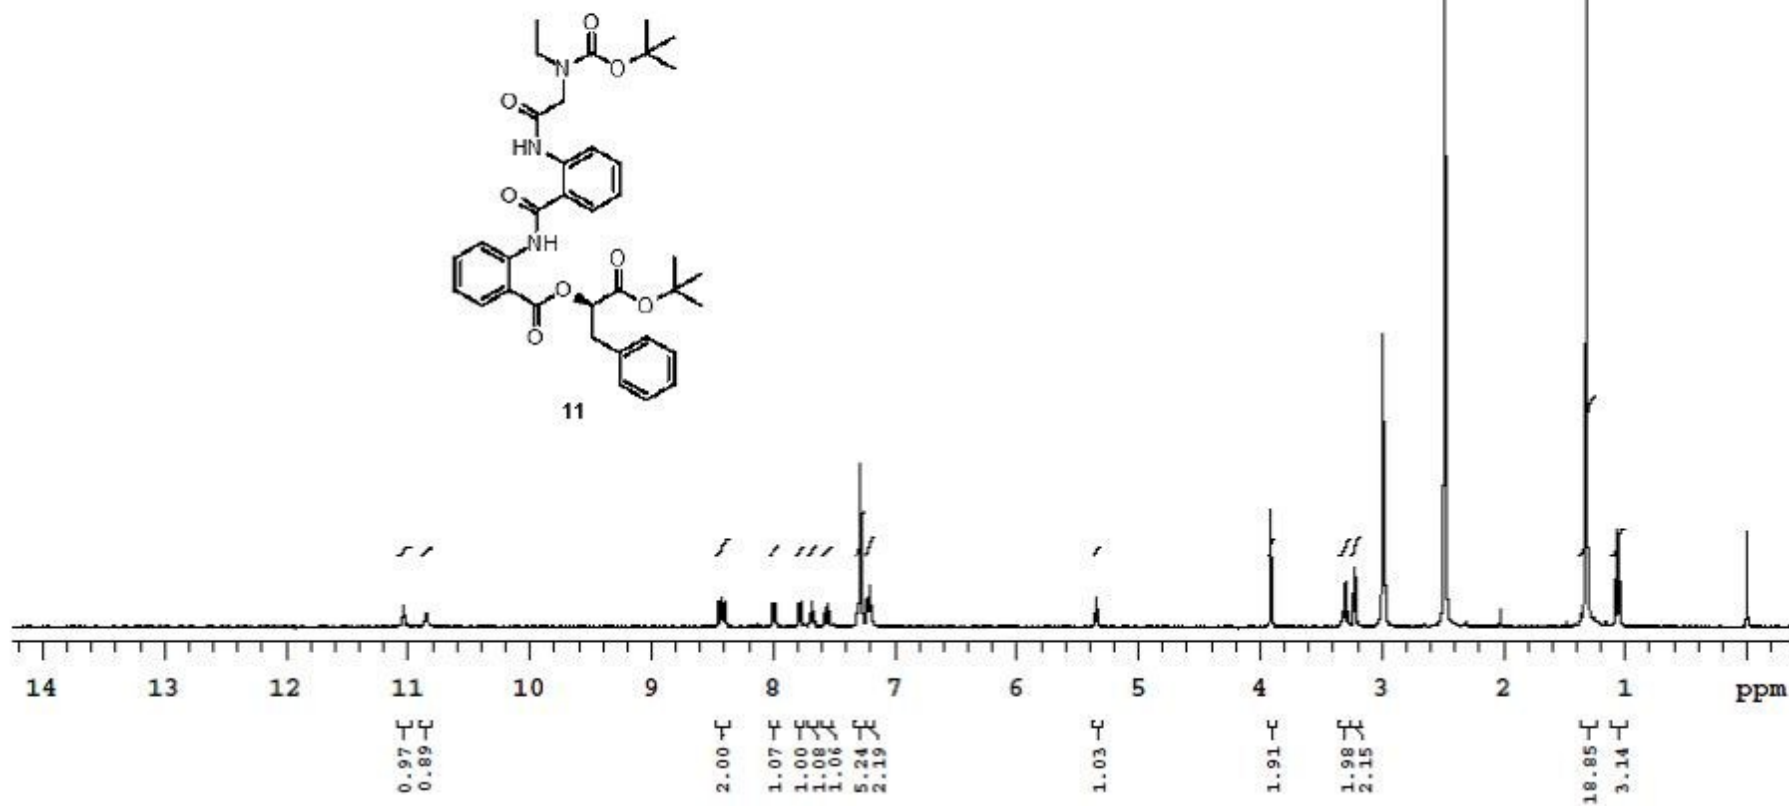



**<sup>1</sup>H NMR of Compound-11 in CDCl<sub>3</sub>**

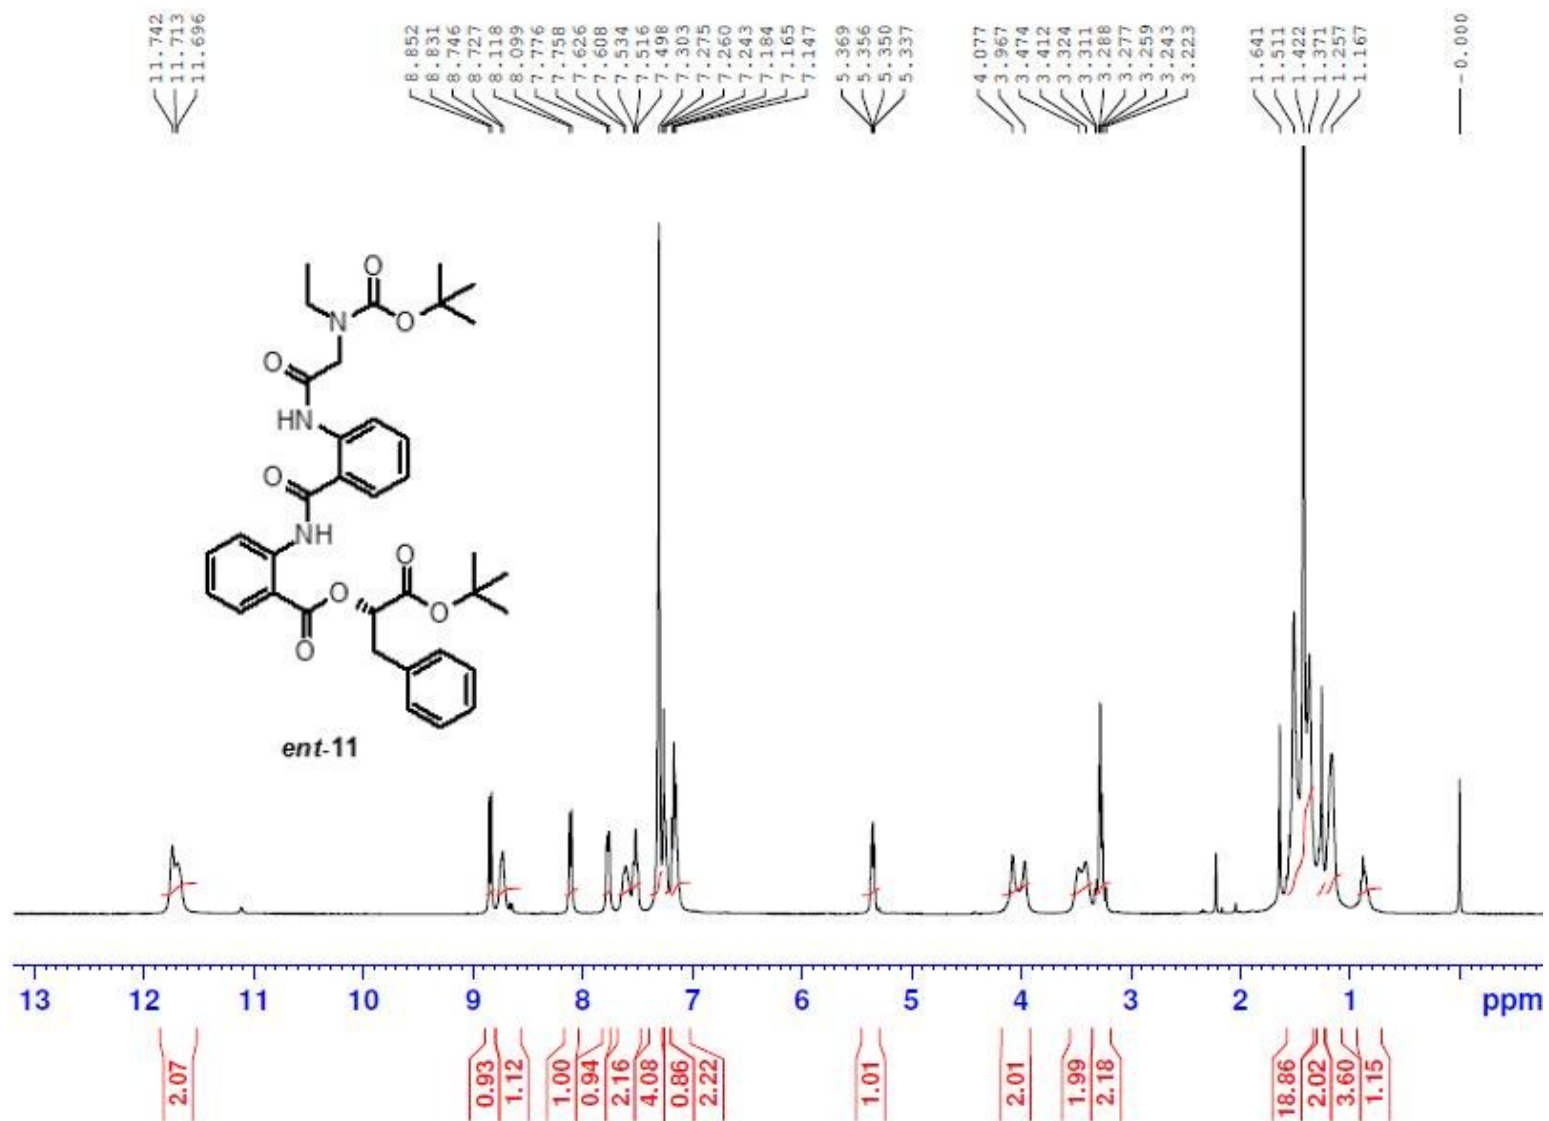

# VT <sup>1</sup>H NMR of Compound *ent-11* in DMSO-d<sub>6</sub>

GVKP-SK-B1329-70-S-VT AT 90C

Solvent: dmsO

400-MR/NRM-1/NMR-001

Date: Jun 13 2015

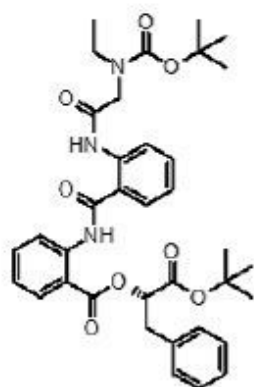

*ent-11*

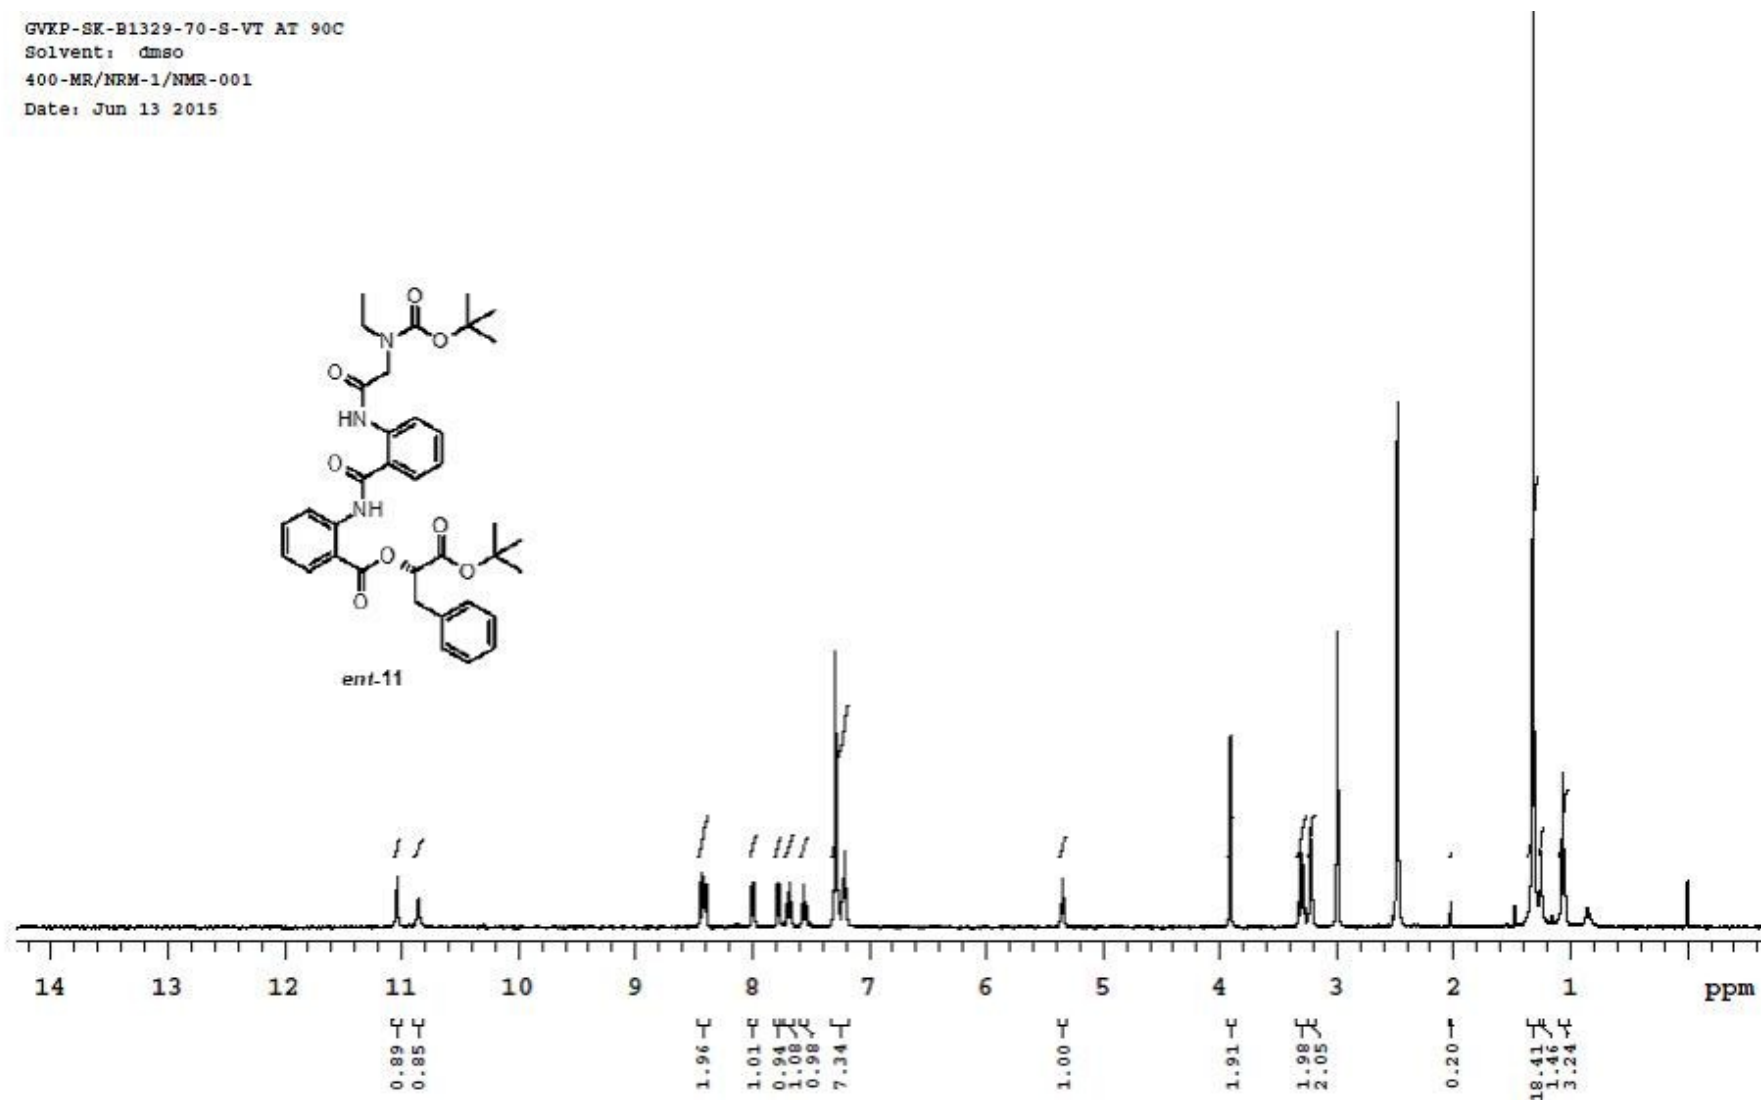

## Racemic of compound 11 and *ent*-11

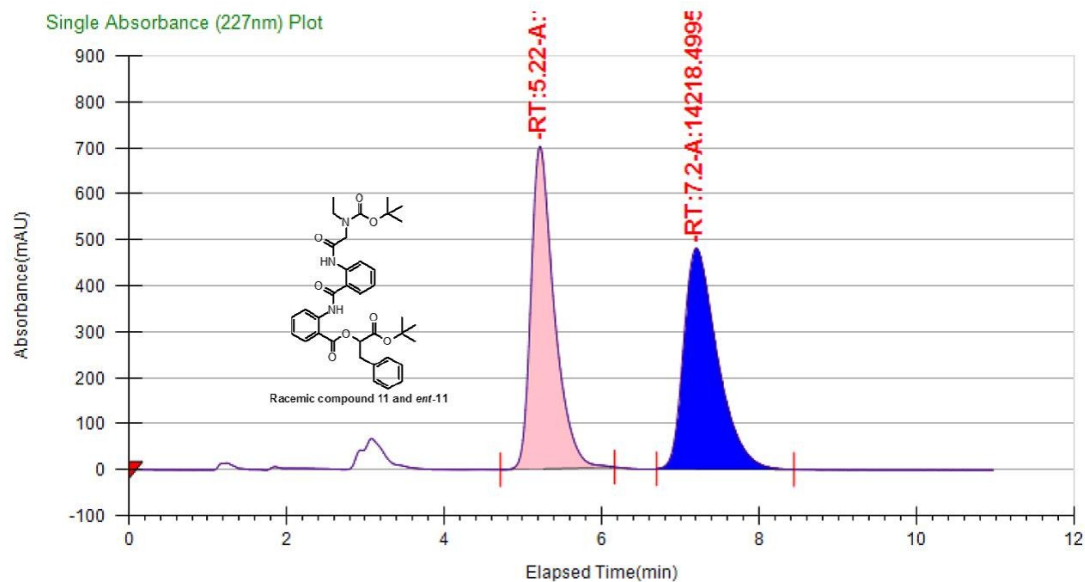

### General Information

| Log Author    | Log Date            | Report By     | Report Date | Notes |
|---------------|---------------------|---------------|-------------|-------|
| Administrator | 6/4/2015 7:10:20 PM | Administrator | 6/4/2015    |       |

### Run Information

| Instrument Method | Inj. Vol. | Solvent              | Column                      | Sample                | Well Location | Temp. | Flow  | % Modifier | Pressure |
|-------------------|-----------|----------------------|-----------------------------|-----------------------|---------------|-------|-------|------------|----------|
| 3g-40%-100bar     | 10        | 0.5% DEA in METHANOL | Chiralpak-IC (4.6*250) mm5u | GVKP-SK-B1329-118-Rac | 24B           | 29.2  | 2.999 | 40.0133    | 100      |

### Peak Information

| Peak No | % Area  | Area       | Ret. Time | Height   | Cap. Factor |
|---------|---------|------------|-----------|----------|-------------|
| 1       | 50.1134 | 14283.1321 | 5.22 min  | 701.4833 | 0           |
| 2       | 49.8866 | 14218.4995 | 7.2 min   | 480.3908 | 0           |

## Chiral HPLC of Compound 11

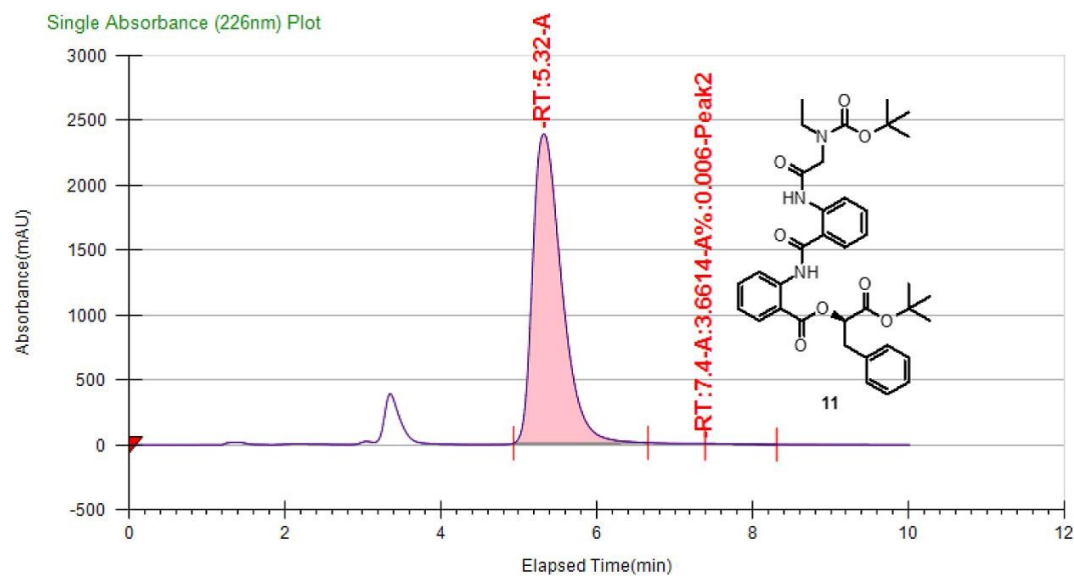

### General Information

| Log Author    | Log Date                | Report By     | Report Date | Notes |
|---------------|-------------------------|---------------|-------------|-------|
| Administrator | 5/16/2015<br>2:30:22 AM | Administrator | 5/16/2015   |       |

### Run Information

| Instrument Method | Inj. Vol. | Solvent                 | Column                            | Sample               | Well Location | Temp. | Flow  | % Modifier | Pressure |
|-------------------|-----------|-------------------------|-----------------------------------|----------------------|---------------|-------|-------|------------|----------|
| 3g-40%-100bar     | 10        | 0.5% DEA in<br>METHANOL | Chiralpak-IC<br>(4.6*250)<br>mm5u | GVKP-SK-<br>B1329-90 | 16B           | 30    | 2.999 | 40.0133    | 100      |

### Peak Information

| Peak No | % Area | Area       | Ret. Time | Height    | Cap. Factor |
|---------|--------|------------|-----------|-----------|-------------|
| 1       | 99.994 | 61321.8709 | 5.32 min  | 2383.3163 | 5324        |
| 2       | 0.006  | 3.6614     | 7.4 min   | 0.0662    | 7398.9667   |

## Chiral HPLC of Compound *ent-11*

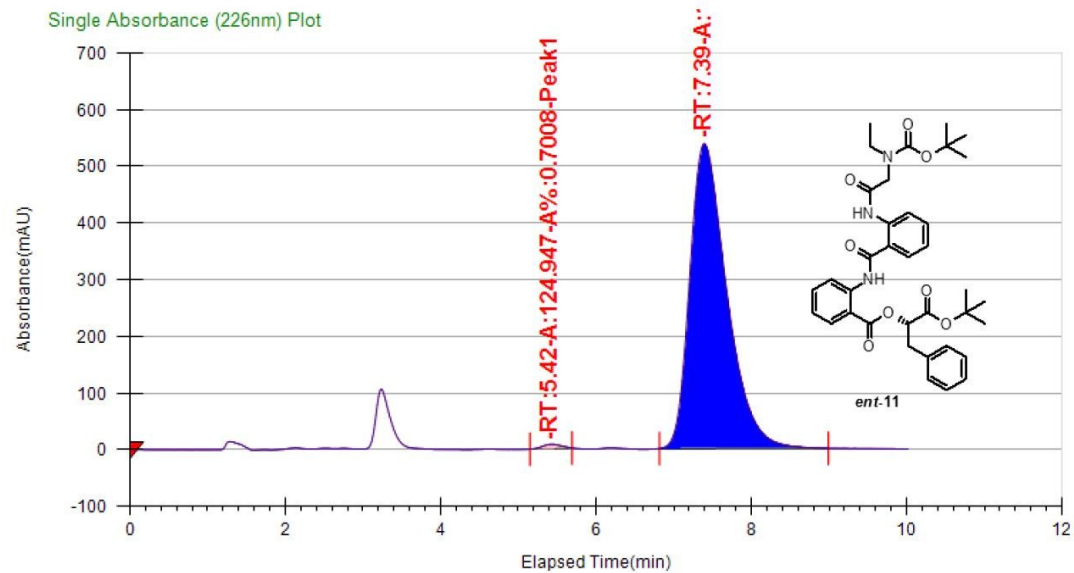

### General Information

| Log Author    | Log Date                | Report By     | Report Date | Notes |
|---------------|-------------------------|---------------|-------------|-------|
| Administrator | 5/16/2015<br>2:07:36 AM | Administrator | 5/16/2015   |       |

### Run Information

| Instrument Method | Inj. Vol. | Solvent                 | Column                            | Sample               | Well Location | Temp. | Flow  | % Modifier | Pressure |
|-------------------|-----------|-------------------------|-----------------------------------|----------------------|---------------|-------|-------|------------|----------|
| 3g-40%-100bar     | 10        | 0.5% DEA in<br>METHANOL | Chiralpak-IC<br>(4.6*250)<br>mm5u | GVKP-SK-<br>B1329-70 | 15B           | 29.9  | 2.999 | 40.0133    | 100      |

### Peak Information

| Peak No | % Area  | Area       | Ret. Time | Height  | Cap. Factor |
|---------|---------|------------|-----------|---------|-------------|
| 1       | 0.7008  | 124.947    | 5.42 min  | 7.655   | 0           |
| 2       | 99.2992 | 17705.3701 | 7.39 min  | 538.372 | 0           |

# <sup>1</sup>H NMR of Compound 12 in CDCl<sub>3</sub>

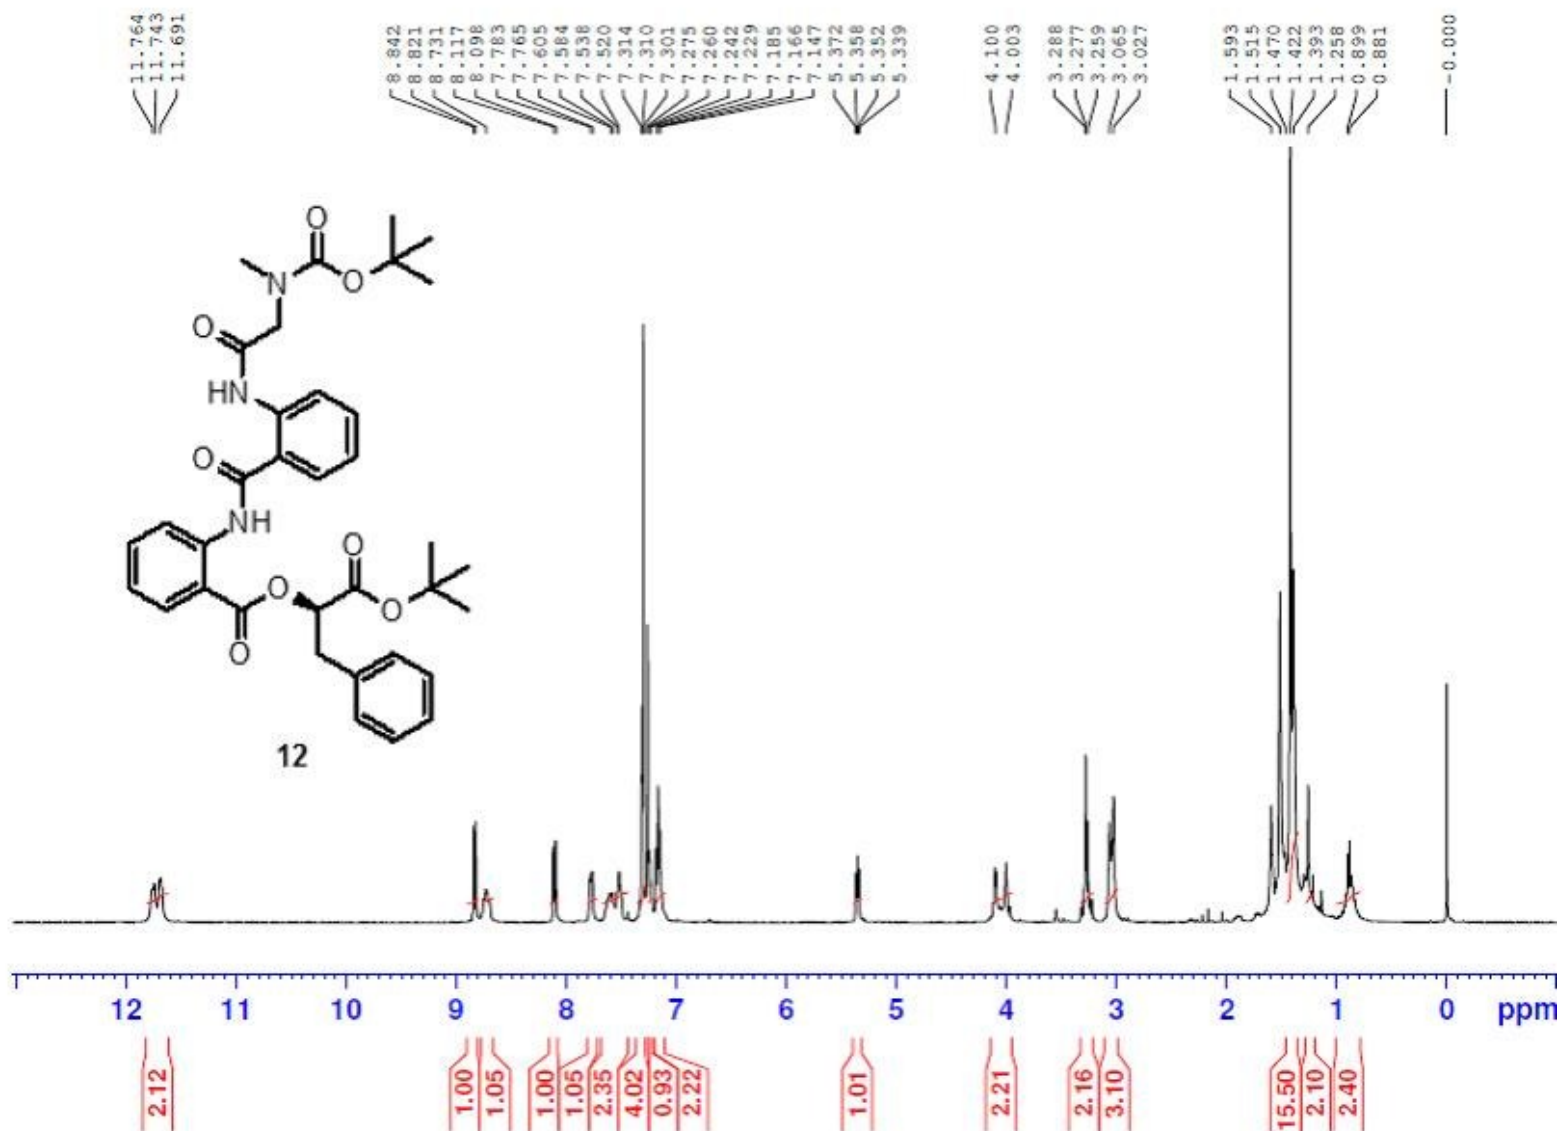

# VT $^1\text{H}$ NMR of Compound 12 in $\text{DMSO-d}_6$

GVKP-SK-B1329-84-R-VT AT 90C

Solvent: dms

400-MR/NRM-1/NMR-001

Date: Jun 4 2015

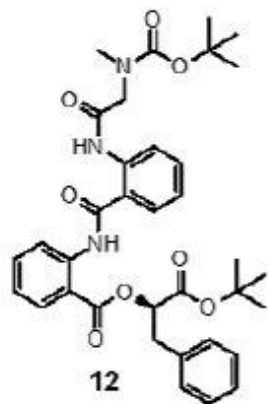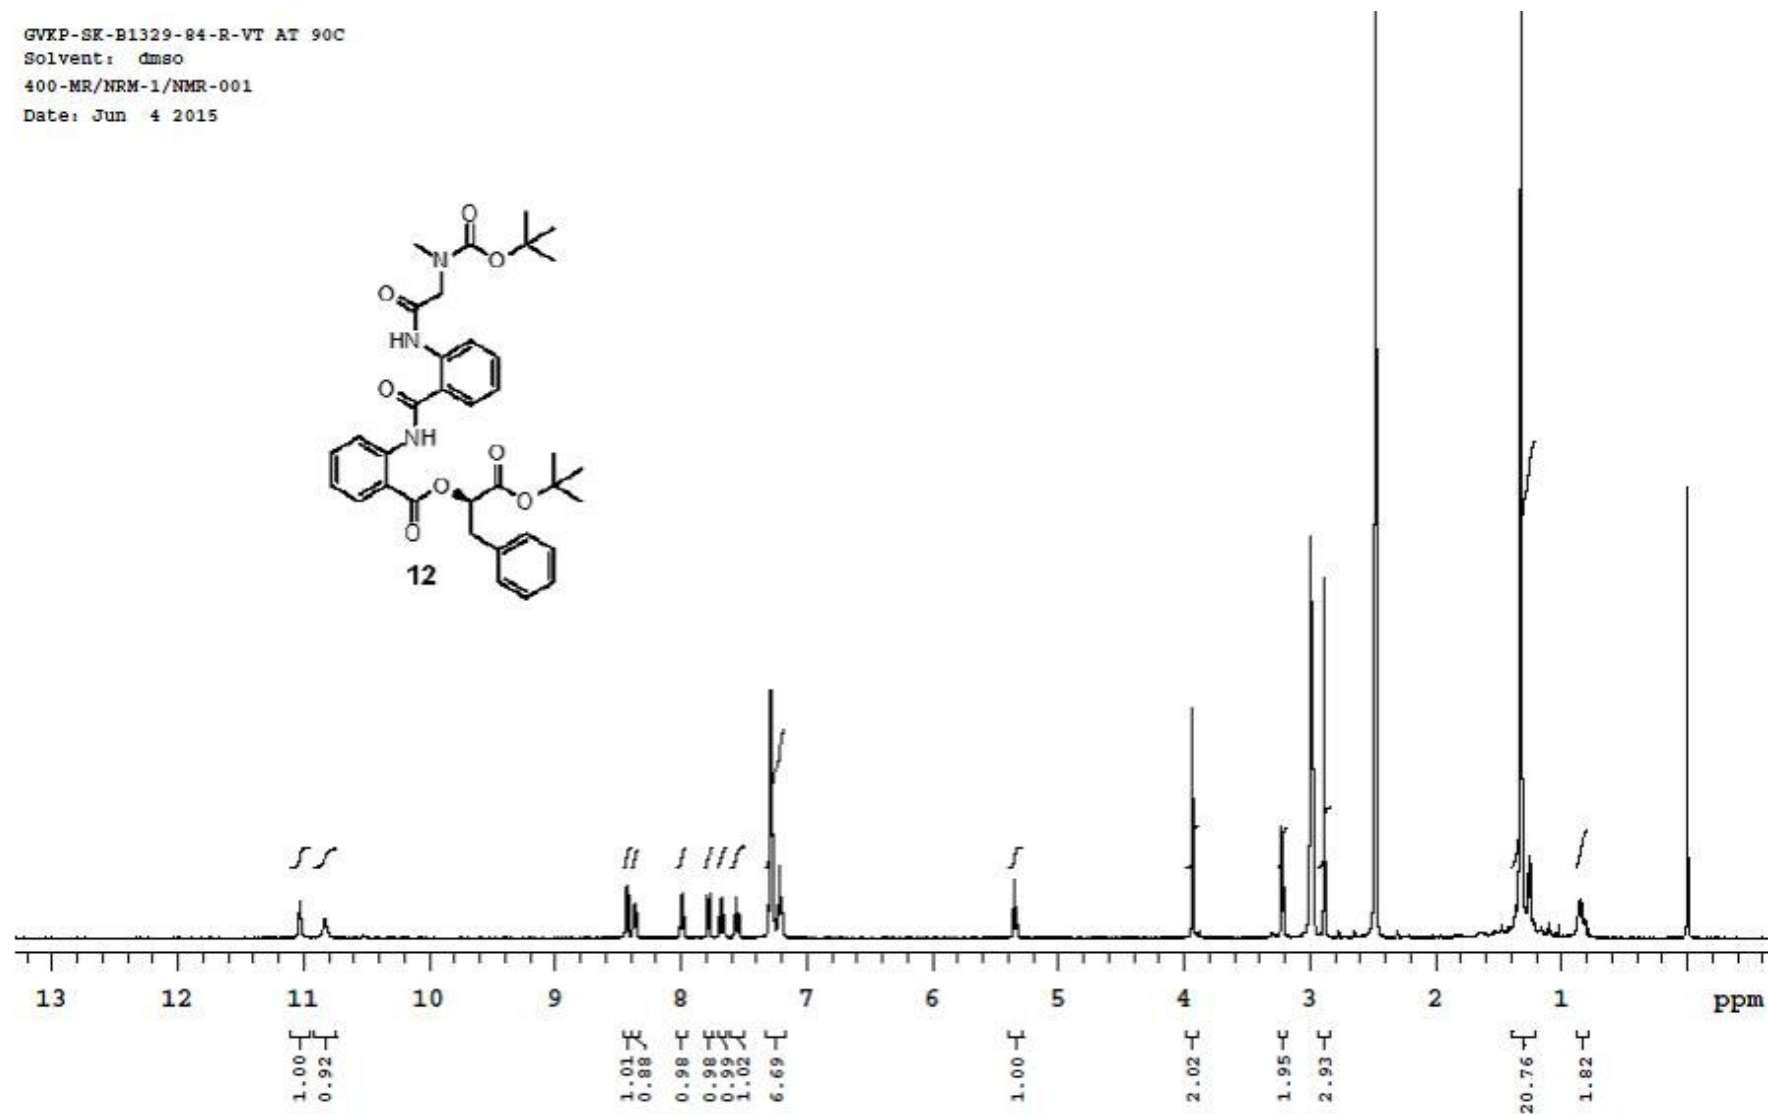

<sup>1</sup>H NMR of Compound *ent*-12 in CDCl<sub>3</sub>

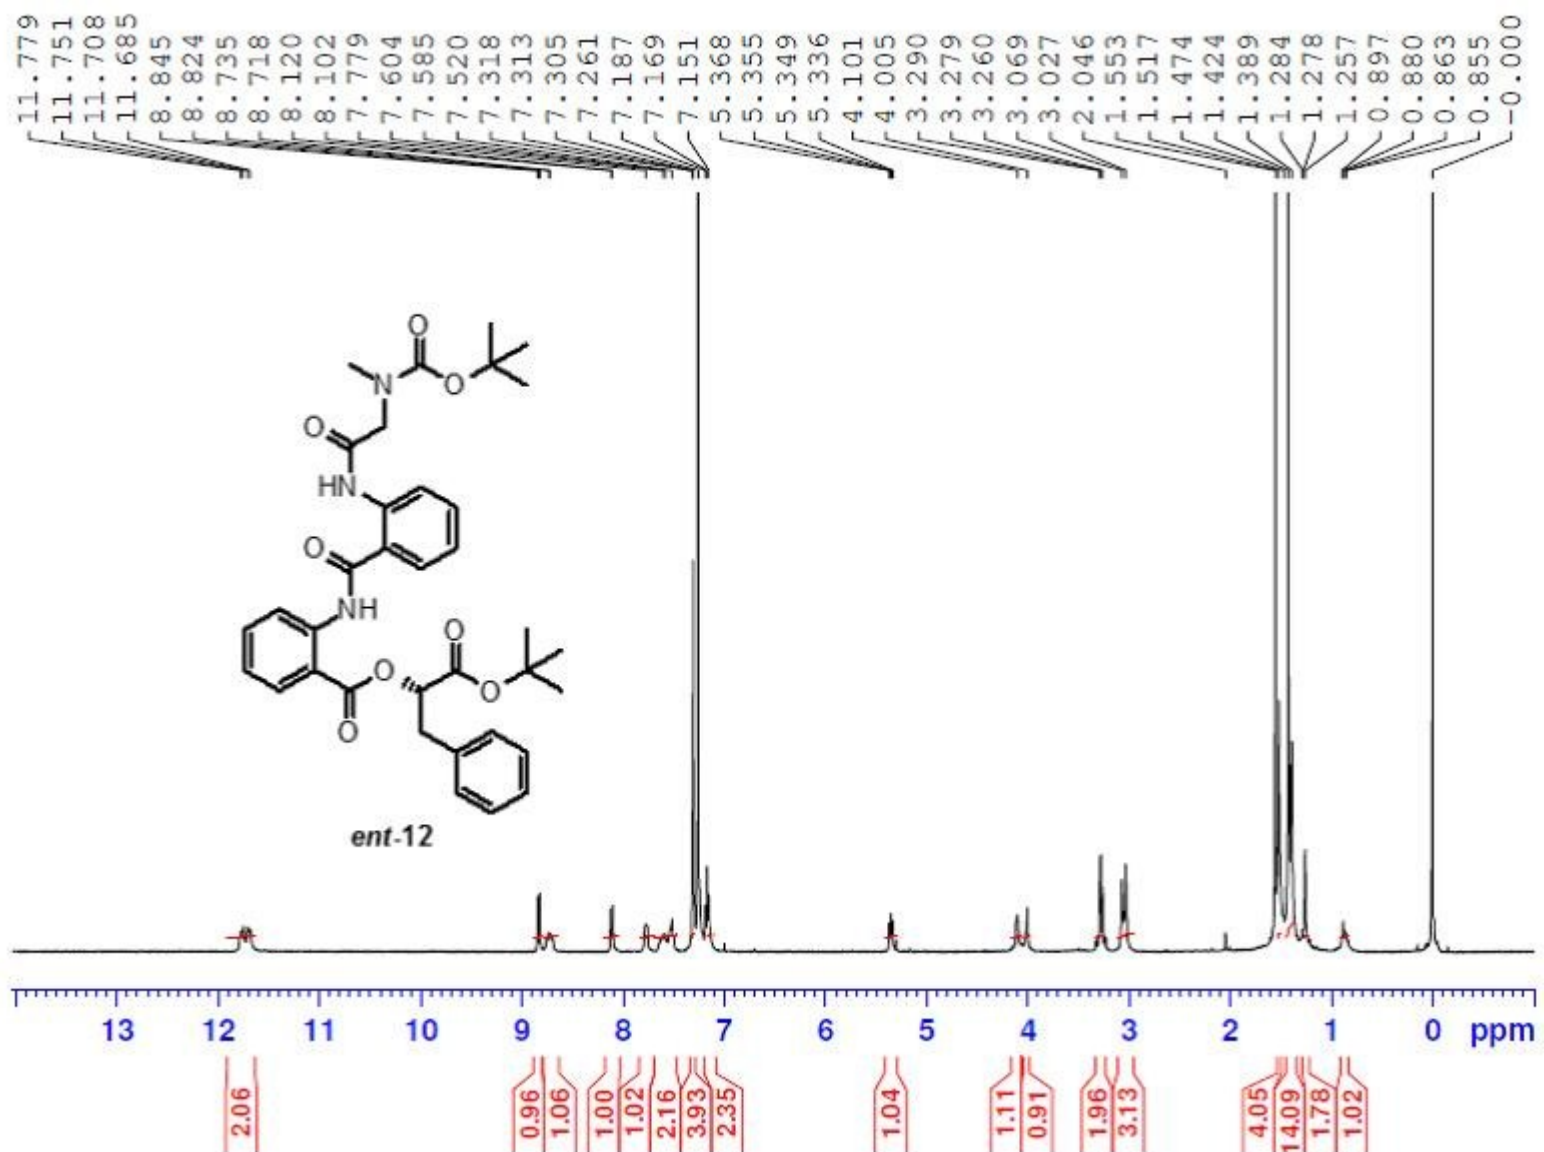



# VT $^1\text{H}$ NMR of Compound *ent*-12 in $\text{DMSO-d}_6$

GVKP-SK-B1329-67-S-VT

Solvent: dmsc

400-MR/NRM-1/NMR-001

Date: Jun 12 2015

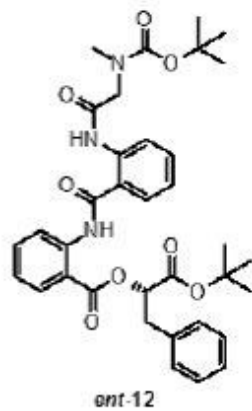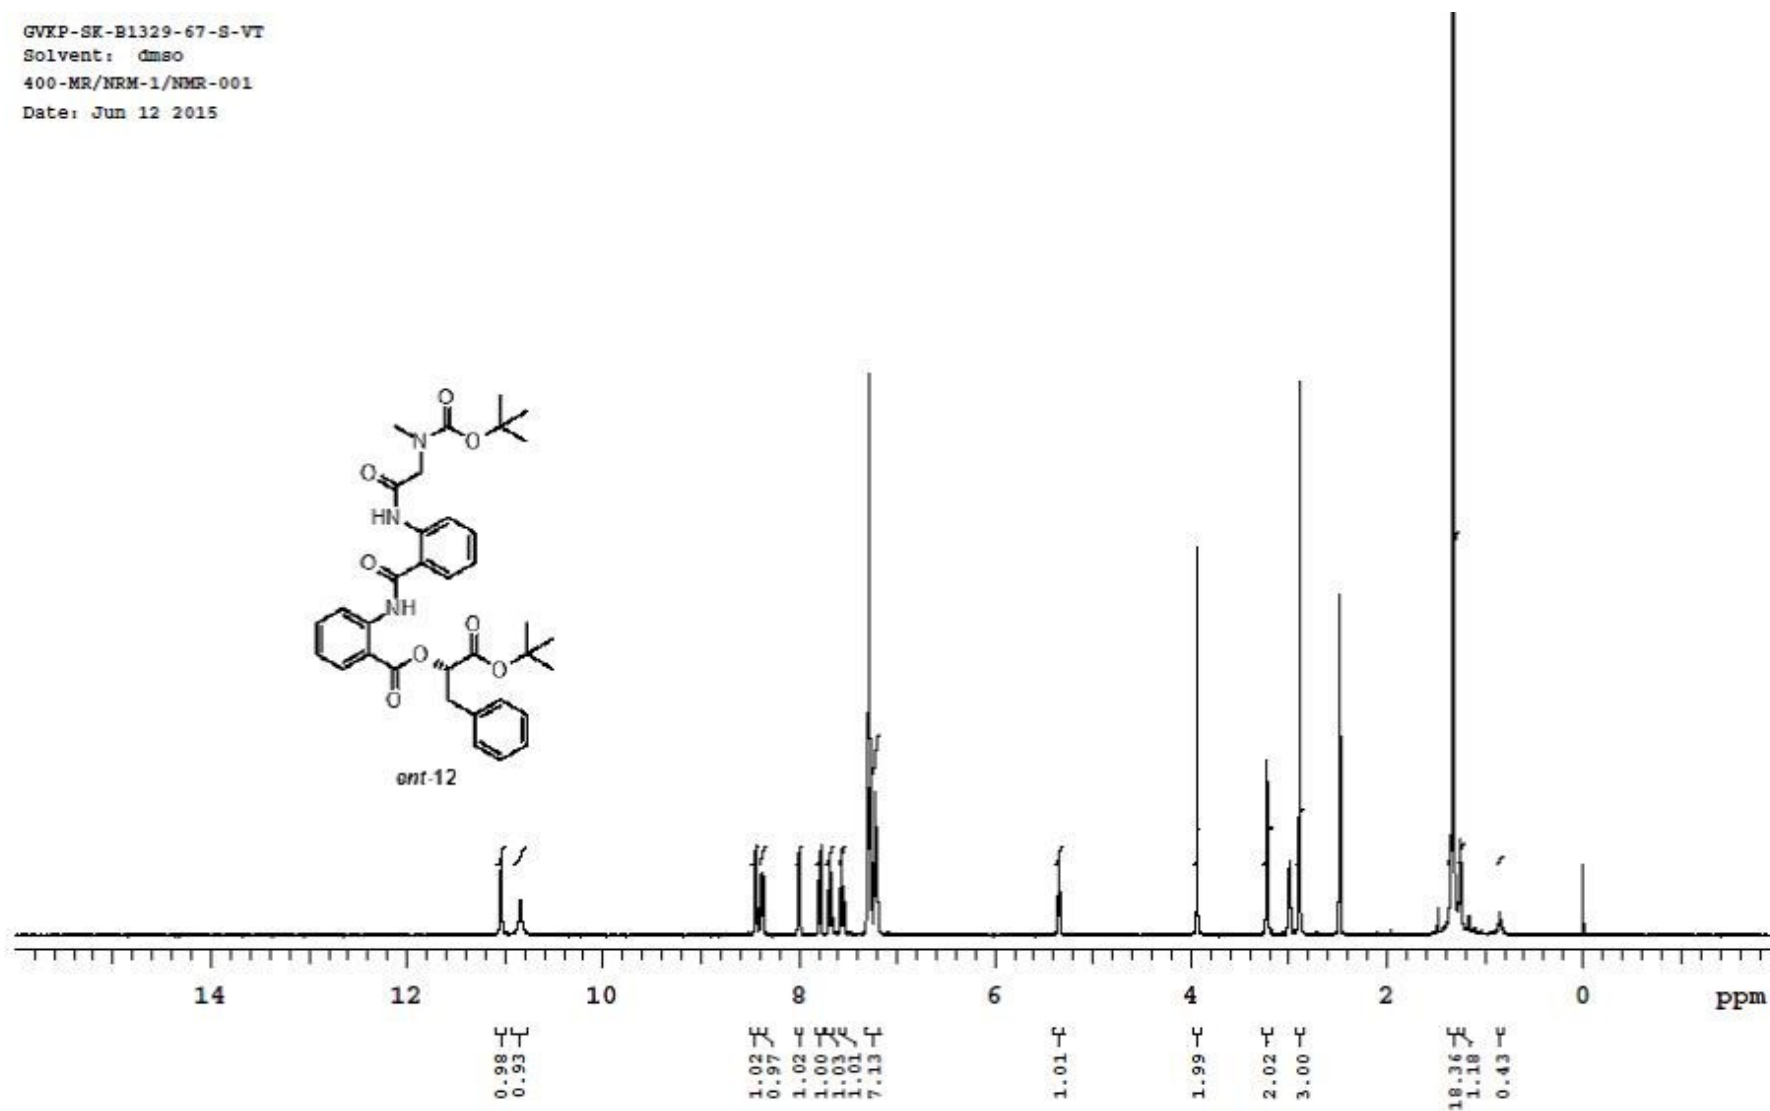



## Chiral HPLC of Compound 12

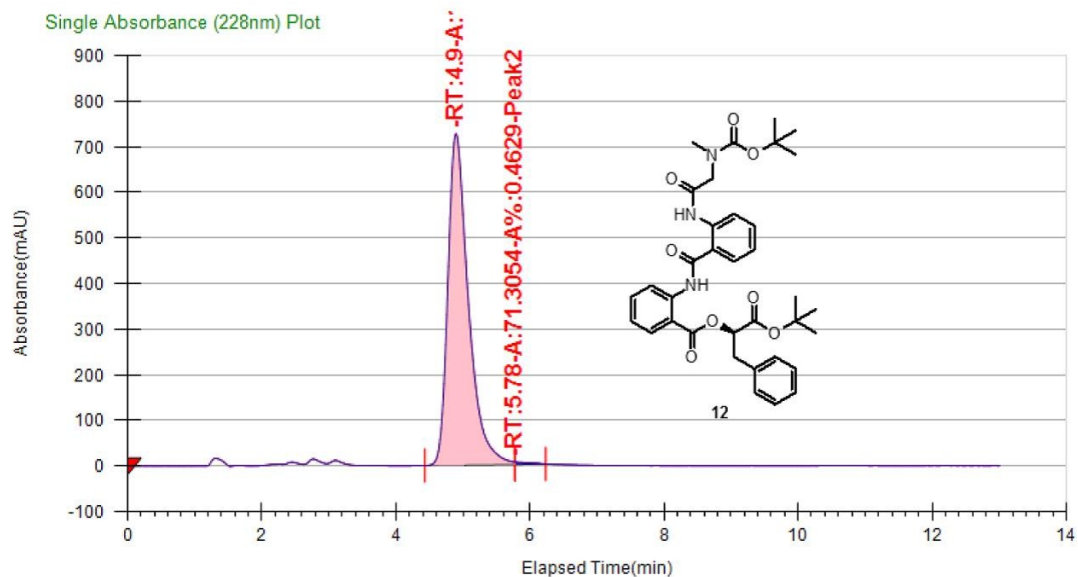

### General Information

| Log Author    | Log Date                | Report By     | Report Date | Notes |
|---------------|-------------------------|---------------|-------------|-------|
| Administrator | 5/16/2015<br>7:55:50 PM | Administrator | 5/18/2015   |       |

### Run Information

| Instrument Method | Inj. Vol. | Solvent                 | Column                            | Sample                | Well Location | Temp. | Flow | % Modifier | Pressure |
|-------------------|-----------|-------------------------|-----------------------------------|-----------------------|---------------|-------|------|------------|----------|
| 3g-45%-100bar     | 10        | 0.5% DEA in<br>METHANOL | Chiralpak-IC<br>(4.6*250)<br>mm5u | GVKP-SK-<br>B1329-84C | 21B           | 29.9  | 3    | 45         | 100      |

### Peak Information

| Peak No | % Area  | Area      | Ret. Time | Height   | Cap. Factor |
|---------|---------|-----------|-----------|----------|-------------|
| 1       | 99.5371 | 15333.051 | 4.9 min   | 726.7838 | 4899.0167   |
| 2       | 0.4629  | 71.3054   | 5.78 min  | 5.1824   | 5782.3333   |

## Chiral HPLC of Compound *ent*-12

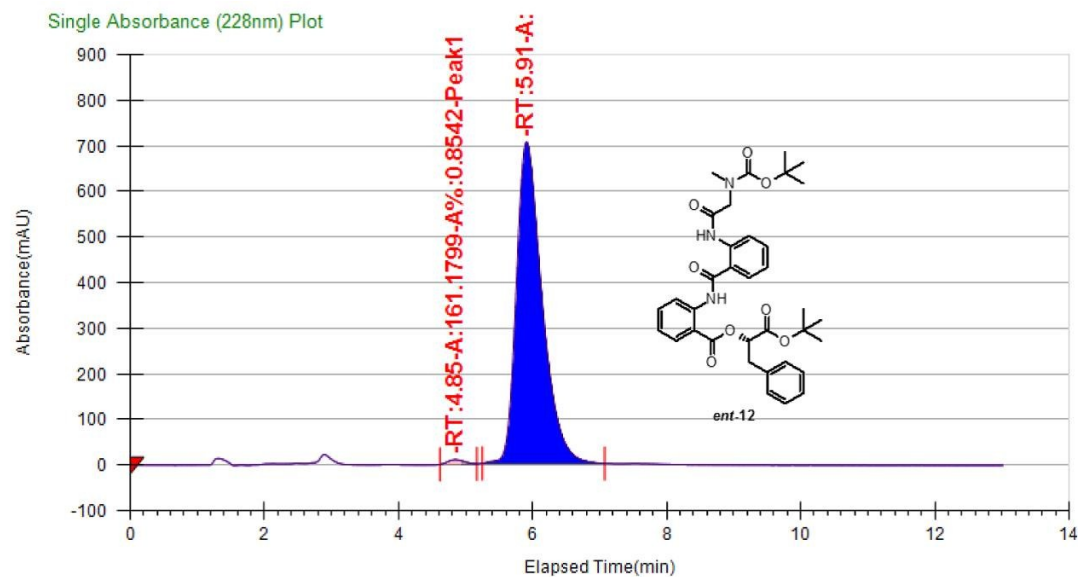

### General Information

| Log Author    | Log Date                | Report By     | Report Date | Notes |
|---------------|-------------------------|---------------|-------------|-------|
| Administrator | 5/16/2015<br>8:24:24 PM | Administrator | 5/18/2015   |       |

### Run Information

| Instrument Method | Inj. Vol. | Solvent                 | Column                            | Sample               | Well Location | Temp. | Flow | % Modifier | Pressure |
|-------------------|-----------|-------------------------|-----------------------------------|----------------------|---------------|-------|------|------------|----------|
| 3g-45%-100bar     | 10        | 0.5% DEA in<br>METHANOL | Chiralpak-IC<br>(4.6*250)<br>mm5u | GVKP-SK-<br>B1329-66 | 22B           | 30.1  | 3    | 45         | 100      |

### Peak Information

| Peak No | % Area  | Area       | Ret. Time | Height   | Cap. Factor |
|---------|---------|------------|-----------|----------|-------------|
| 1       | 0.8542  | 161.1799   | 4.85 min  | 9.795    | 4849.0167   |
| 2       | 99.1458 | 18707.4694 | 5.91 min  | 705.2798 | 5907.3333   |

<sup>1</sup>H NMR of Clavatustide A (1) in CDCl<sub>3</sub>

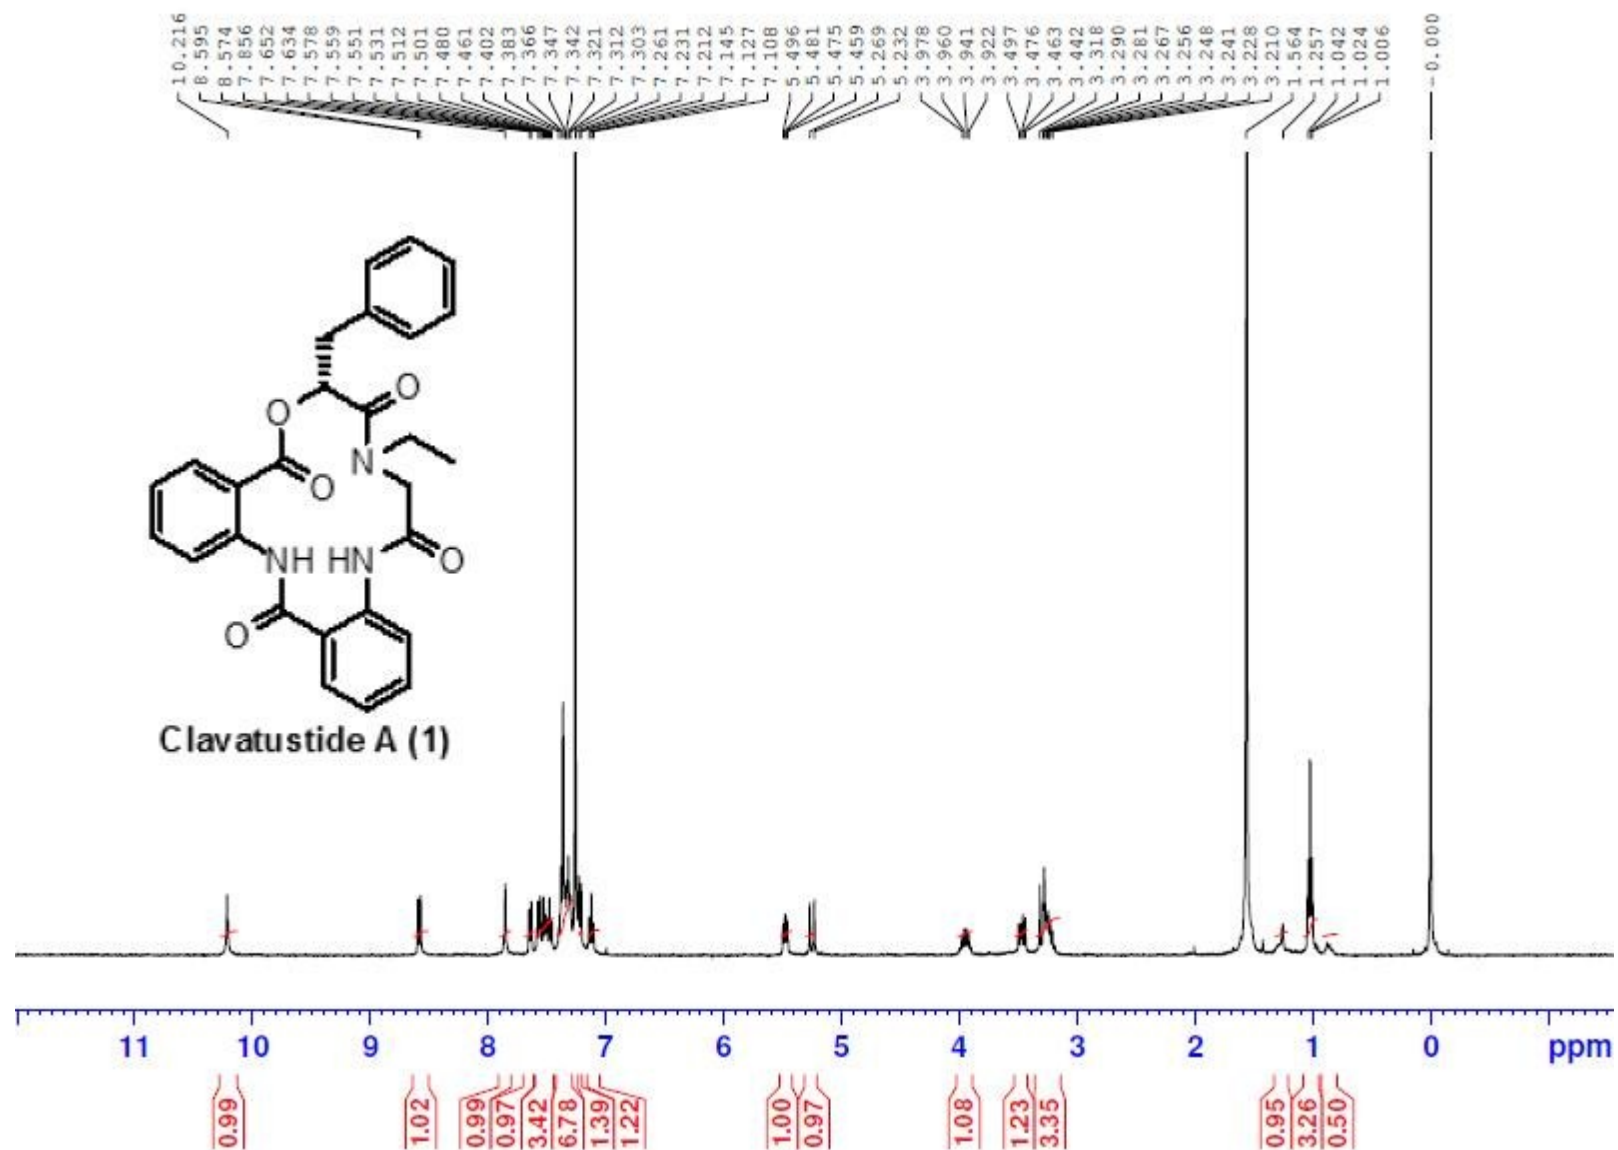

D<sub>2</sub>O exchange <sup>1</sup>H NMR of Clavatustide A (1) in CDCl<sub>3</sub>

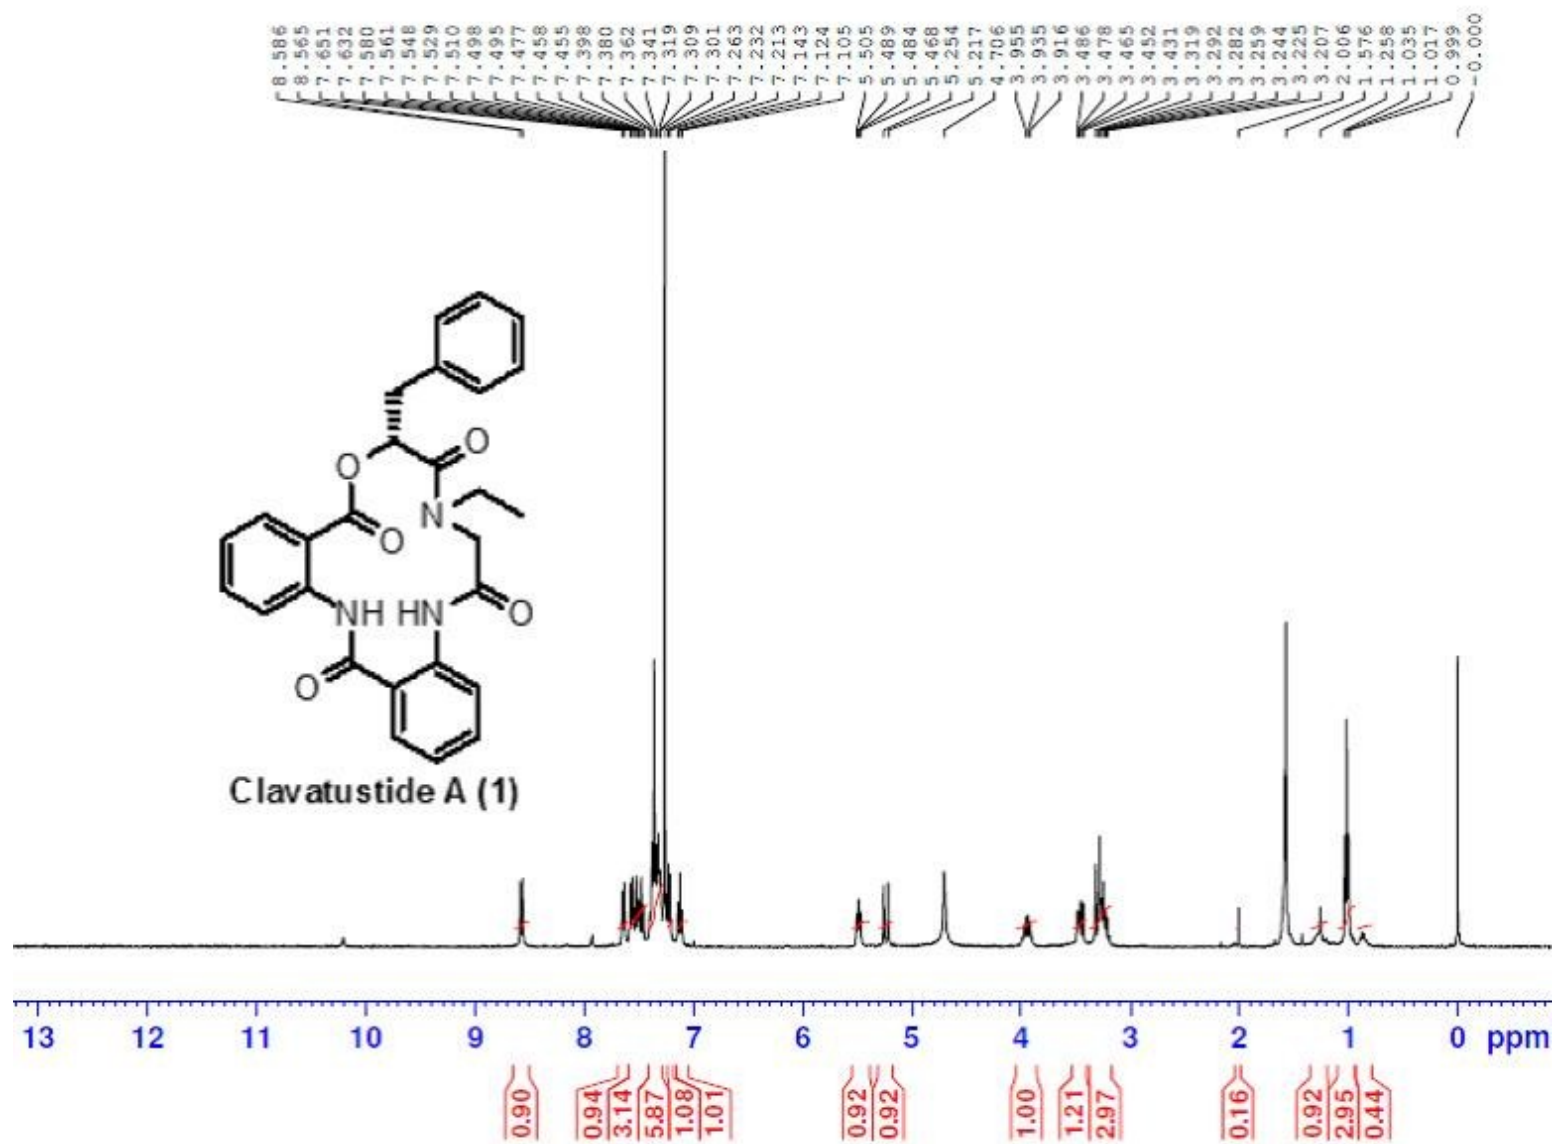

<sup>13</sup>C NMR of Clavatustide A (1) in CDCl<sub>3</sub>

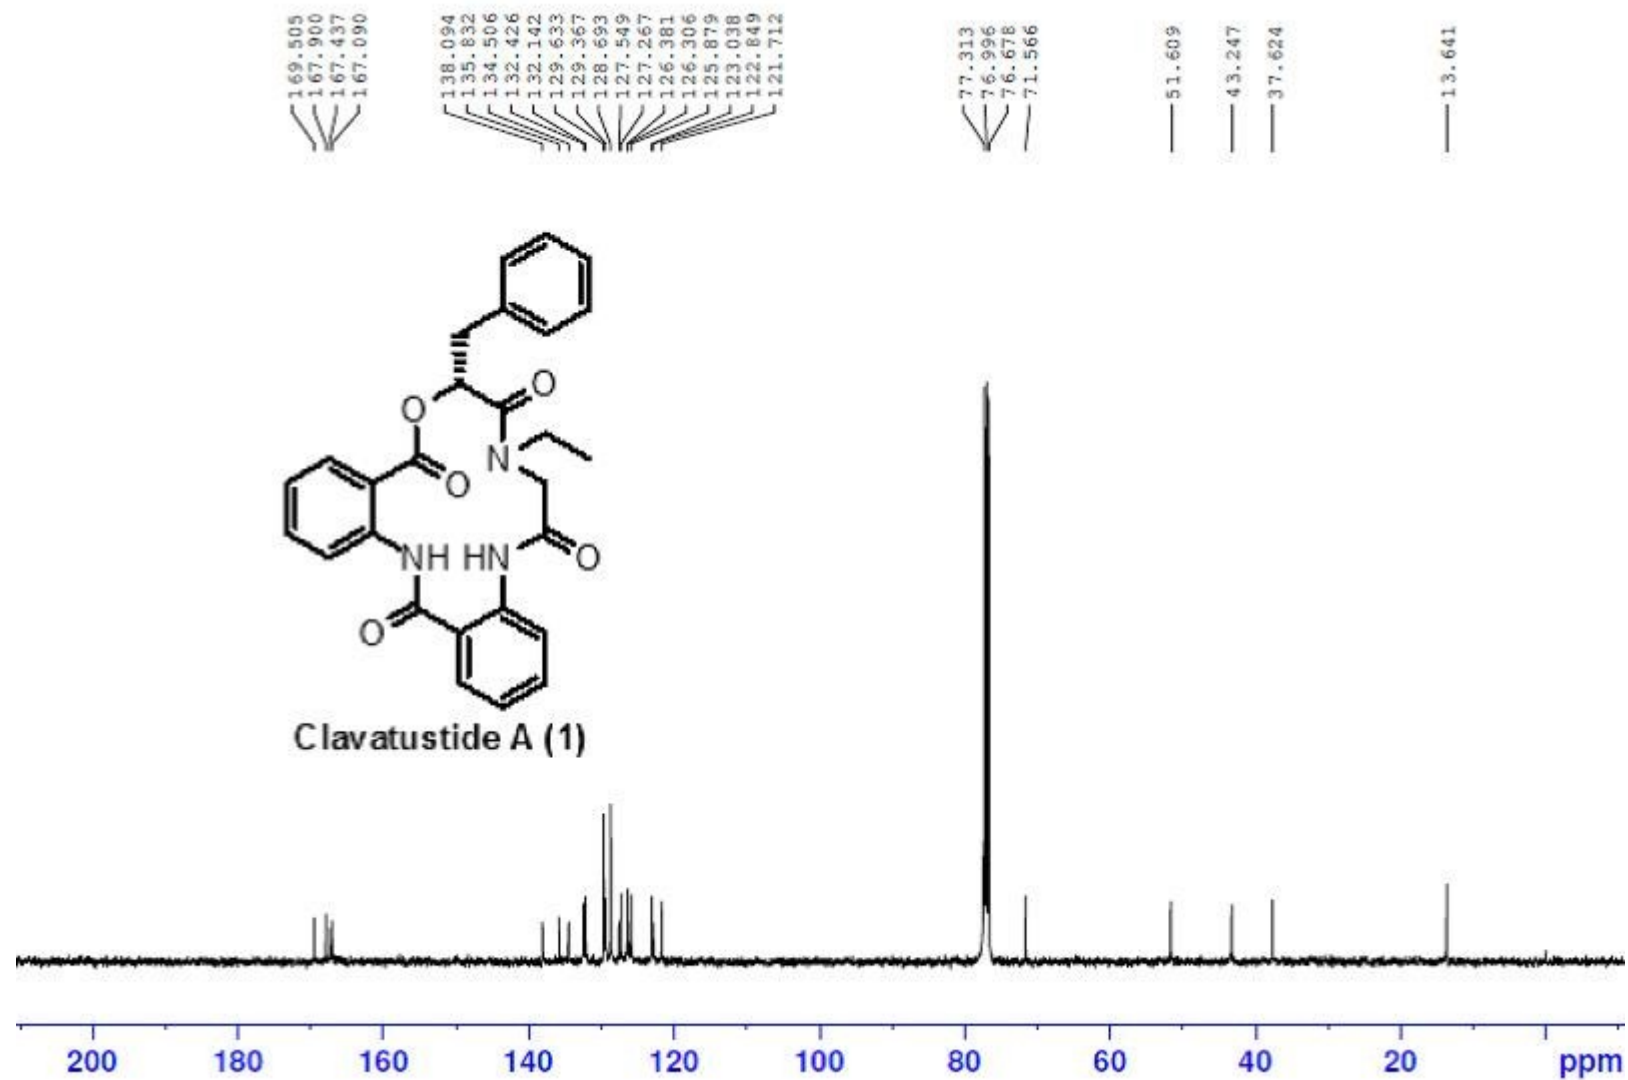

DEPT NMR of Clavatustide A (1) in CDCl<sub>3</sub>

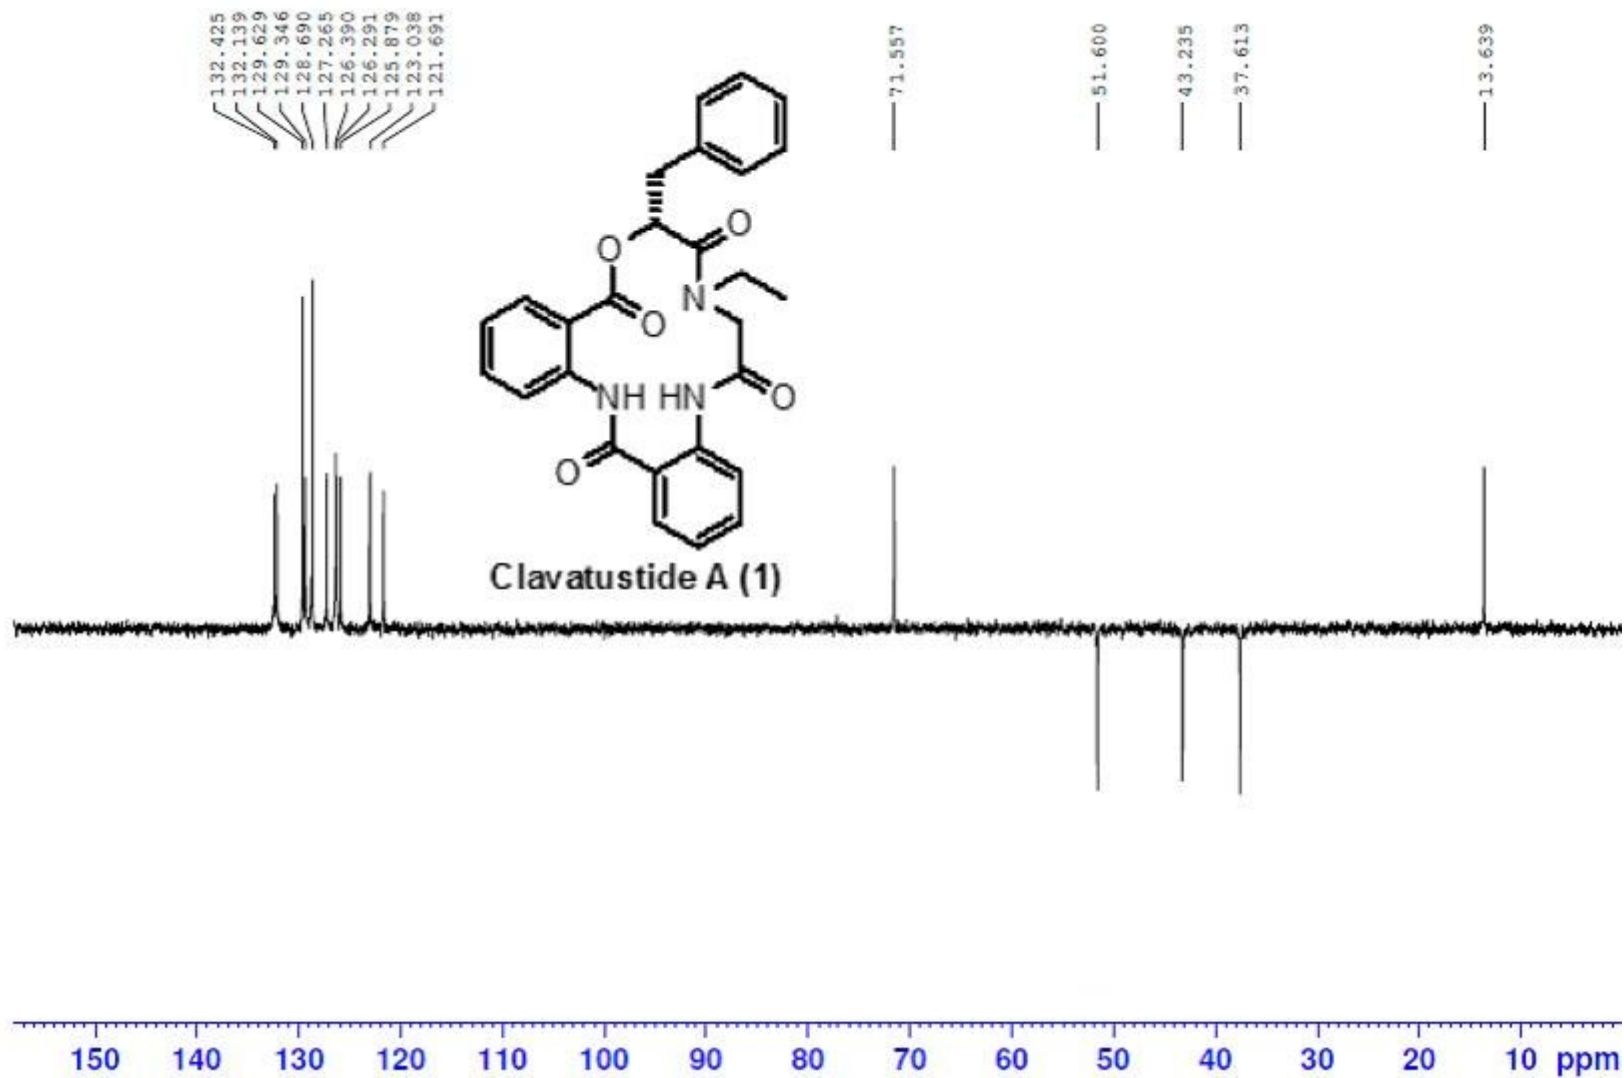



COSY NMR of Clavatustide A (1) in CDCl<sub>3</sub>

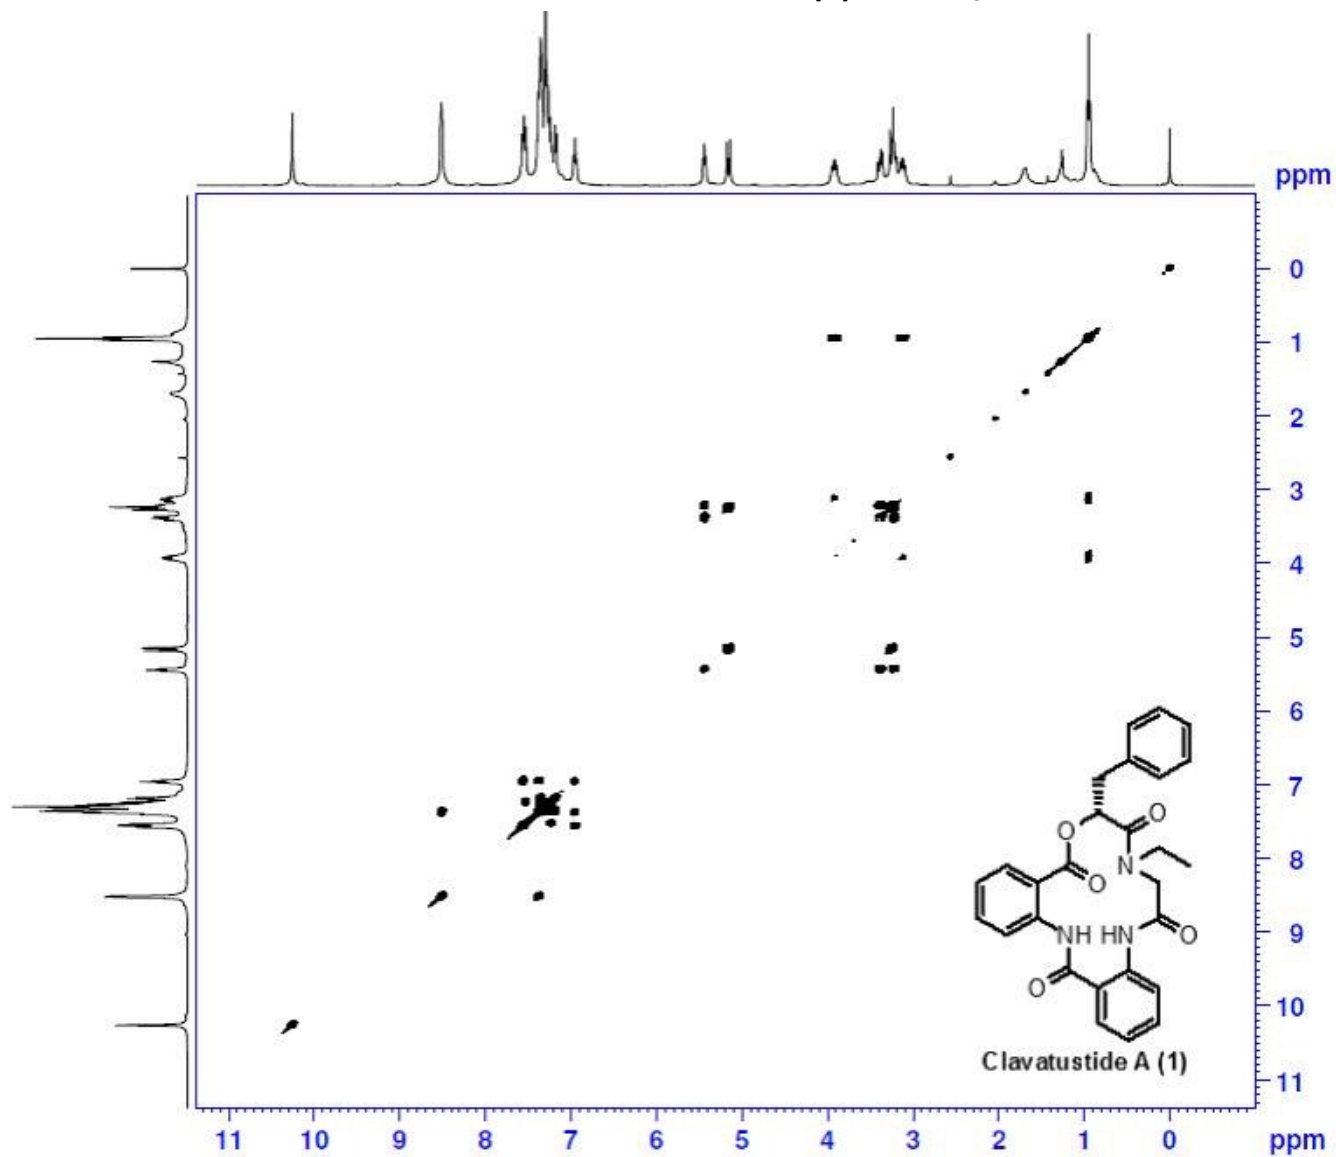

### HMBC NMR of Clavatustide A (1) in CDCl<sub>3</sub>

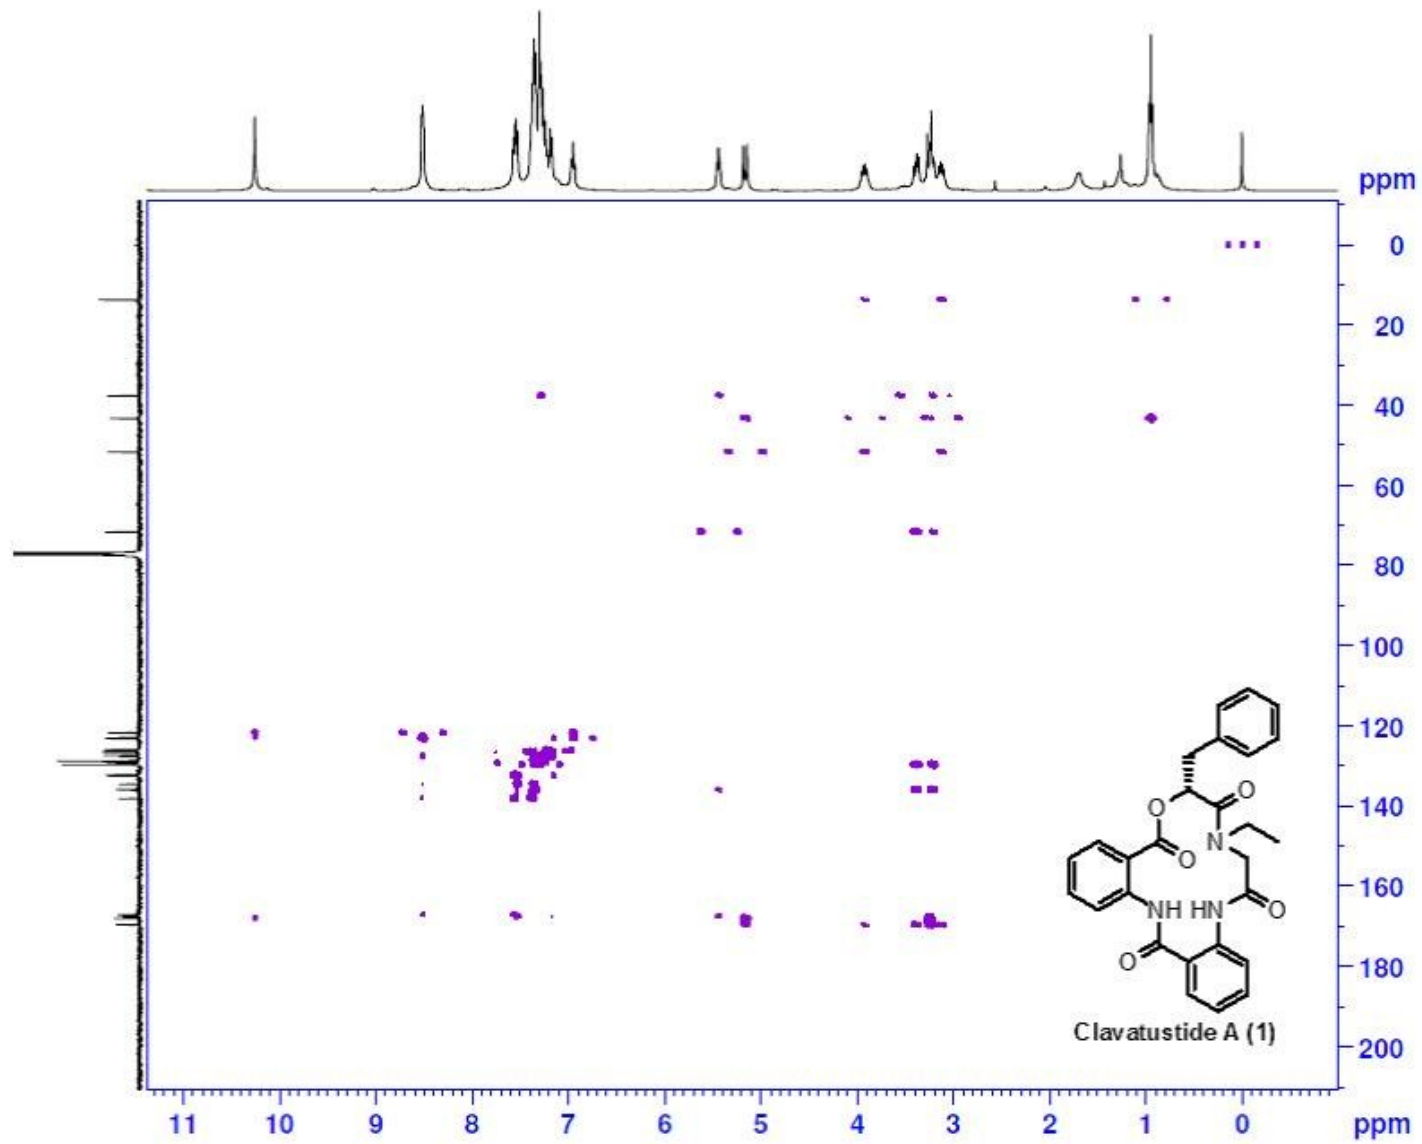

### HSQC of Clavatustide A (1) in CDCl<sub>3</sub>

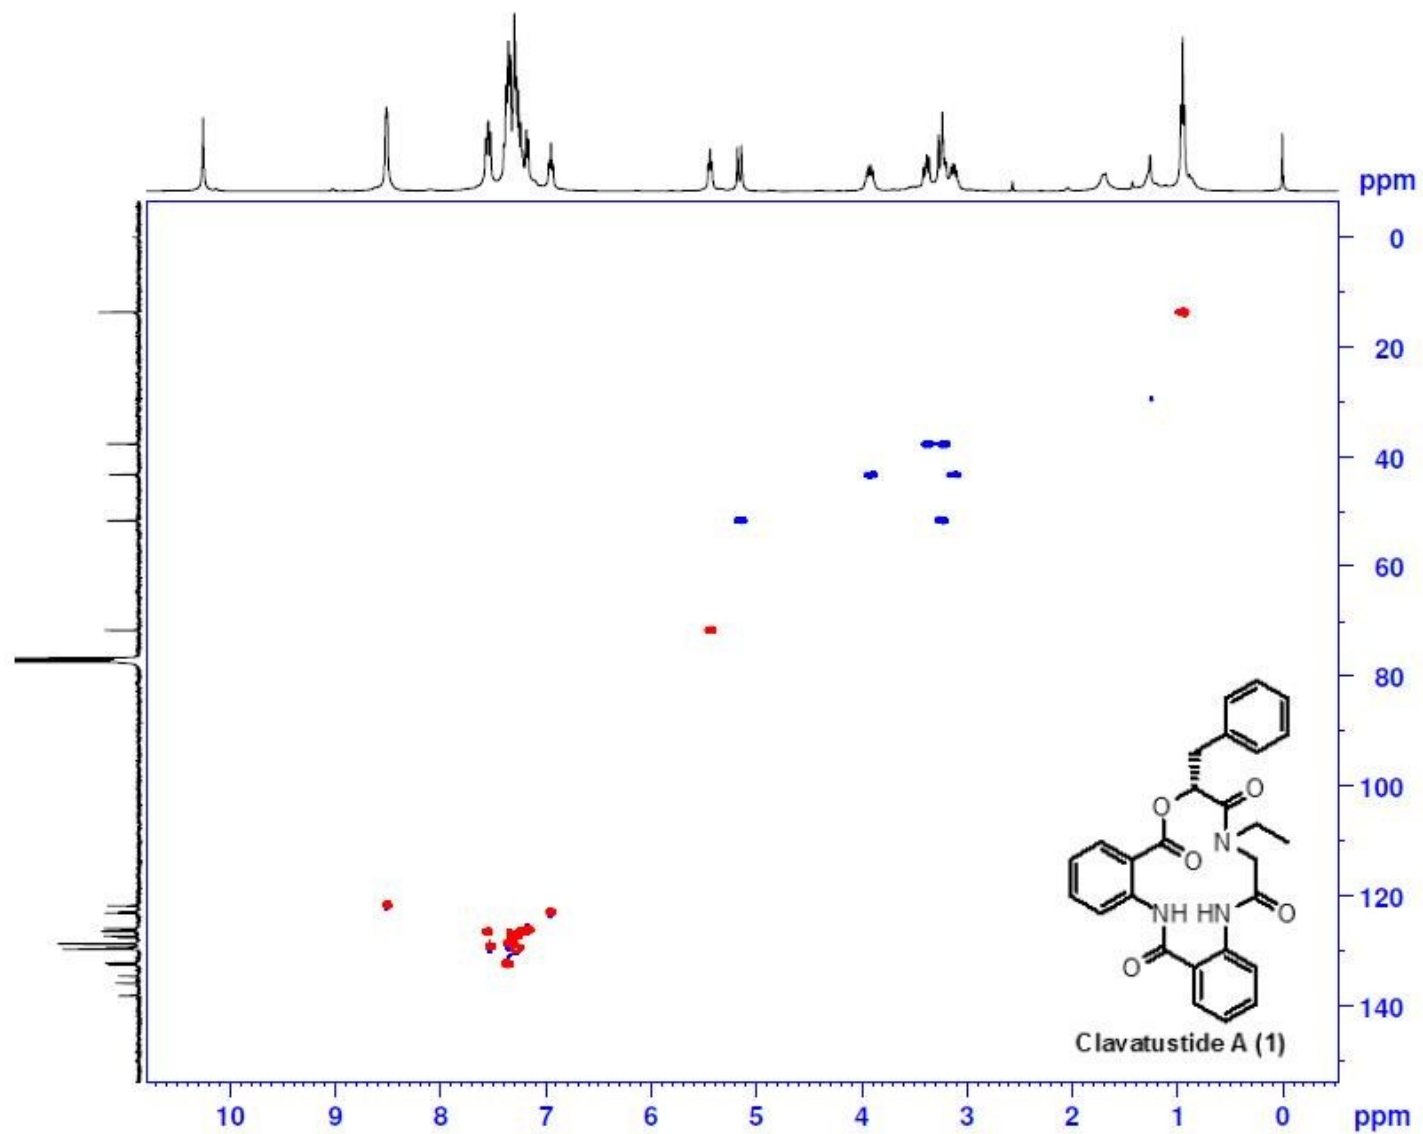

## HRMS of Clavatuside A (1)

### Elemental Composition Report

Page 1

### Single Mass Analysis

Tolerance = 1000.0 PPM / DBE: min = -1.5, max = 50.0

Element prediction: Off

Number of isotope peaks used for i-FIT = 3

Monoisotopic Mass, Even Electron Ions

19 formula(e) evaluated with 1 results within limits (up to 1 best isotopic matches for each mass)

Elements Used:

C: 0-27 H: 0-26 N: 0-3 O: 0-5

GVKP-SK-B1329-92-R-1

13082015-017-GVKP-SK-B1329-92-R-1 9 (0.275) AM (Top,4, Ht,5000.0,195.05,1.00,LS 10); Sm (Mn, 2x1.00); Sb (1,40.00); Cm (6:10)

2: TOF MS ES+  
7.07e+001

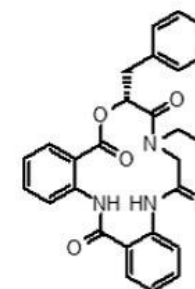

Clavatuside A (1)

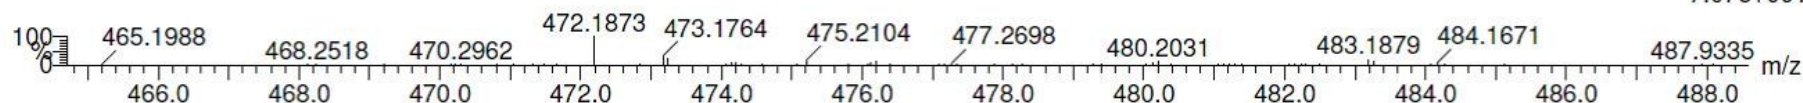

Minimum: -1.5  
Maximum: 5.0 1000.0 50.0

| Mass     | Calc. Mass | mDa | PPM | DBE  | i-FIT | Norm | Conf (%) | Formula       |
|----------|------------|-----|-----|------|-------|------|----------|---------------|
| 472.1873 | 472.1872   | 0.1 | 0.2 | 16.5 | 21.3  | n/a  | n/a      | C27 H26 N3 O5 |

<sup>1</sup>H NMR of Clavatuside A enantiomer (2) in CDCl<sub>3</sub>

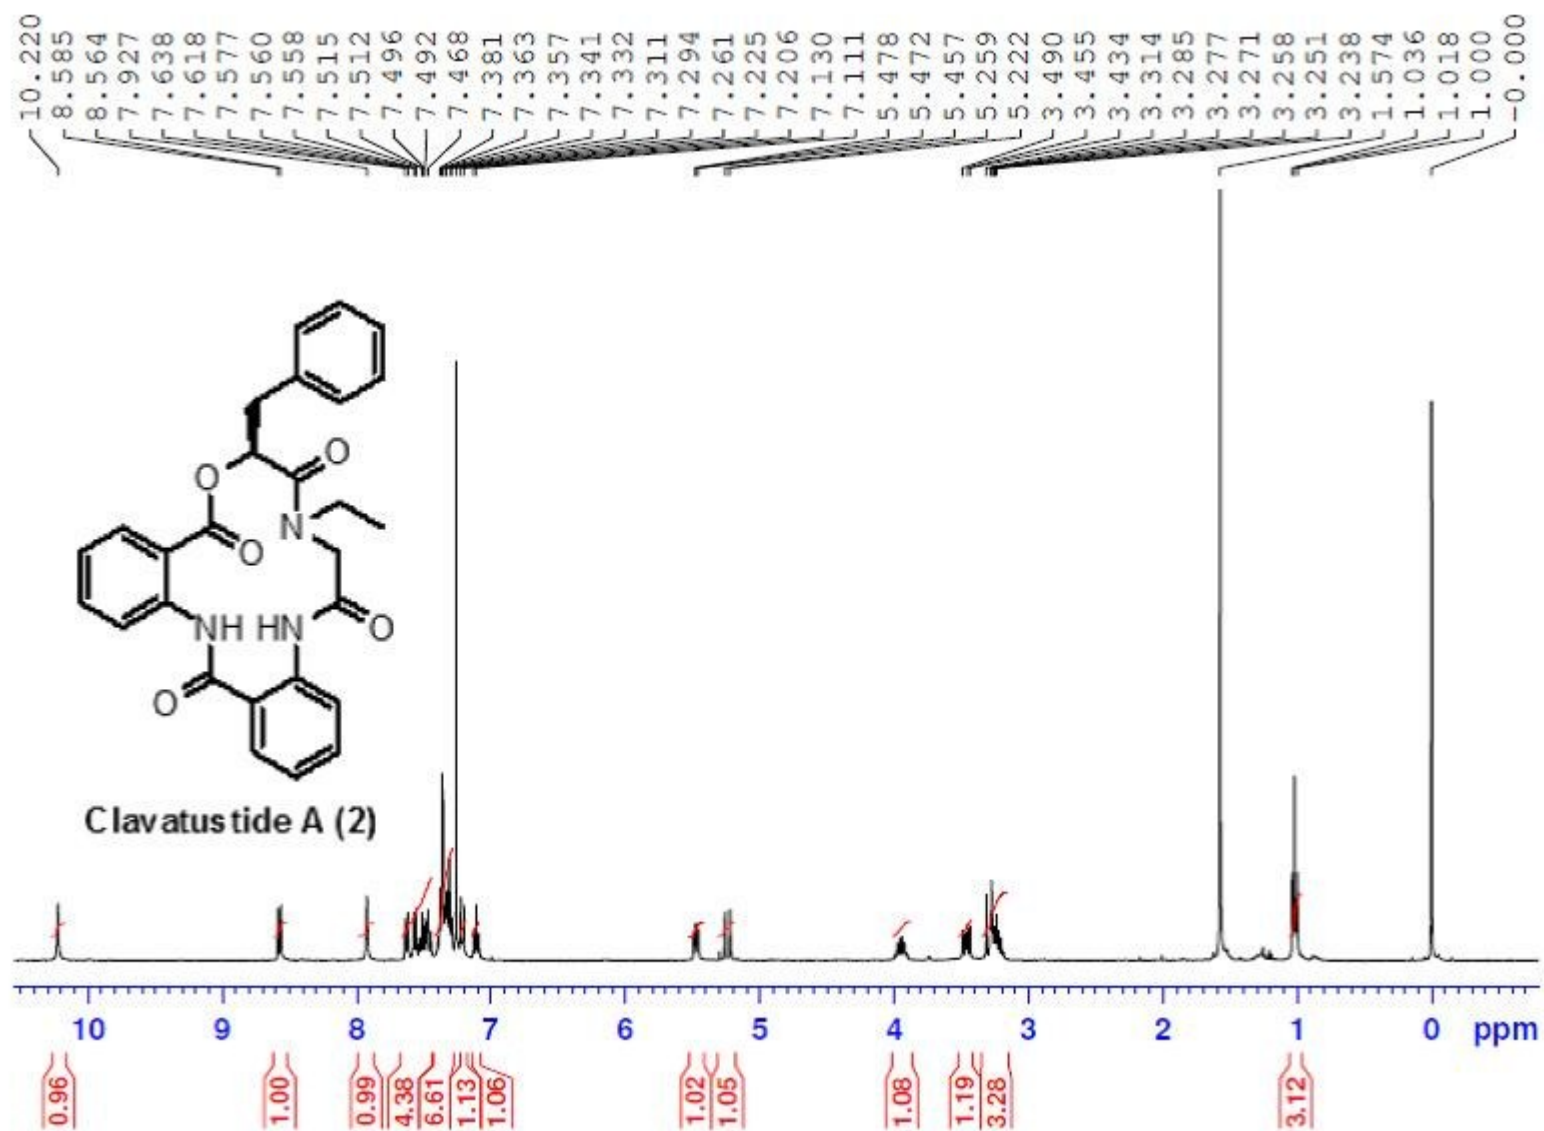

D<sub>2</sub>O exchange <sup>1</sup>H NMR of Clavatustide A enantiomer (2) in CDCl<sub>3</sub>

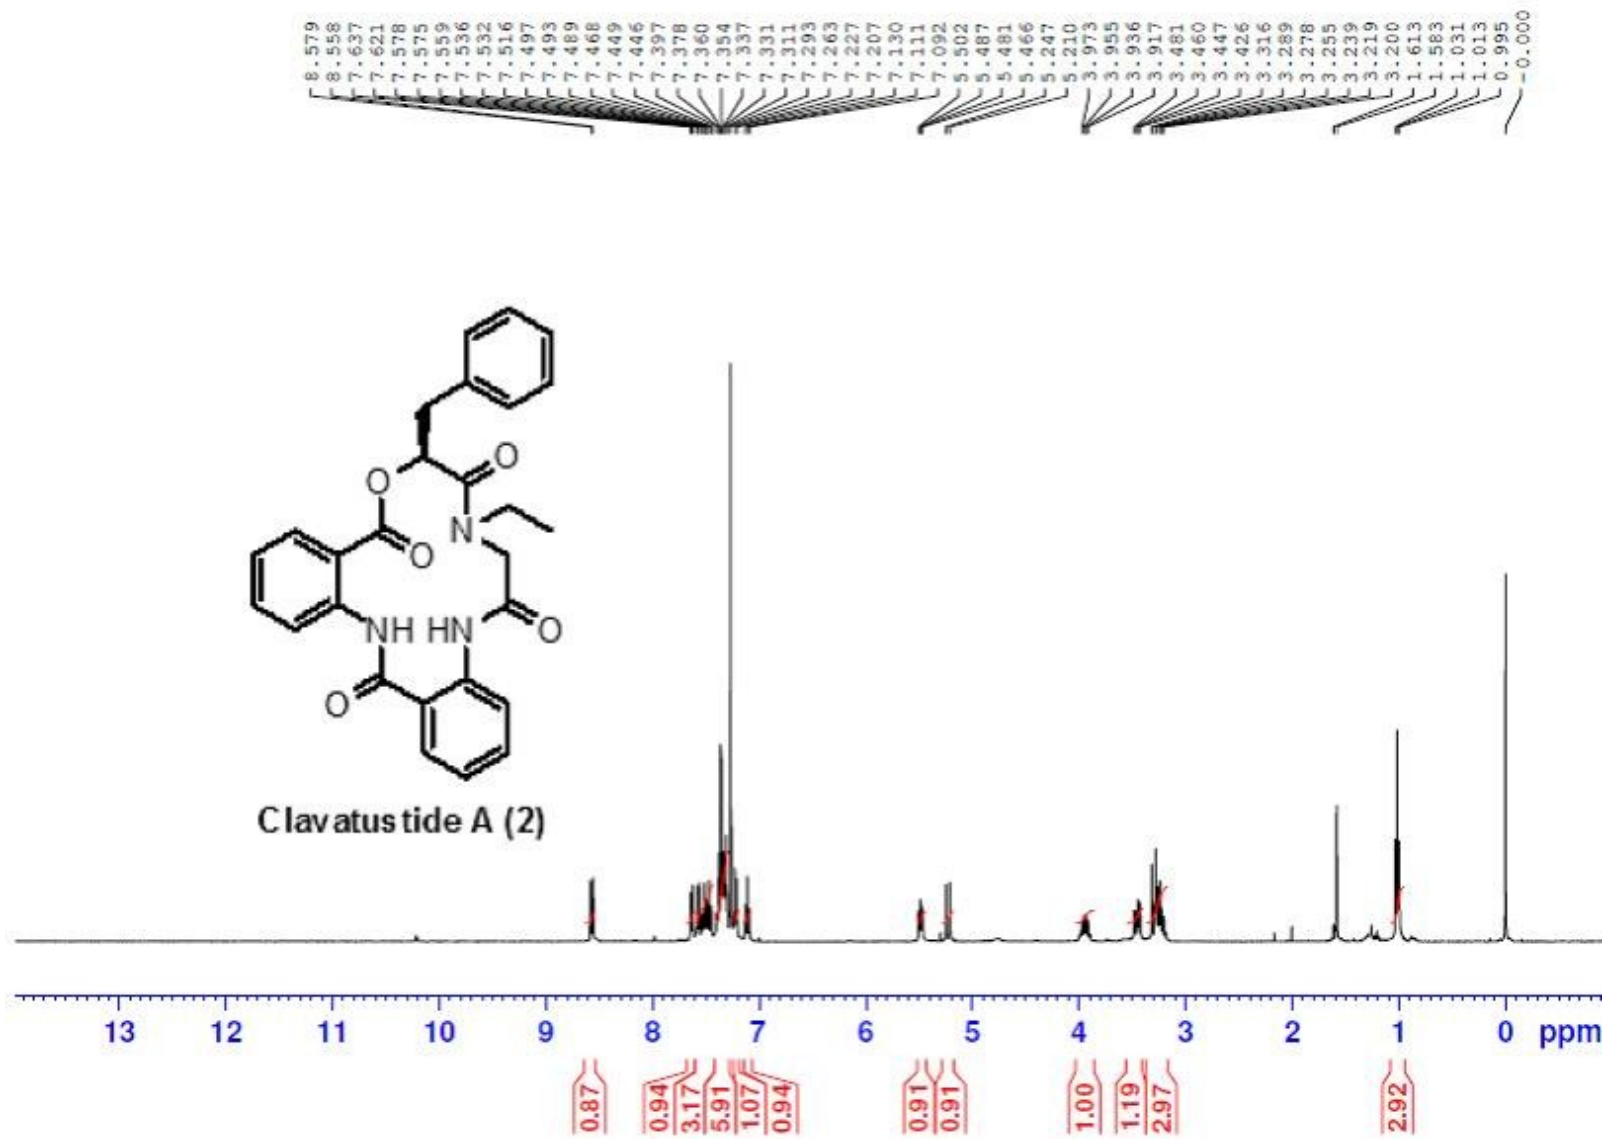

<sup>13</sup>C NMR of Clavatuside A enantiomer (2) in CDCl<sub>3</sub>

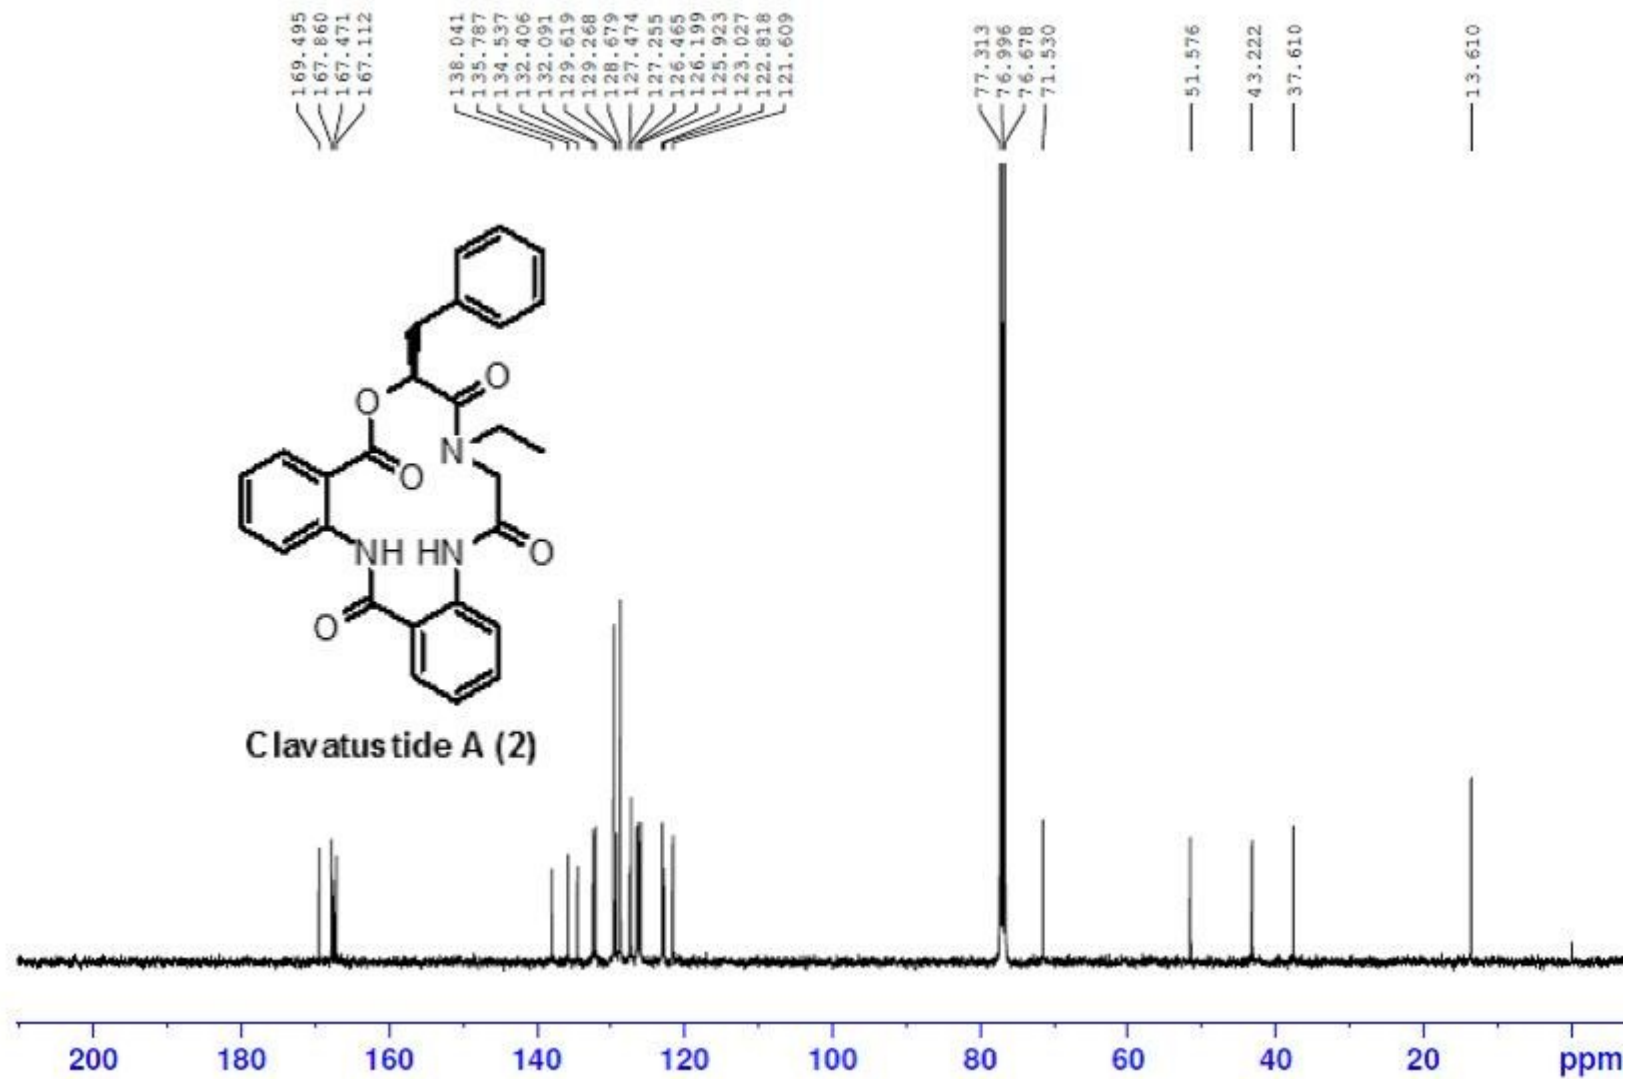

### DEPT NMR of Clavatuside A enantiomer (2) in

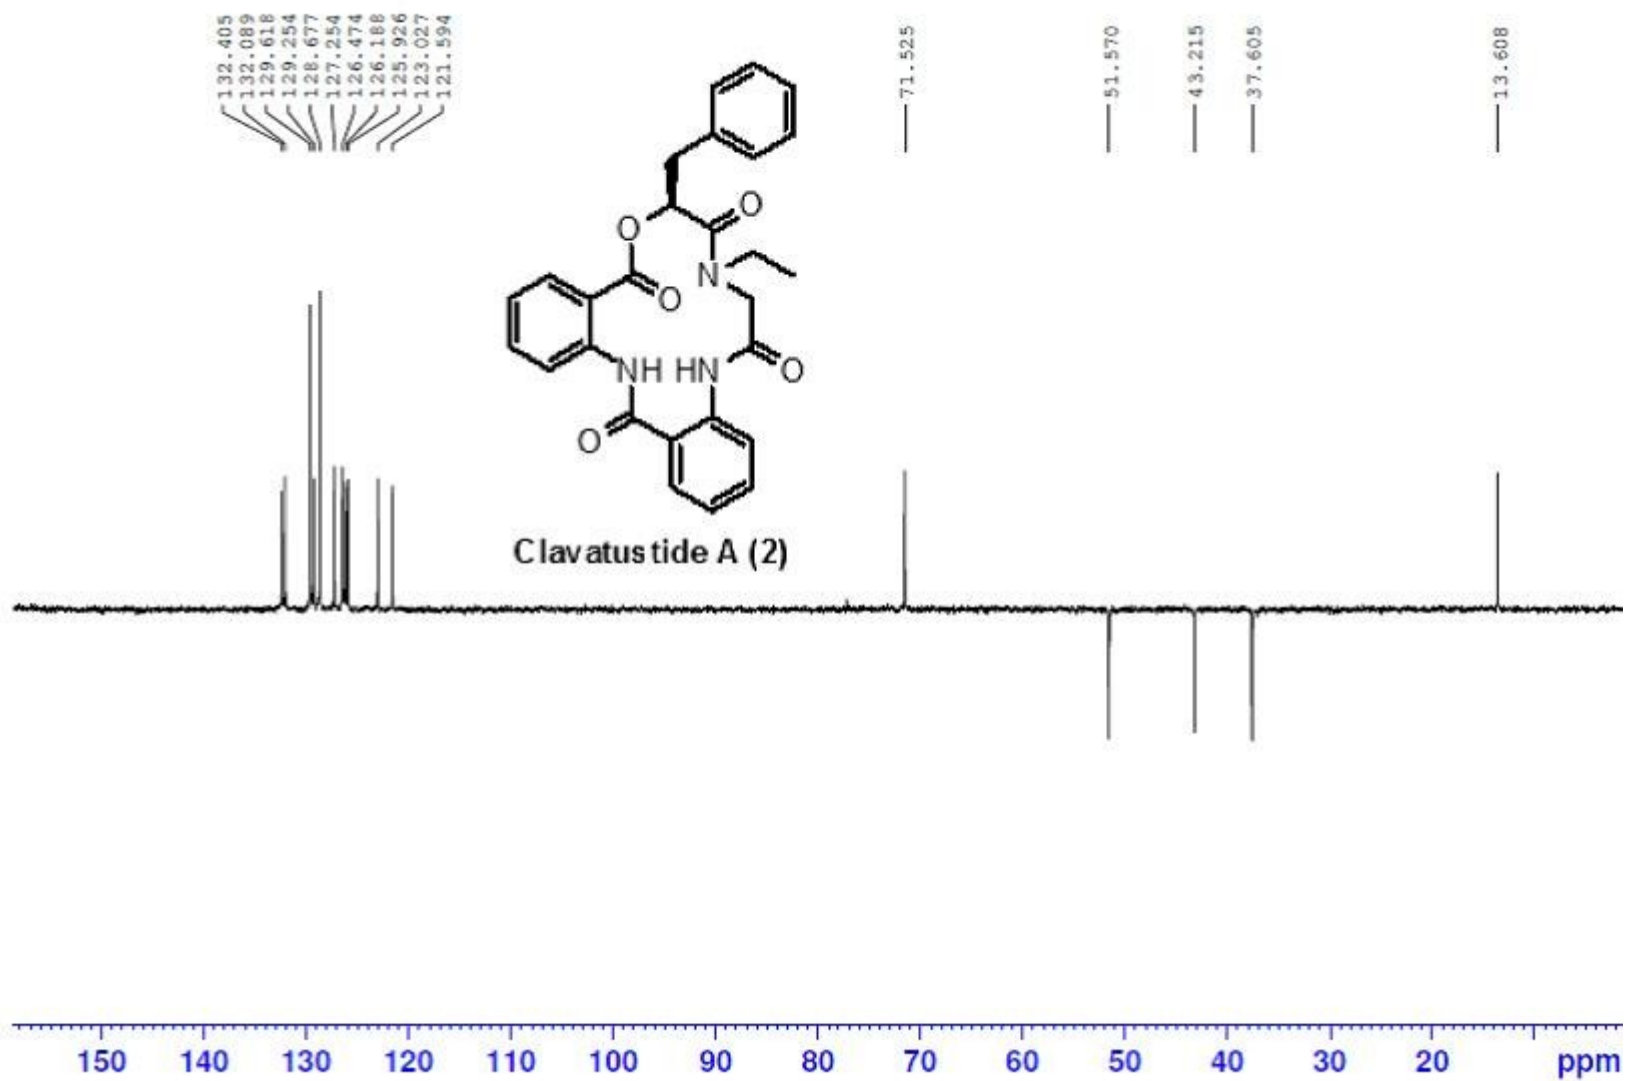



COSY NMR of enantiomer of Clavatuside A (2) in CDCl<sub>3</sub>

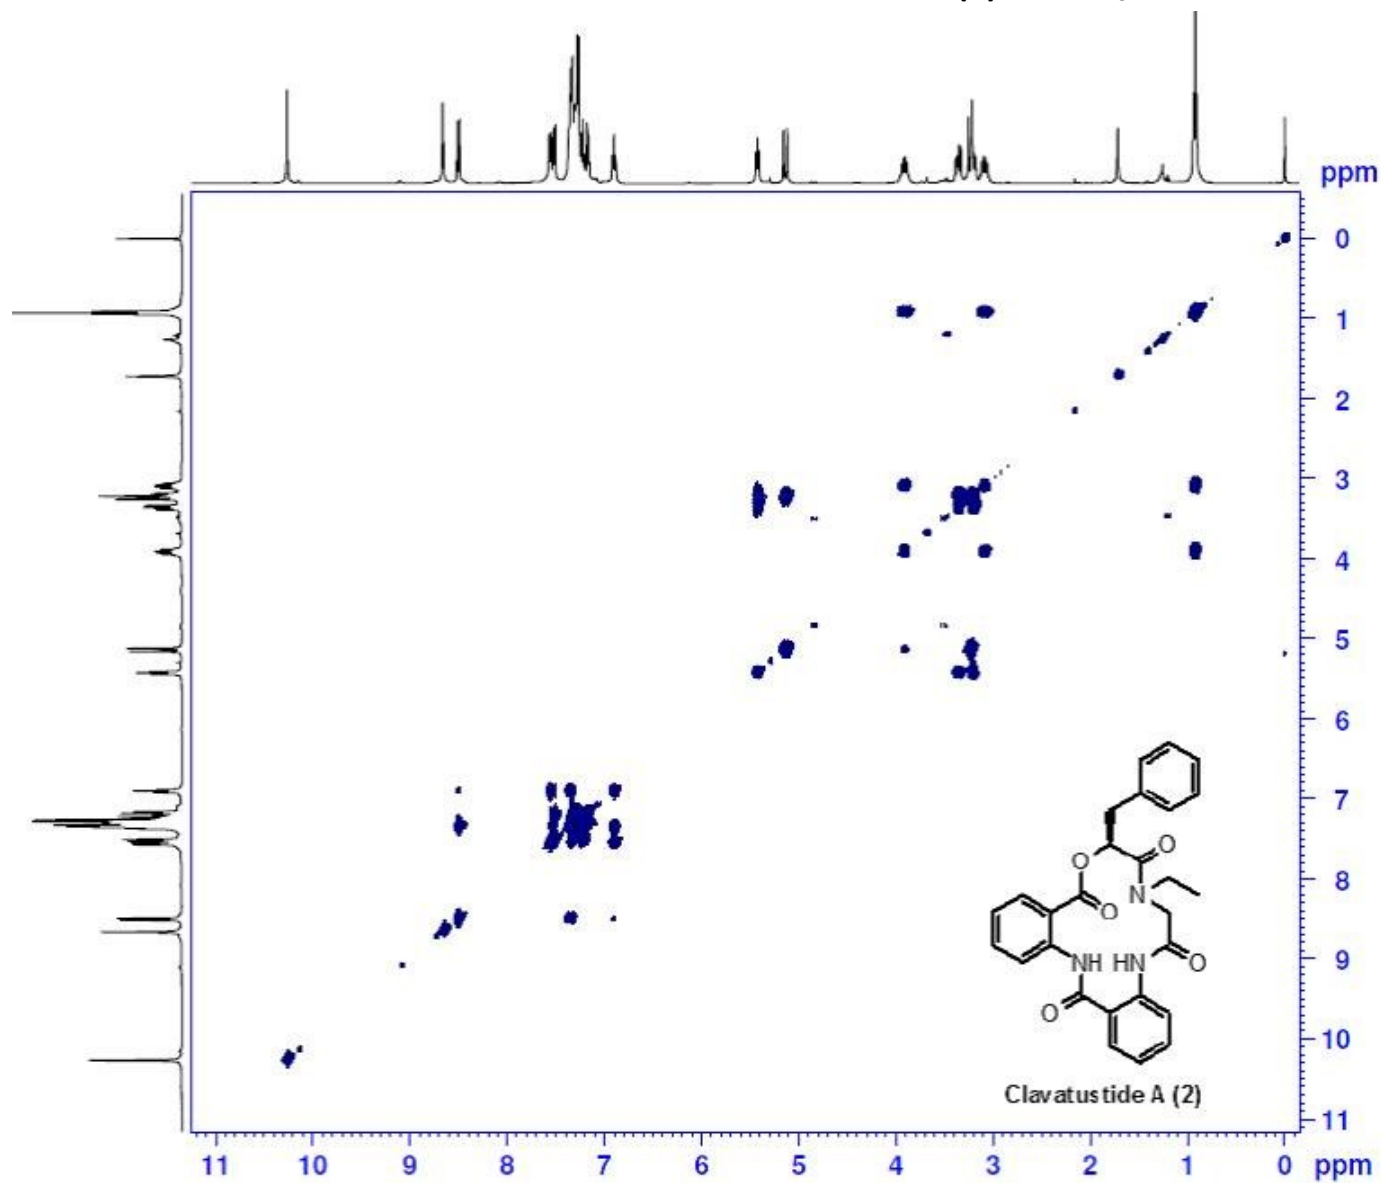

### HMBC NMR of Clavatuside A enantiomer (2) in CDCl<sub>3</sub>

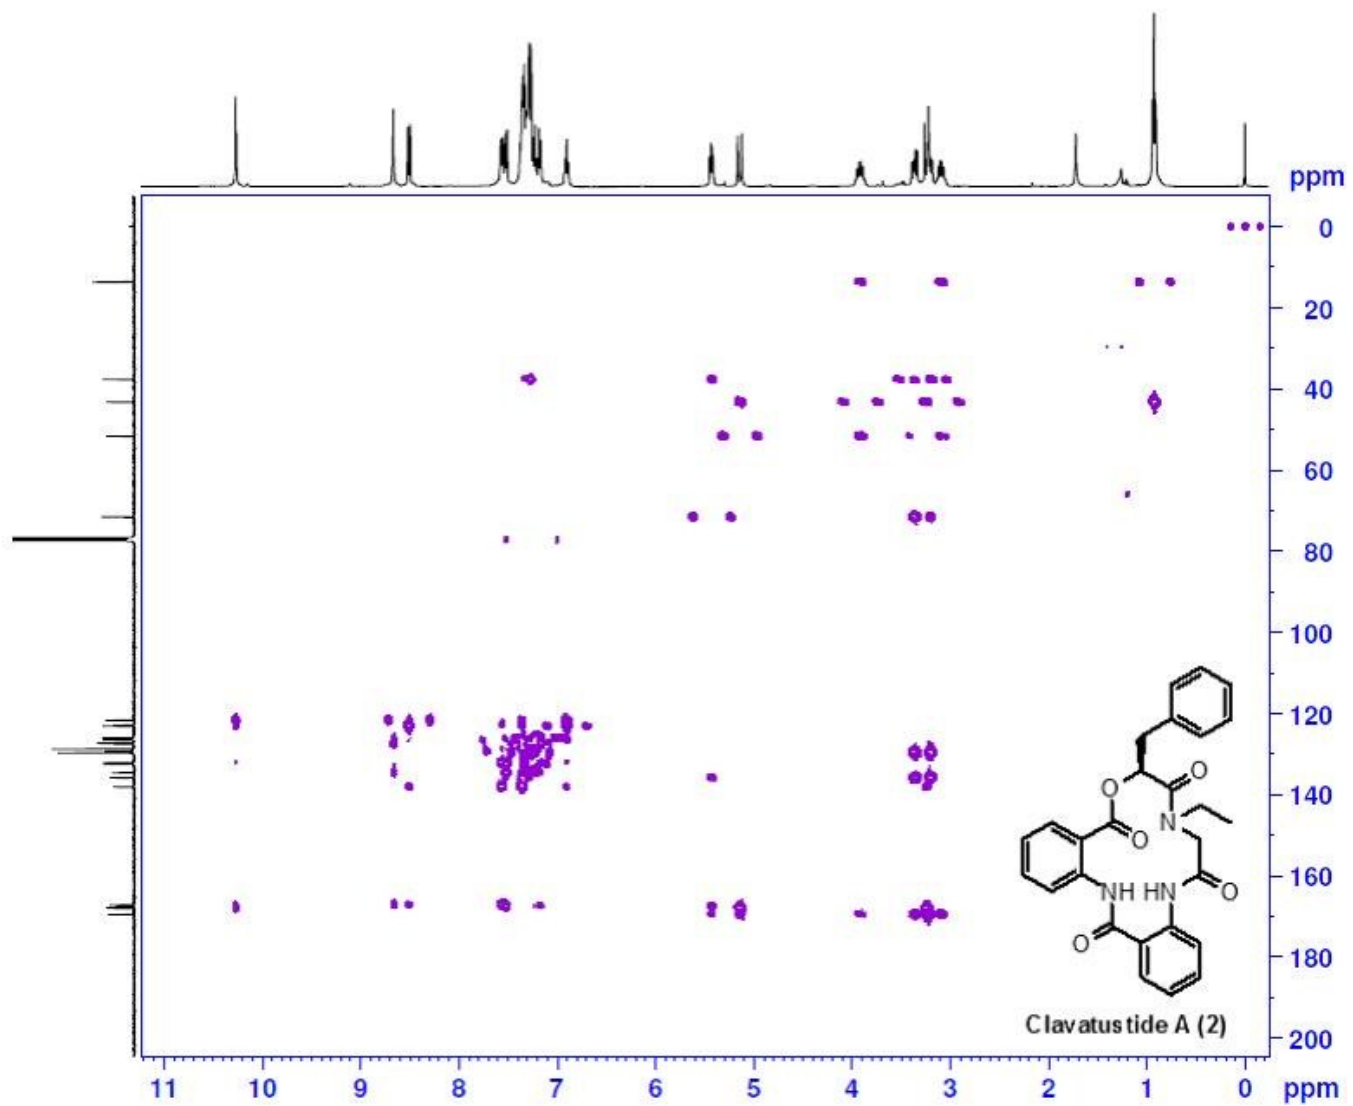

### HSQC of Clavatuside A enantiomer (2) in CDCl<sub>3</sub>

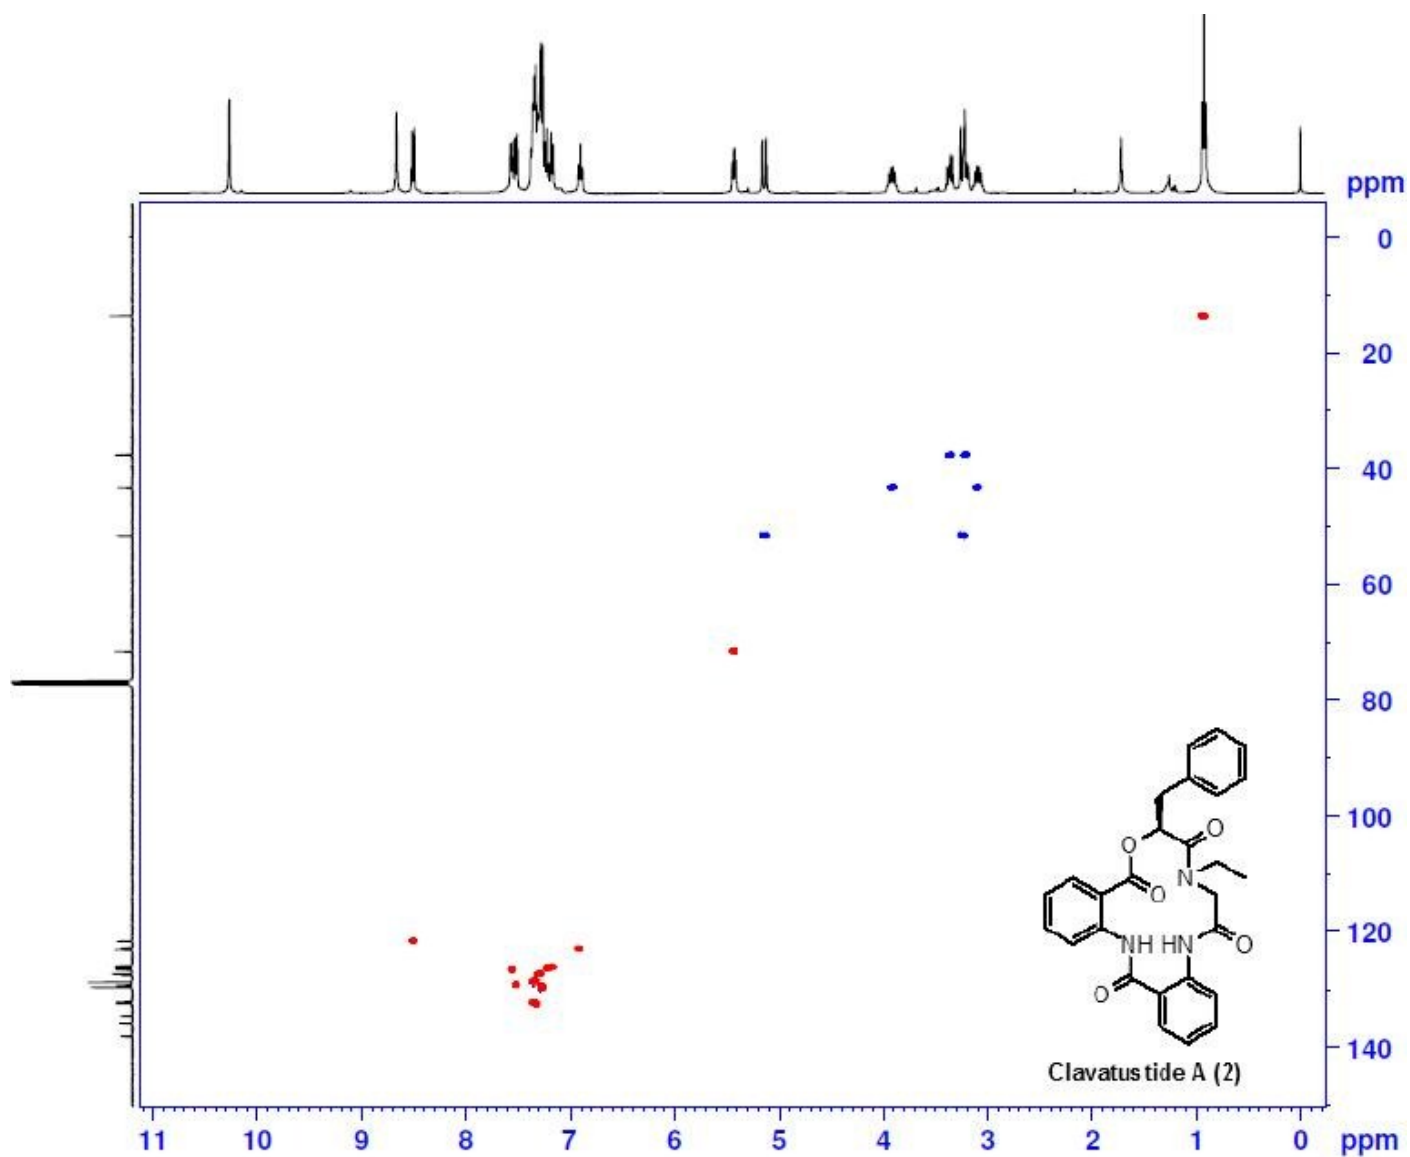

## HRMS of enantiomer of Clavatustide A (2)

### Elemental Composition Report

Page 1

#### Single Mass Analysis (displaying only valid results)

Tolerance = 1000.0 PPM / DBE: min = -1.5, max = 50.0

Selected filters: None

Monoisotopic Mass, Even Electron Ions

19 formula(e) evaluated with 1 results within limits (up to 50 closest results for each mass)

Elements Used:

C: 0-27 H: 0-26 N: 0-3 O: 0-5

SAMPLE CODE: GVKP-SK-B1329-72-S-1

12082015-009-GVKP-SK-B1329-72-S-1 15 (0.509) AM (Top,4, Ar,5000.0,195.10,1.00,LS 10); Sm (Mn, 2x1.00); Sb (35,40.00 )

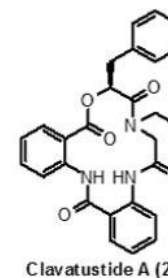

2: TOF MS ES+  
8.35e3

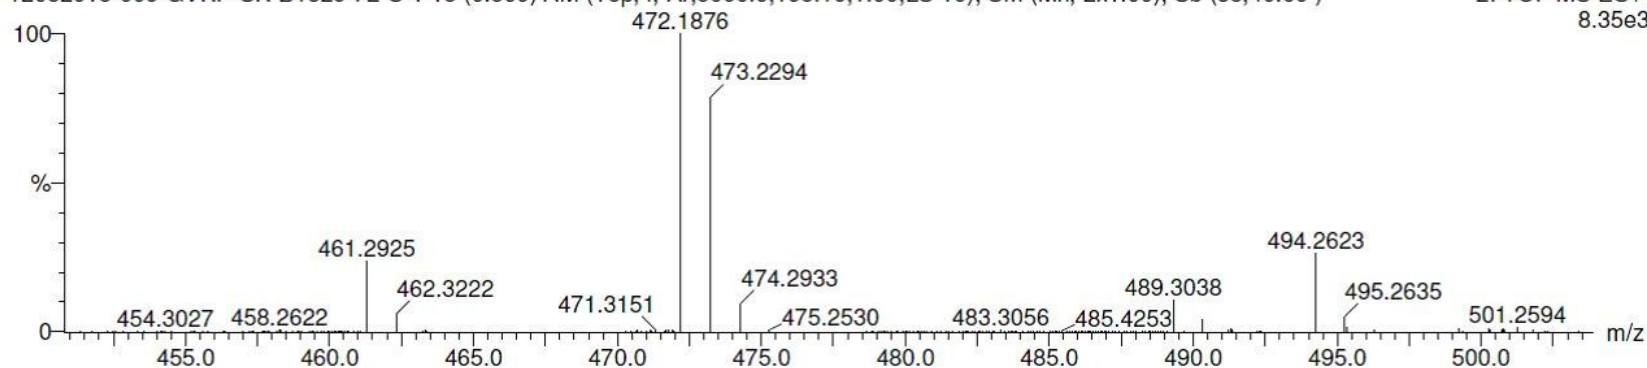

Minimum: -1.5  
Maximum: 5.0 1000.0 50.0

| Mass     | Calc. Mass | mDa | PPM | DBE  | i-FIT  | Formula       |
|----------|------------|-----|-----|------|--------|---------------|
| 472.1876 | 472.1872   | 0.4 | 0.8 | 16.5 | 1276.5 | C27 H26 N3 O5 |

## Racemic of Clavatuside A (1) and A (2)

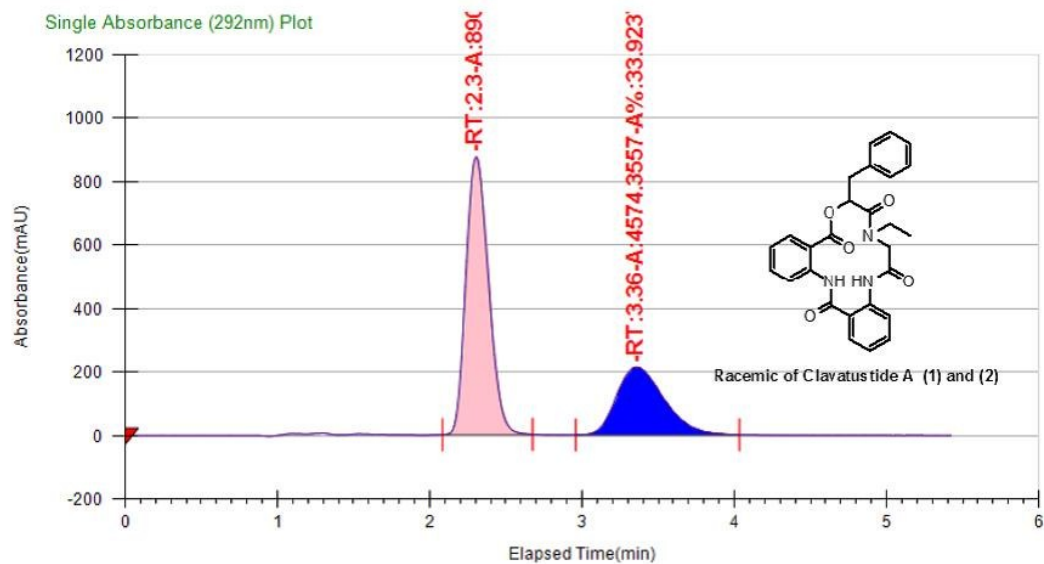

### General Information

| Log Author    | Log Date                 | Report By     | Report Date | Notes |
|---------------|--------------------------|---------------|-------------|-------|
| Administrator | 5/12/2015<br>10:42:31 AM | Administrator | 5/12/2015   |       |

### Run Information

| Instrument Method | Inj. Vol. | Solvent                 | Column                                 | Sample                                        | Well Location | Temp. | Flow | % Modifier | Pressure |
|-------------------|-----------|-------------------------|----------------------------------------|-----------------------------------------------|---------------|-------|------|------------|----------|
| 4g-40%-100bar     | 15        | 0.5% DEA in<br>METHANOL | CHIRALPAK<br>AS-H<br>(4.6*250)<br>mm5u | GVKP-SK-<br>B1329-<br>92+GVKP-SK-<br>B1329-72 | 11D           | 30    | 4    | 40         | 100      |

### Peak Information

| Peak No | % Area  | Area      | Ret. Time | Height   | Cap. Factor |
|---------|---------|-----------|-----------|----------|-------------|
| 1       | 66.0763 | 8909.8929 | 2.3 min   | 874.4468 | 0           |
| 2       | 33.9237 | 4574.3557 | 3.36 min  | 213.3956 | 0           |

## Chiral HPLC of Clavatustide A (1)

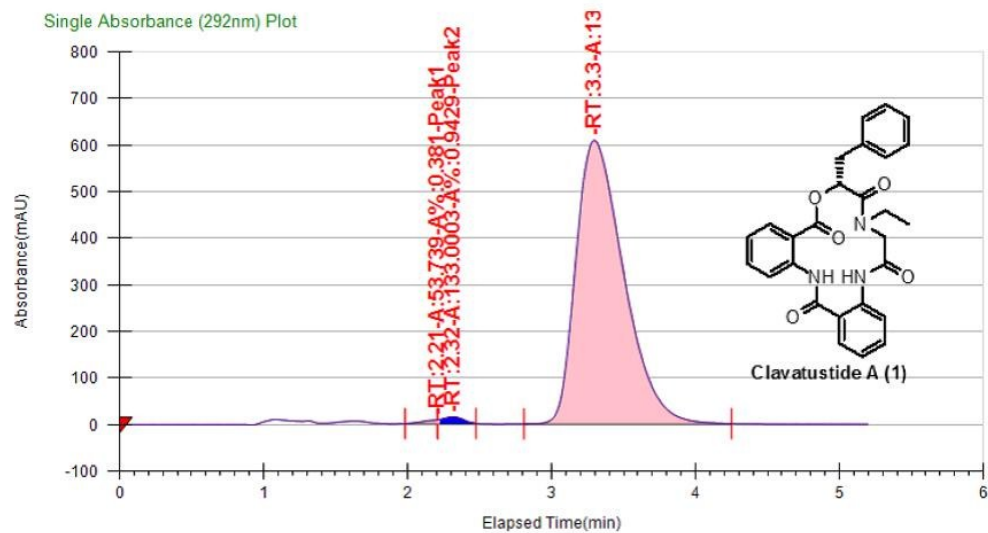

### General Information

| Log Author    | Log Date                 | Report By     | Report Date | Notes |
|---------------|--------------------------|---------------|-------------|-------|
| Administrator | 5/12/2015<br>10:58:46 AM | Administrator | 5/12/2015   |       |

### Run Information

| Instrument Method | Inj. Vol. | Solvent                 | Column                                 | Sample               | Well Location | Temp. | Flow | % Modifier | Pressure |
|-------------------|-----------|-------------------------|----------------------------------------|----------------------|---------------|-------|------|------------|----------|
| 4g-40%-100bar     | 15        | 0.5% DEA in<br>METHANOL | CHIRALPAK<br>AS-H<br>(4.6*250)<br>mm5u | GVKP-SK-<br>B1329-92 | 13D           | 30    | 4    | 40         | 100      |

### Peak Information

| Peak No | % Area  | Area       | Ret. Time | Height   | Cap. Factor |
|---------|---------|------------|-----------|----------|-------------|
| 1       | 0.381   | 53.739     | 2.21 min  | 8.1378   | 0           |
| 2       | 0.9429  | 133.0003   | 2.32 min  | 14.1061  | 0           |
| 3       | 98.6761 | 13918.4041 | 3.3 min   | 608.2497 | 0           |

## Chiral HPLC of Clavatuside A enantiomer (2)

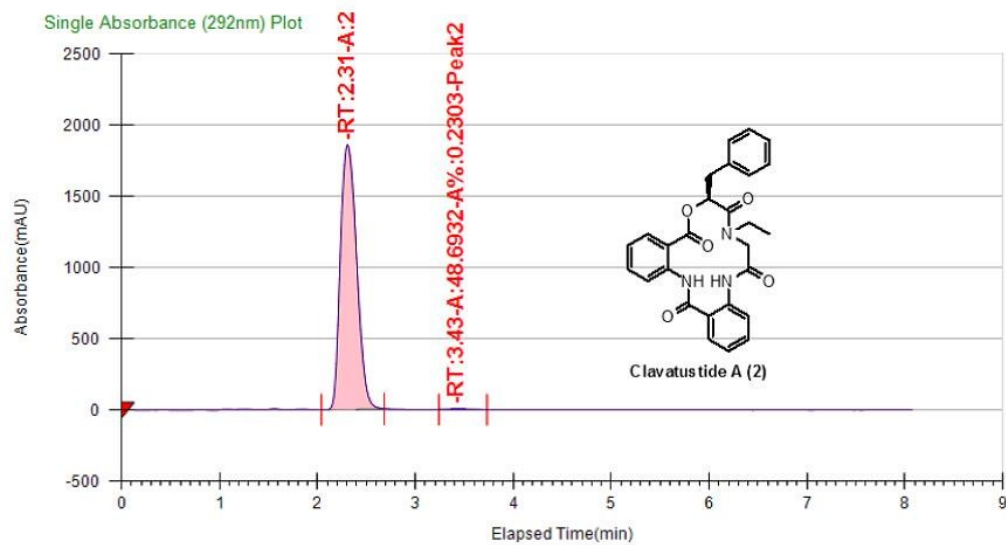

### General Information

| Log Author    | Log Date                 | Report By     | Report Date | Notes |
|---------------|--------------------------|---------------|-------------|-------|
| Administrator | 5/12/2015<br>10:49:19 AM | Administrator | 5/12/2015   |       |

### Run Information

| Instrument Method | Inj. Vol. | Solvent                 | Column                                 | Sample               | Well Location | Temp. | Flow | % Modifier | Pressure |
|-------------------|-----------|-------------------------|----------------------------------------|----------------------|---------------|-------|------|------------|----------|
| 4g-40%-100bar     | 15        | 0.5% DEA in<br>METHANOL | CHIRALPAK<br>AS-H<br>(4.6*250)<br>mm5u | GVKP-SK-<br>B1329-72 | 12D           | 30    | 4    | 40         | 100      |

### Peak Information

| Peak No | % Area  | Area       | Ret. Time | Height    | Cap. Factor |
|---------|---------|------------|-----------|-----------|-------------|
| 1       | 99.7697 | 21097.0338 | 2.31 min  | 1858.3254 | 0           |
| 2       | 0.2303  | 48.6932    | 3.43 min  | 3.0338    | 0           |

<sup>1</sup>H NMR of Clavatustide B (3) in CDCl<sub>3</sub>

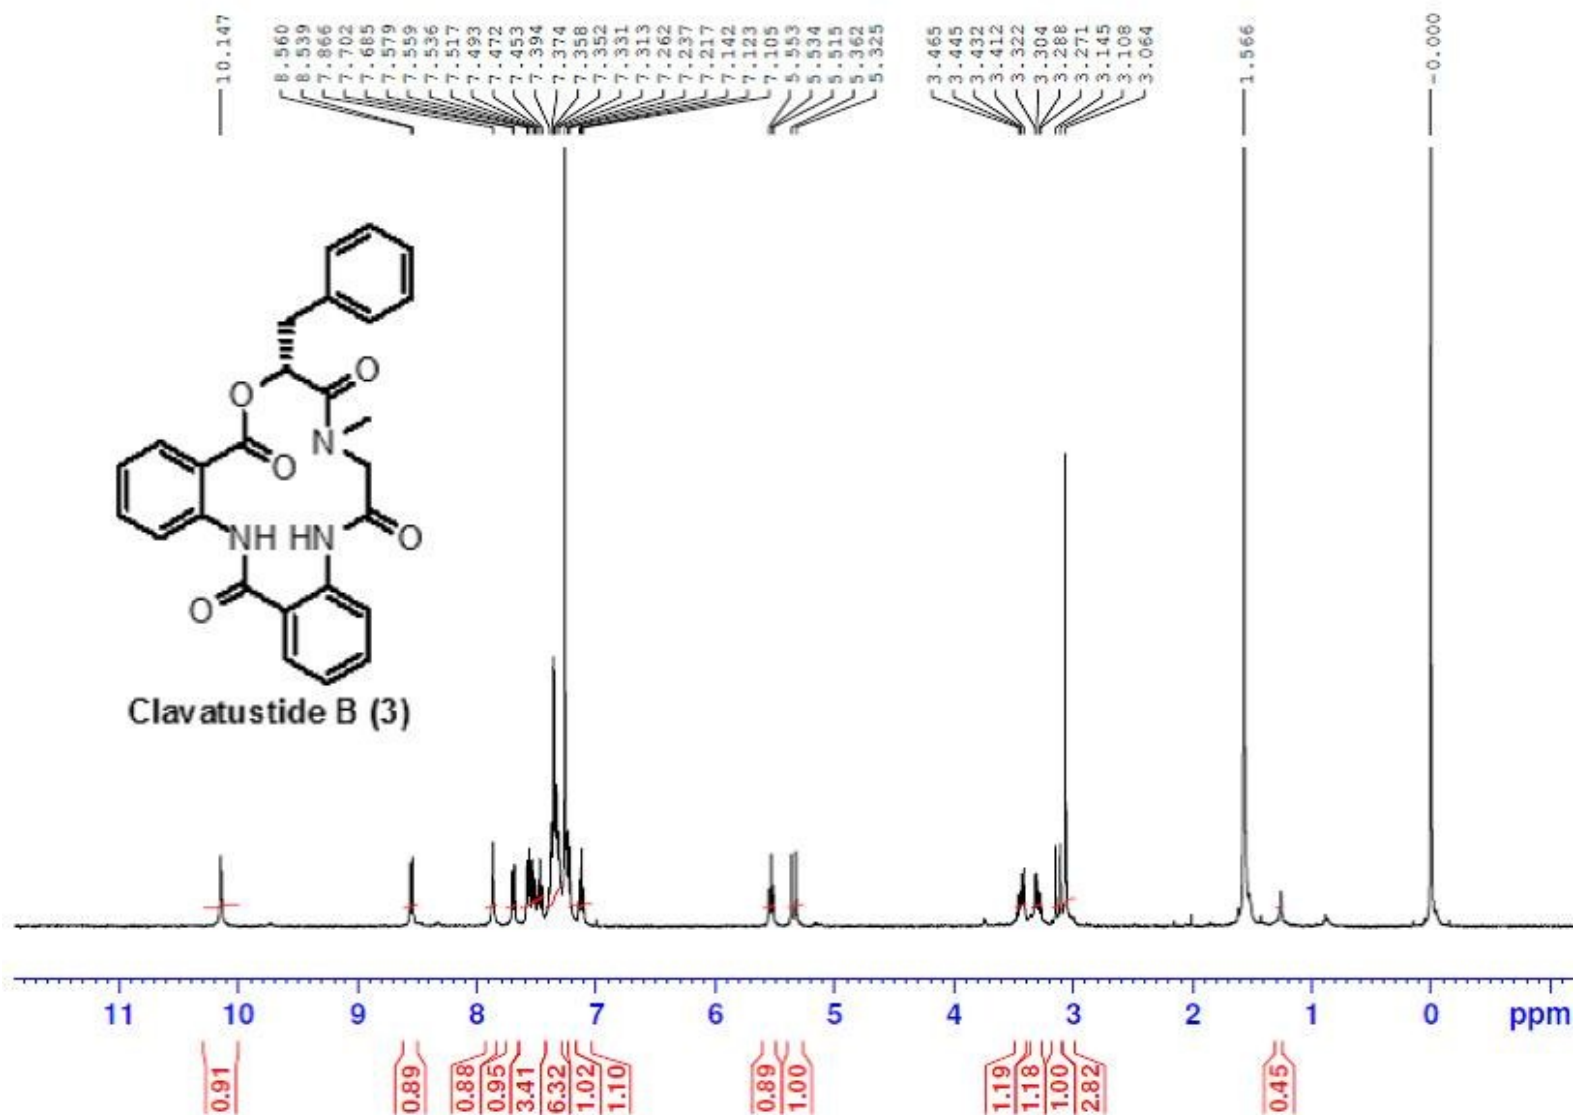



D<sub>2</sub>O exchange <sup>1</sup>H NMR of Clavatustide B (3) in CDCl<sub>3</sub>

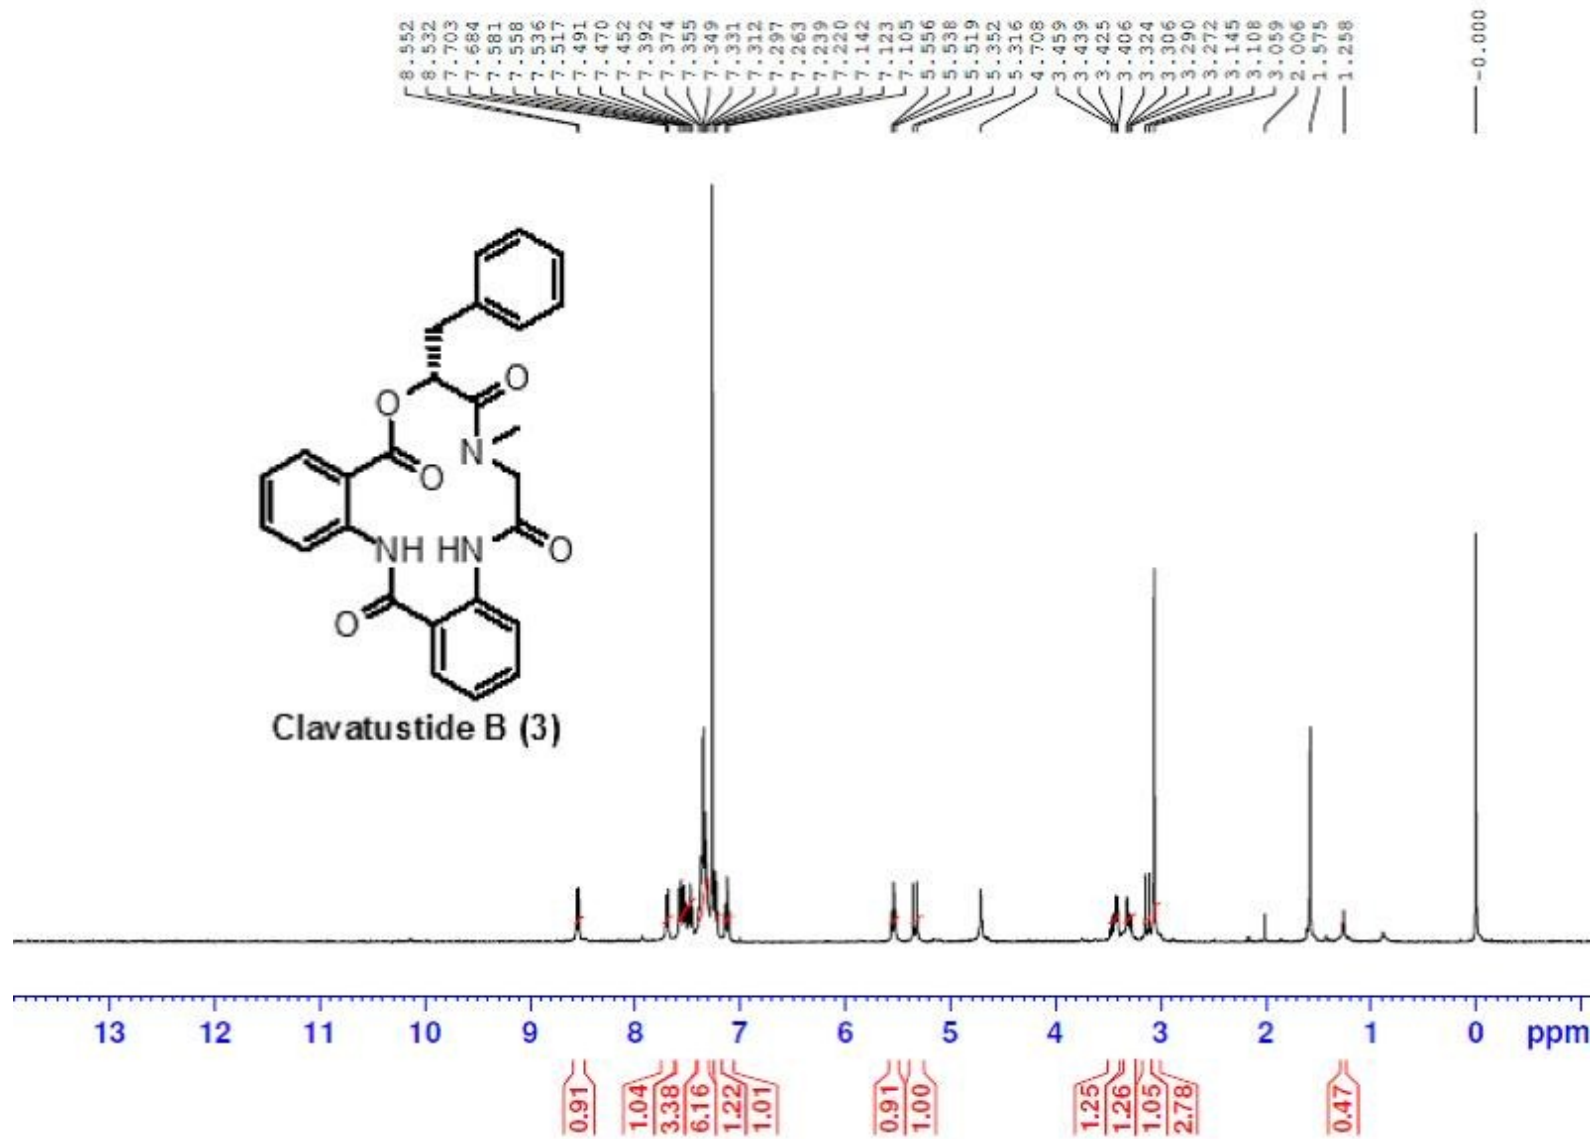

<sup>13</sup>C NMR of Clavatustide B (3) in CDCl<sub>3</sub>

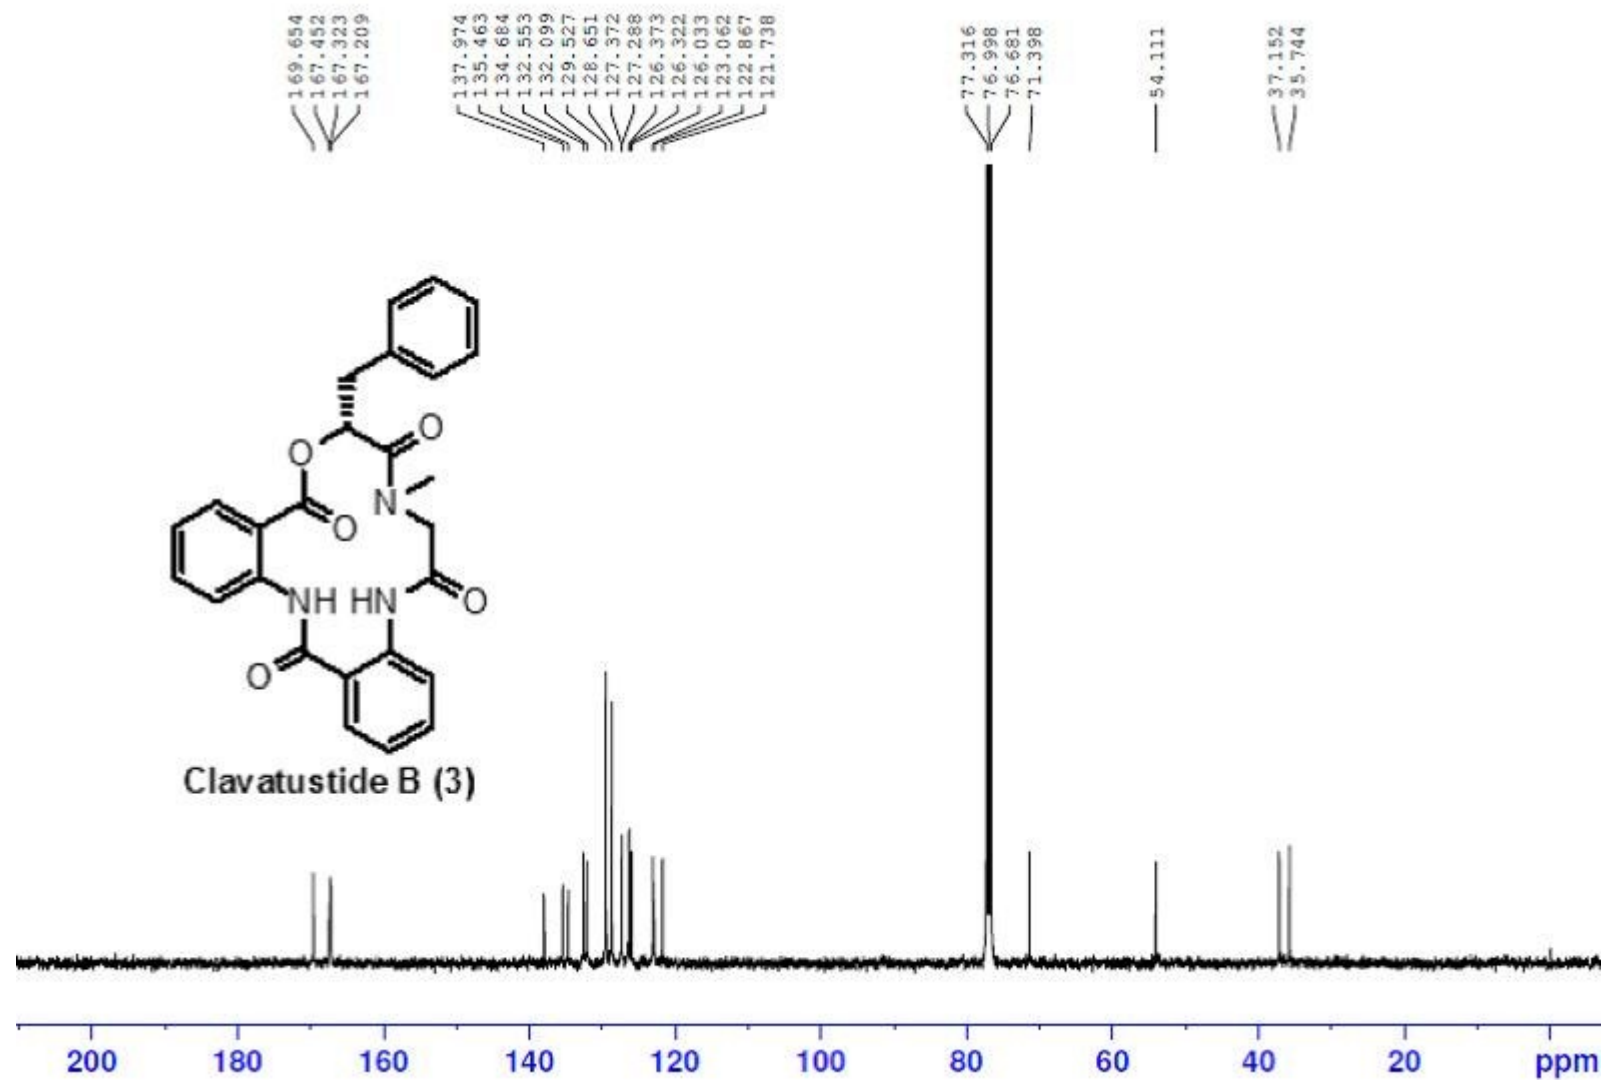

### DEPT NMR of Clavatustide B (3) in CDCl<sub>3</sub>

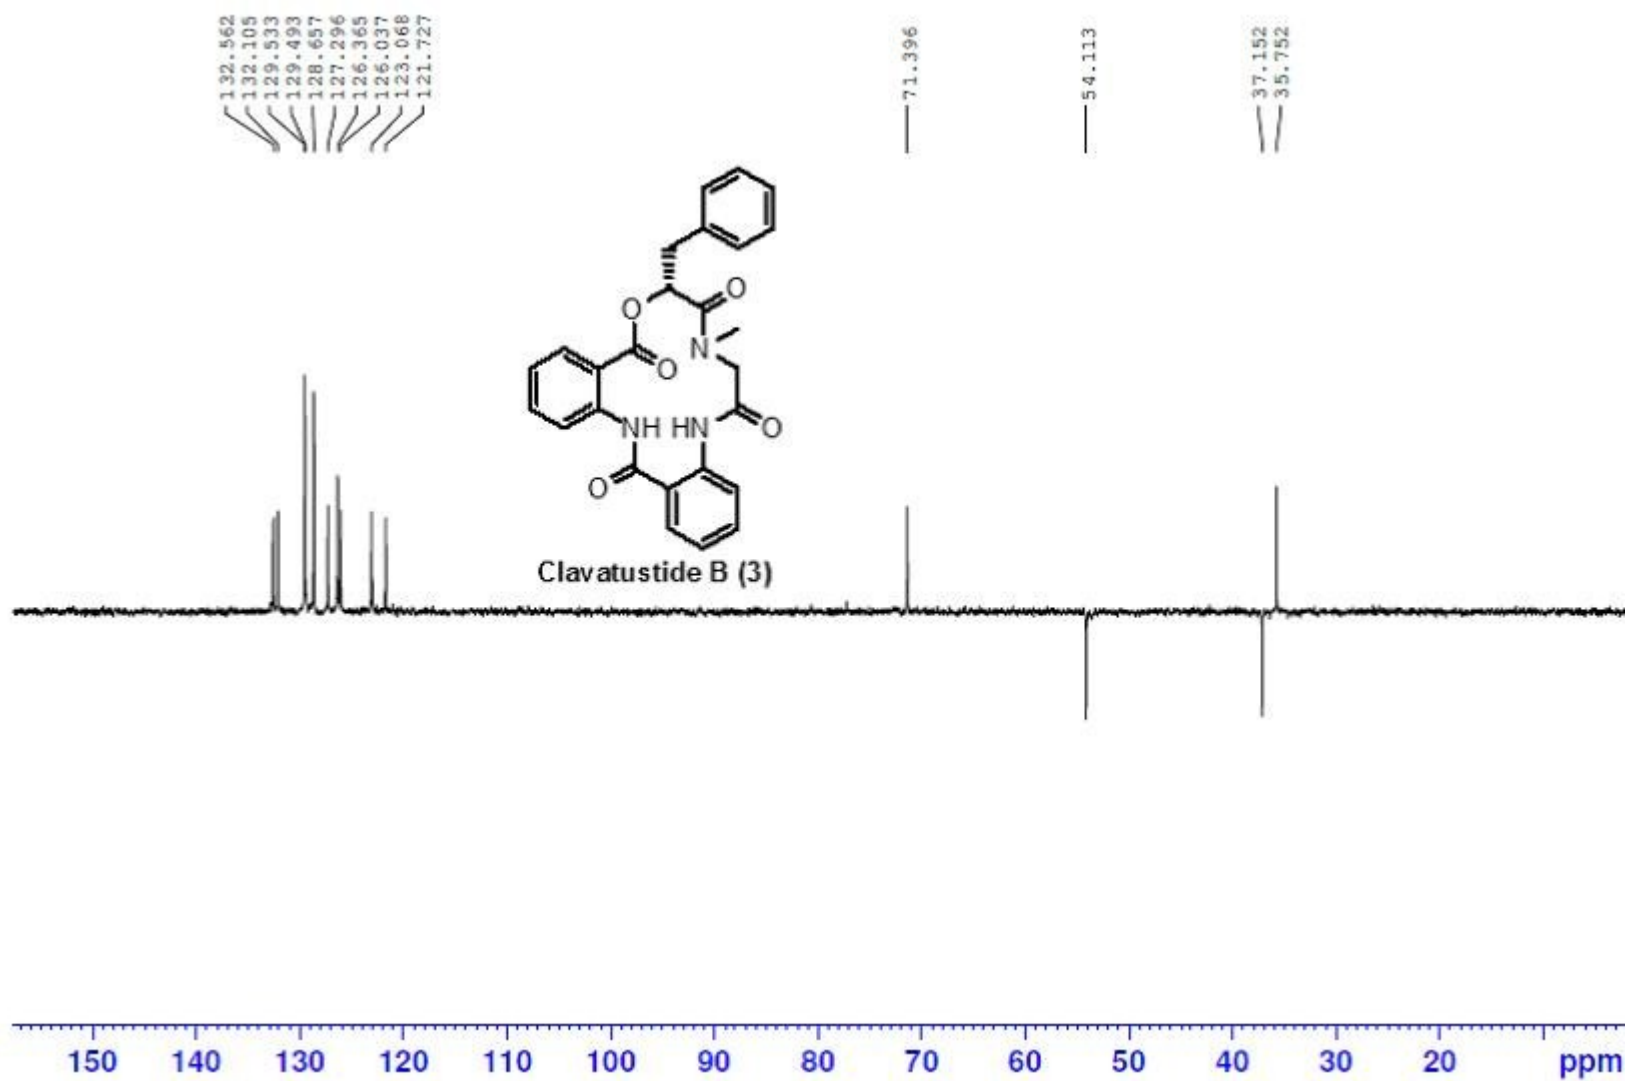

COSY NMR of Clavatustide B (3) in CDCl<sub>3</sub>

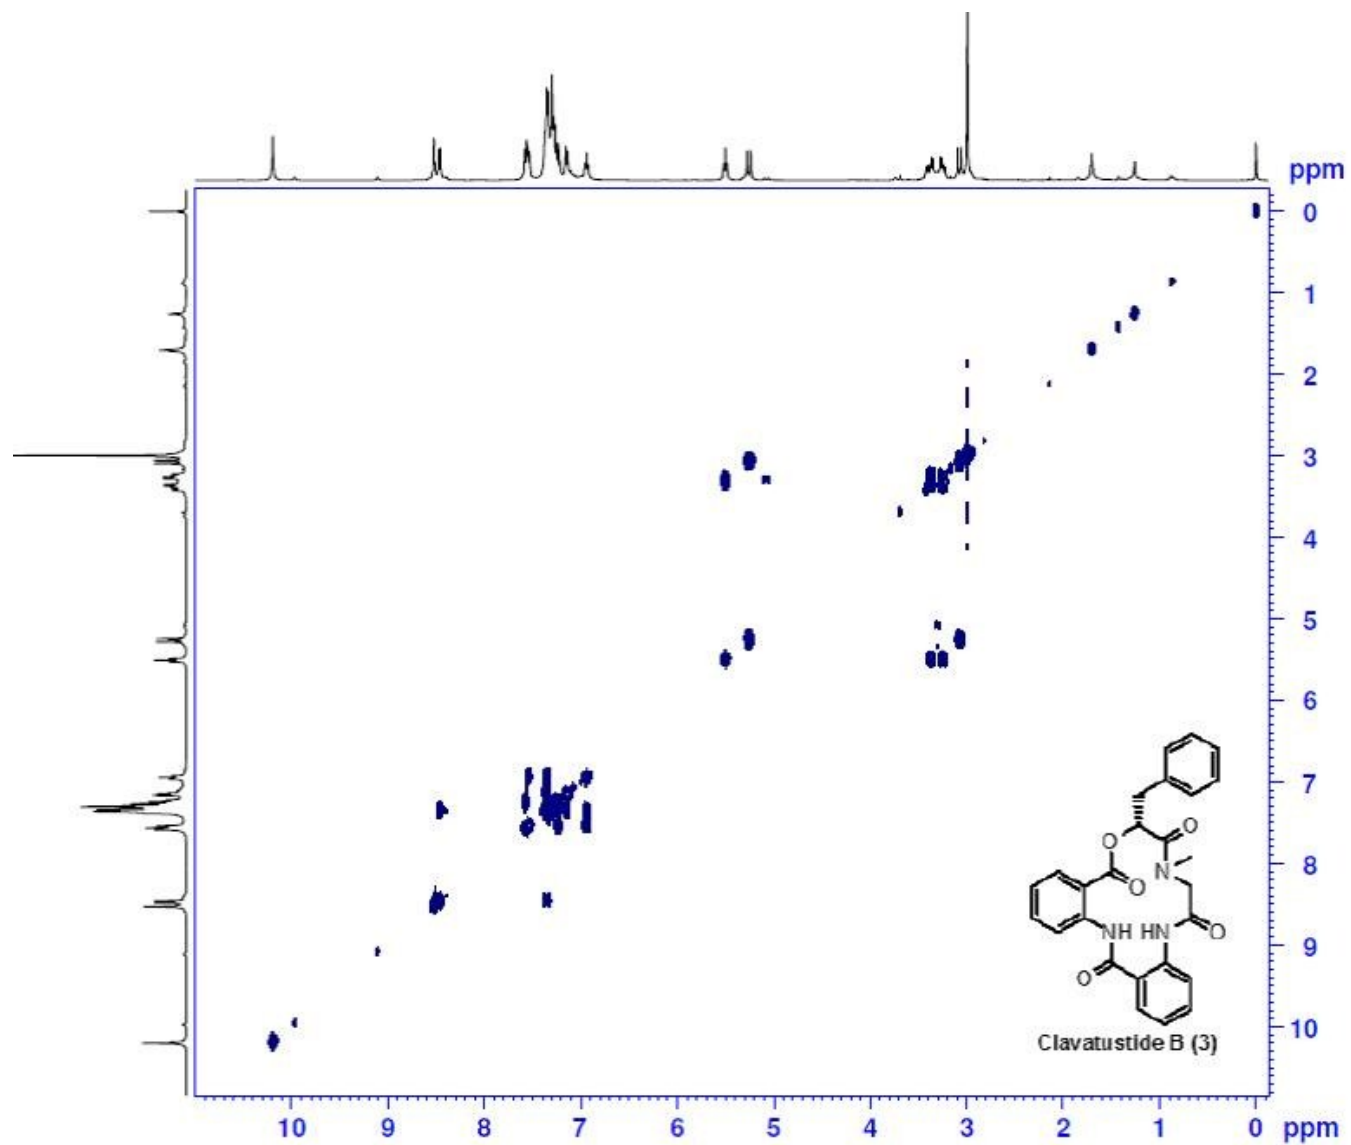

### HMBC NMR of Clavatustide B (3) in CDCl<sub>3</sub>

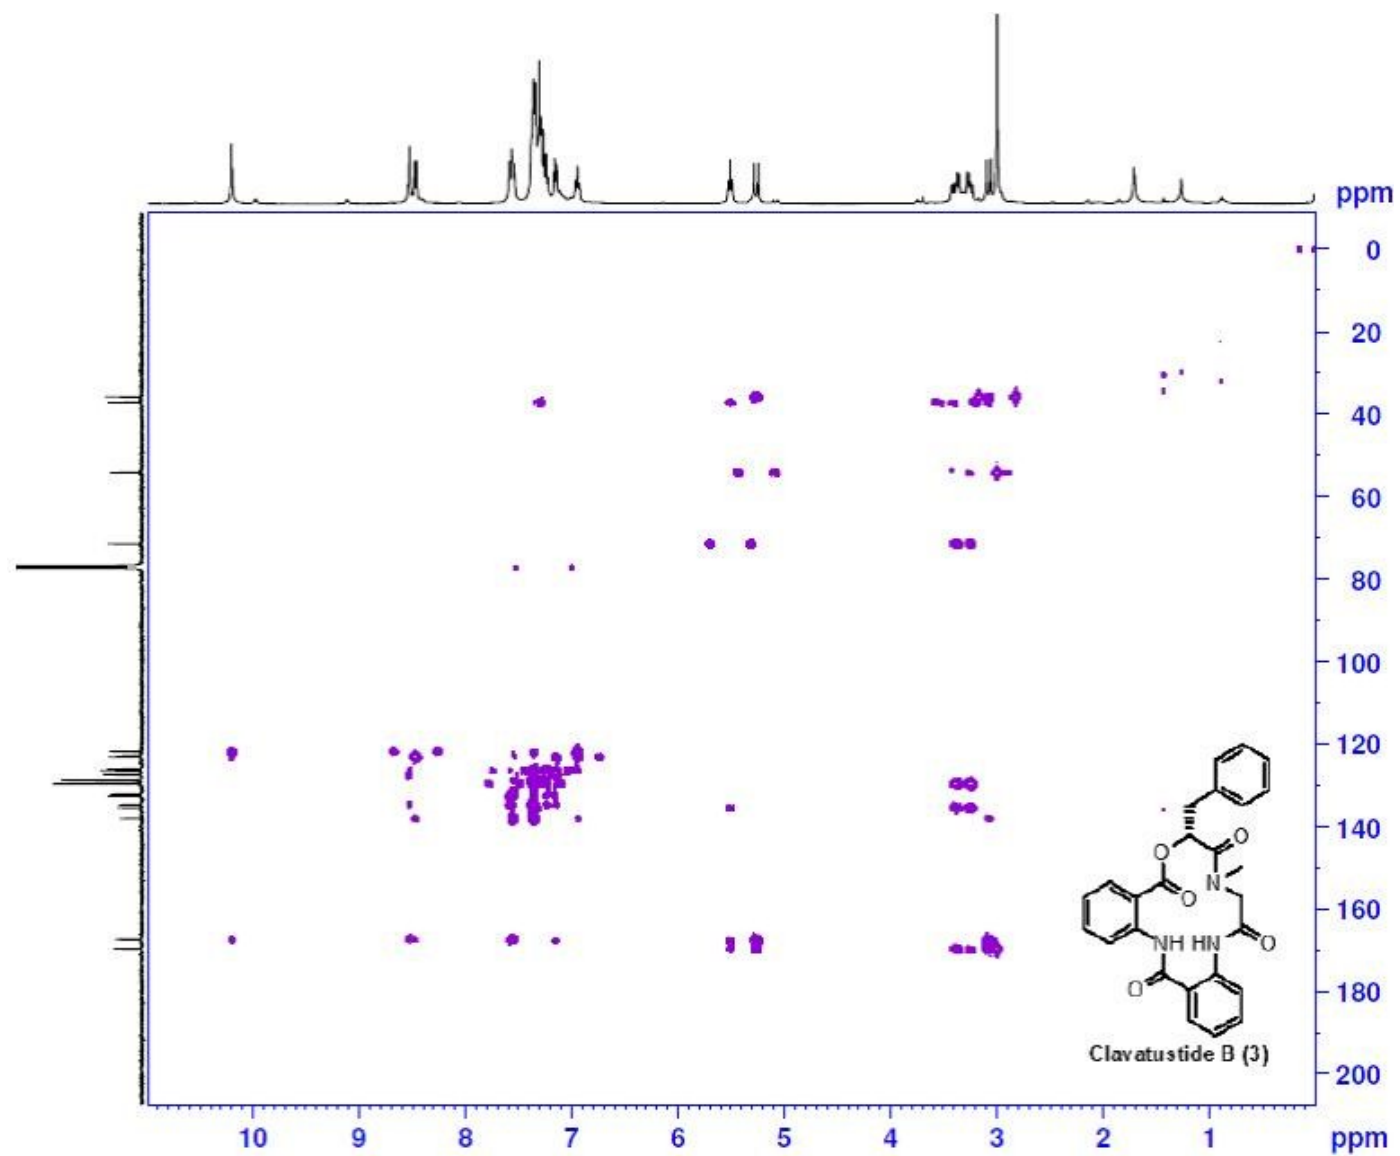

### HSQC NMR of Clavatustide B (3) in CDCl<sub>3</sub>

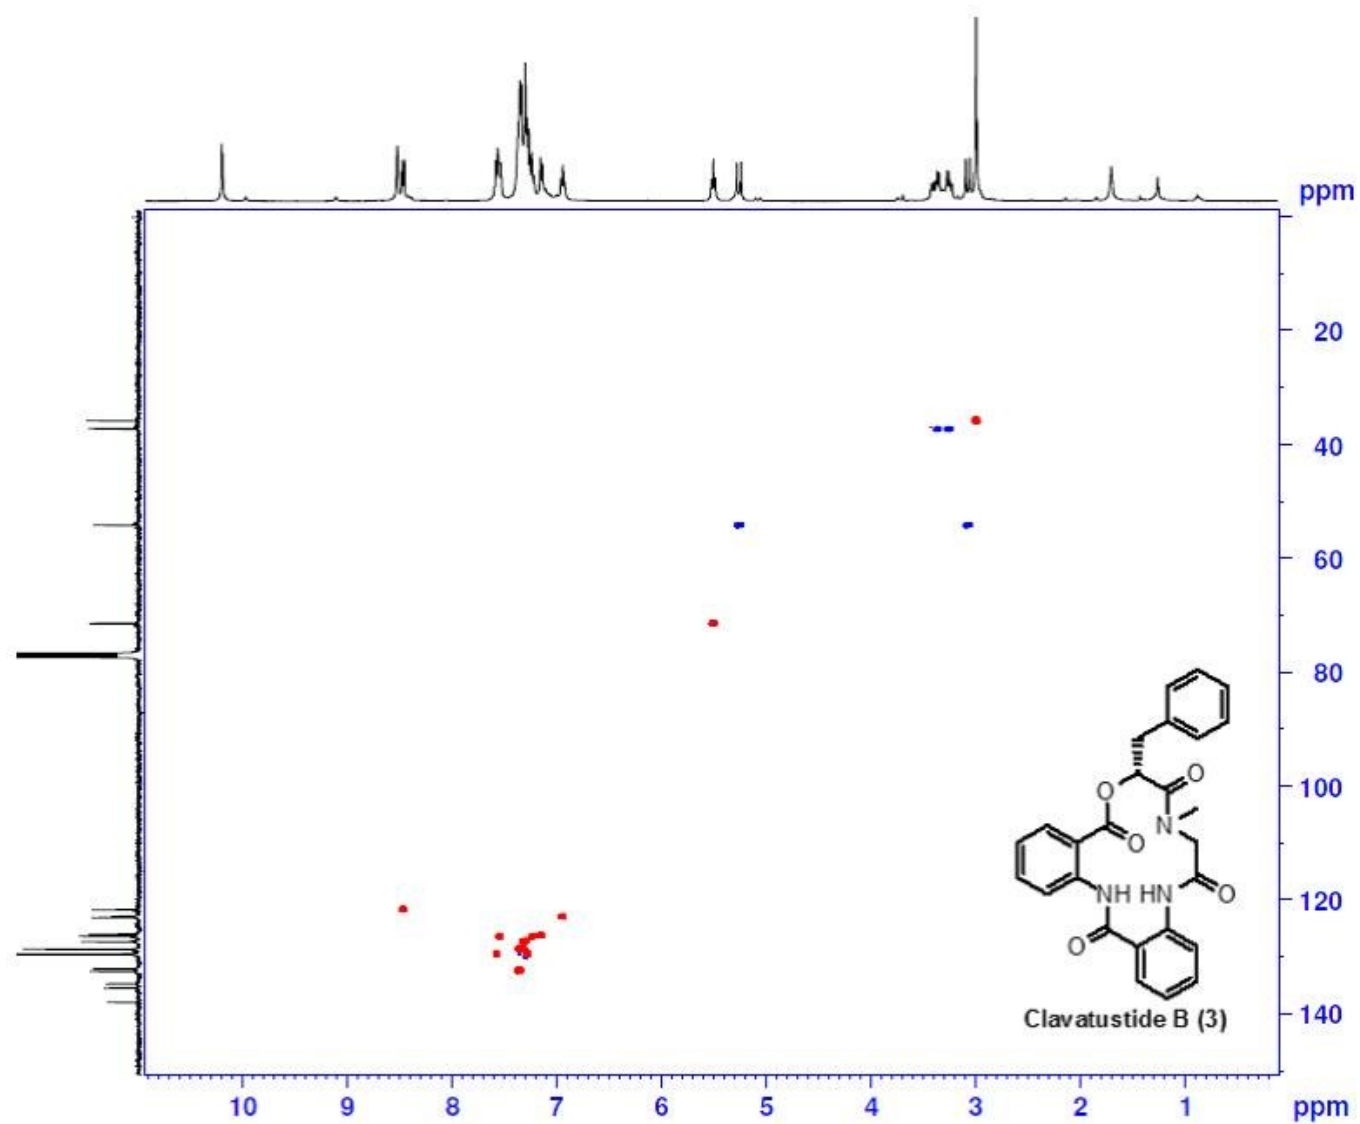

## HRMS of Clavatustide B (3)

### Elemental Composition Report

Page 1

#### Single Mass Analysis (displaying only valid results)

Tolerance = 1000.0 PPM / DBE: min = -1.5, max = 50.0

Selected filters: None

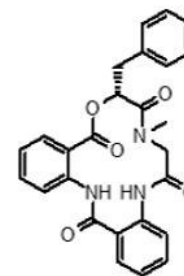

Clavatustide B (3)

Monoisotopic Mass, Even Electron Ions

19 formula(e) evaluated with 1 results within limits (up to 50 closest results for each mass)

Elements Used:

C: 0-26 H: 0-24 N: 0-3 O: 0-5

SAMPLE CODE: GVKP-SK-B1329-86-R-1

12082015-015-GVKP-SK-B1329-86-R-1 16 (0.539) AM (Top,4, Ar,5000.0,195.10,1.00,LS 10); Sm (Mn, 2x1.00); Sb (35,40.00)

2: TOF MS ES+  
7.16e3

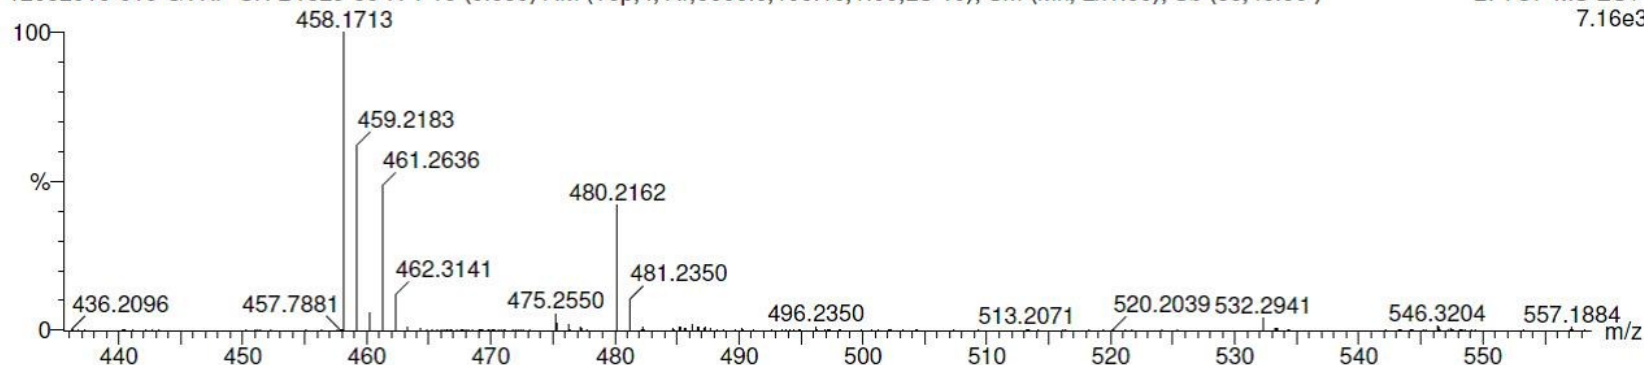

Minimum: -1.5

Maximum: 5.0 1000.0 50.0

| Mass     | Calc. Mass | mDa  | PPM  | DBE  | i-FIT | Formula       |
|----------|------------|------|------|------|-------|---------------|
| 458.1713 | 458.1716   | -0.3 | -0.7 | 16.5 | 653.4 | C26 H24 N3 O5 |

<sup>1</sup>H NMR of Clavatustide B enantiomer (4) in CDCl<sub>3</sub>

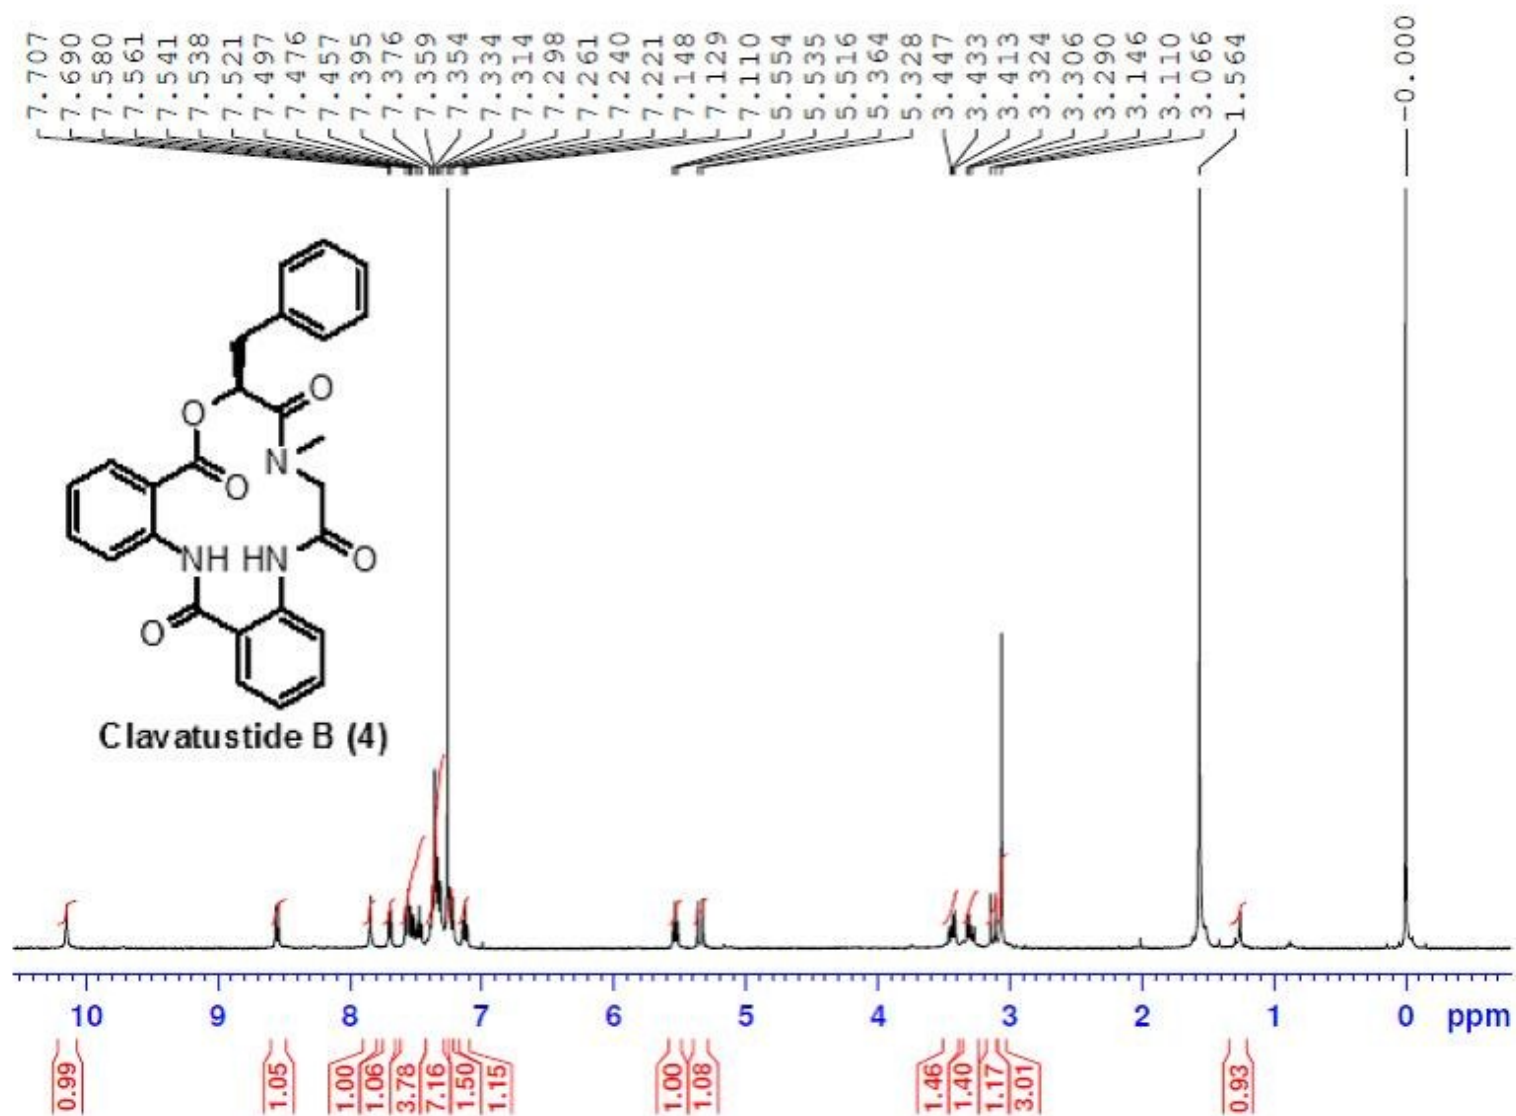



D<sub>2</sub>O exchange <sup>1</sup>H NMR of Clavatustide B enantiomer (4) in CDCl<sub>3</sub>

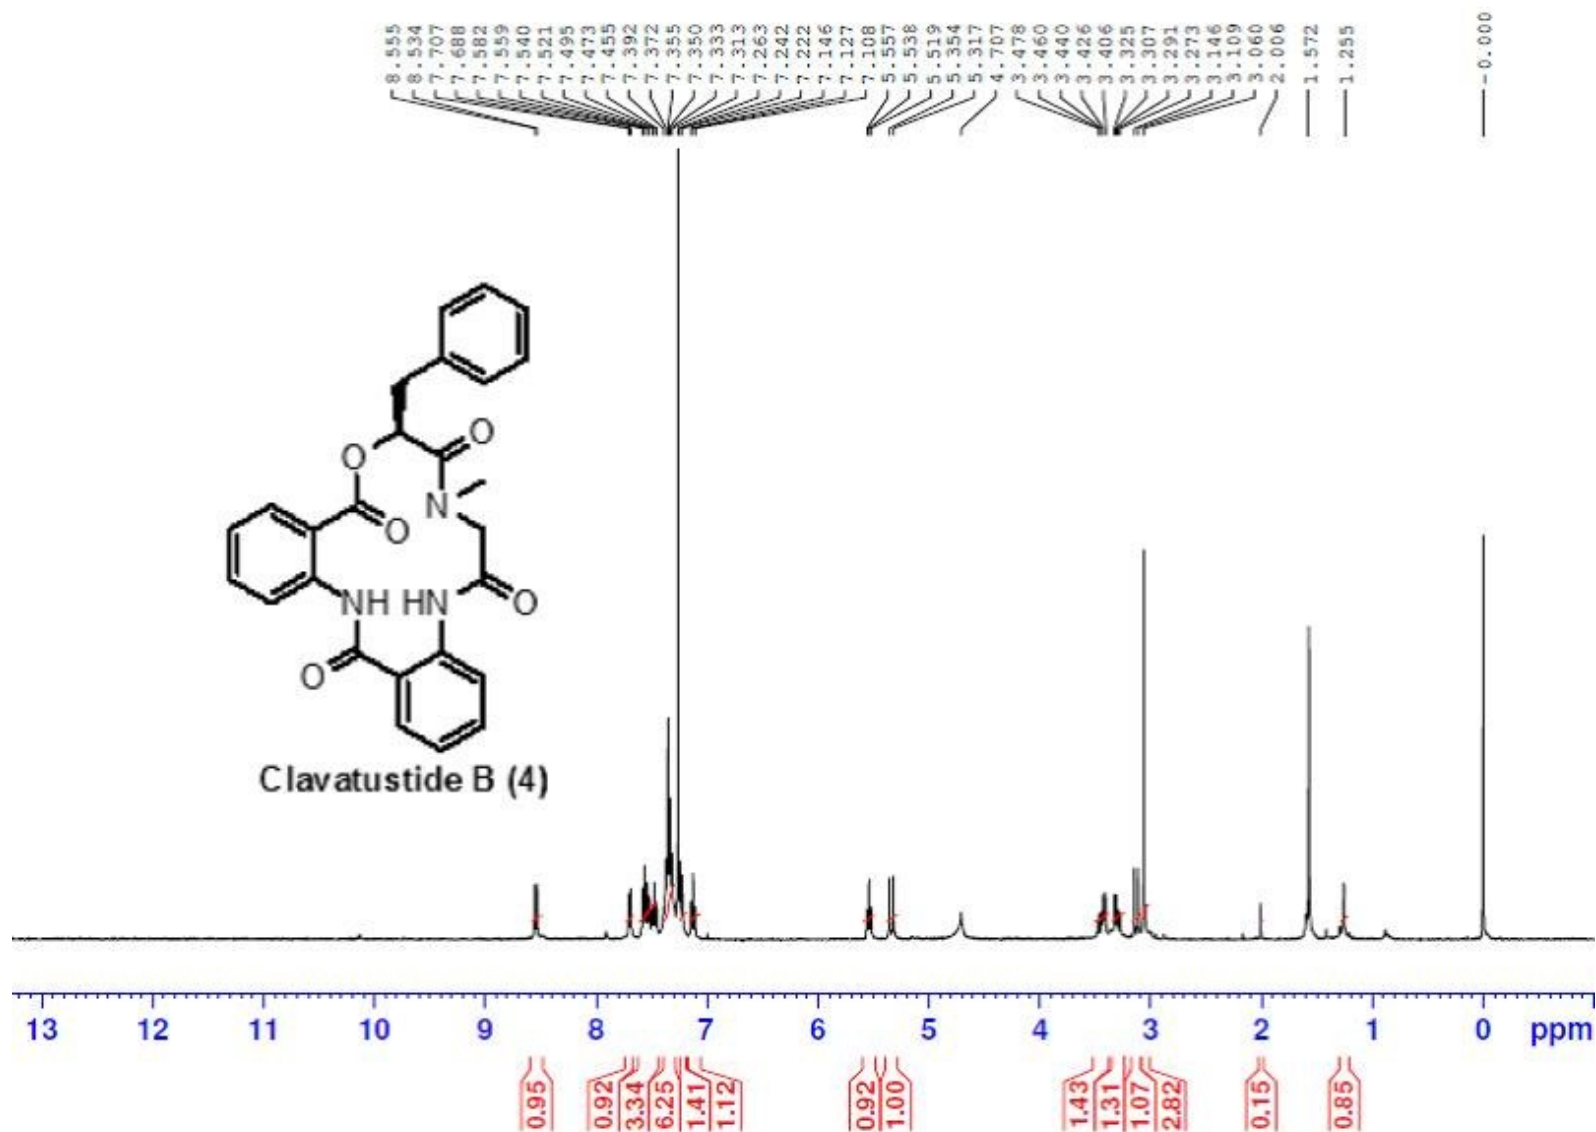

**$^{13}\text{C}$  NMR of Clavatustide B enantiomer (4) in  $\text{CDCl}_3$**

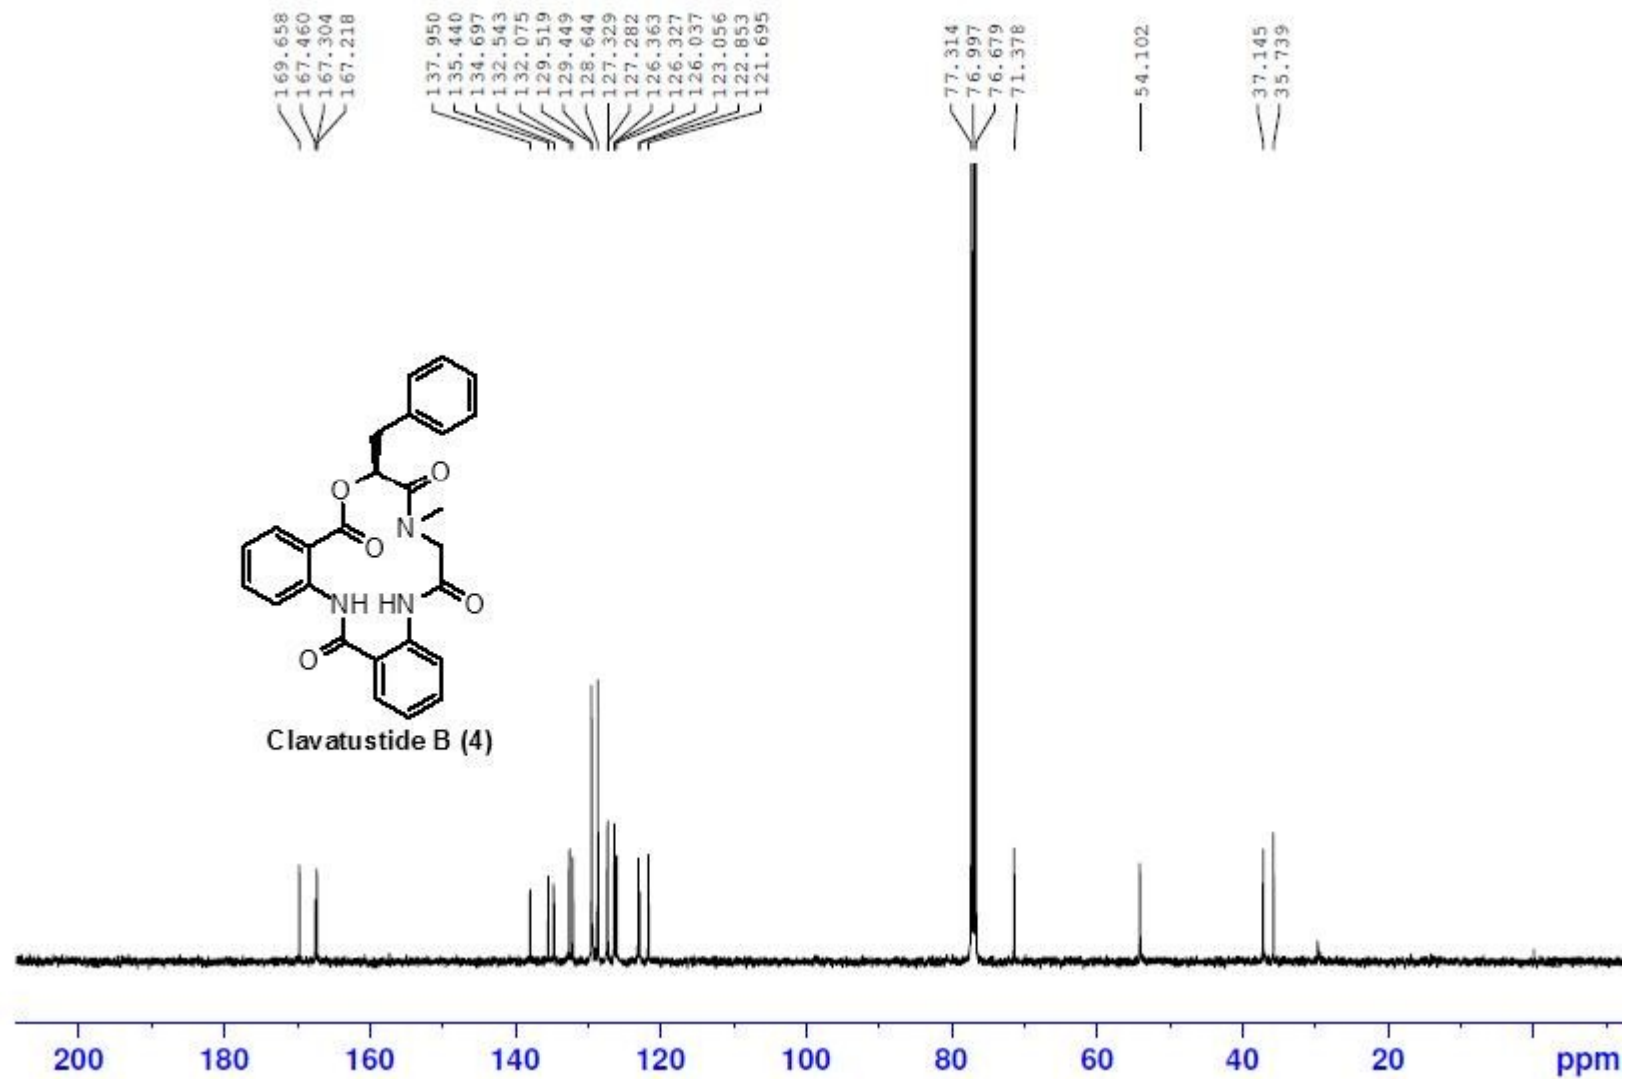

DEPT NMR of Clavatustide B enantiomer (4) in CDCl<sub>3</sub>

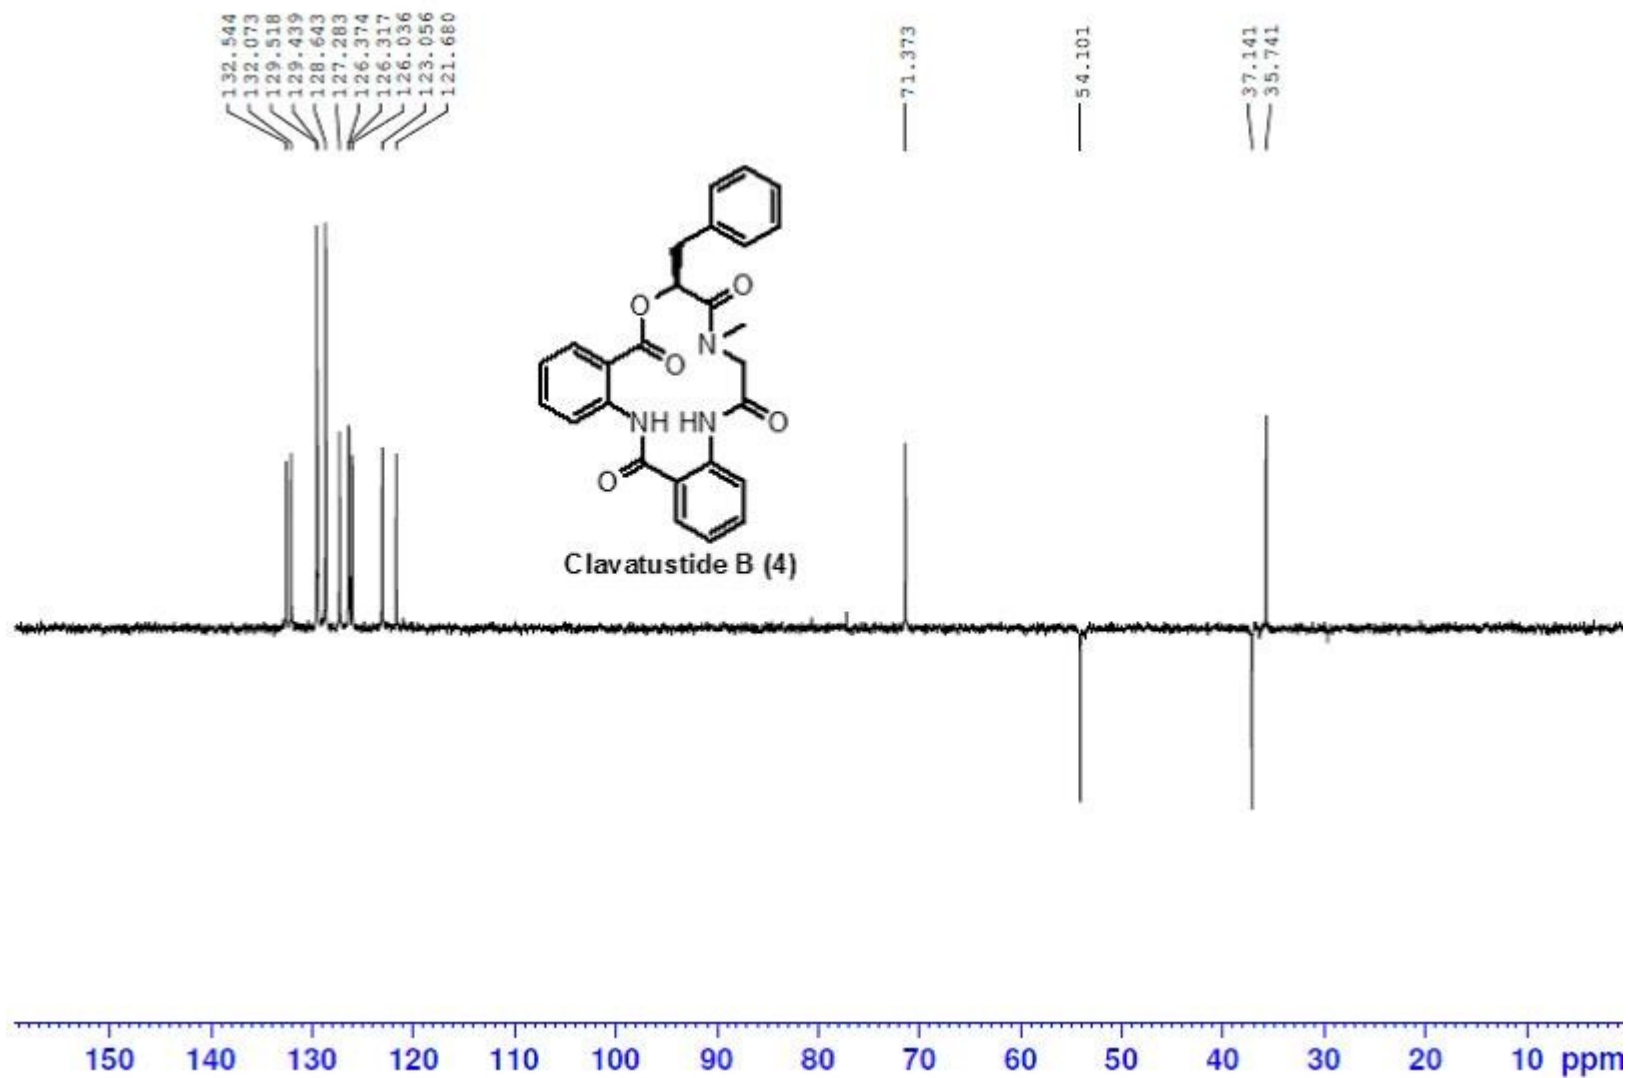

COSY NMR of Clavatustide B enantiomer (4) in CDCl<sub>3</sub>

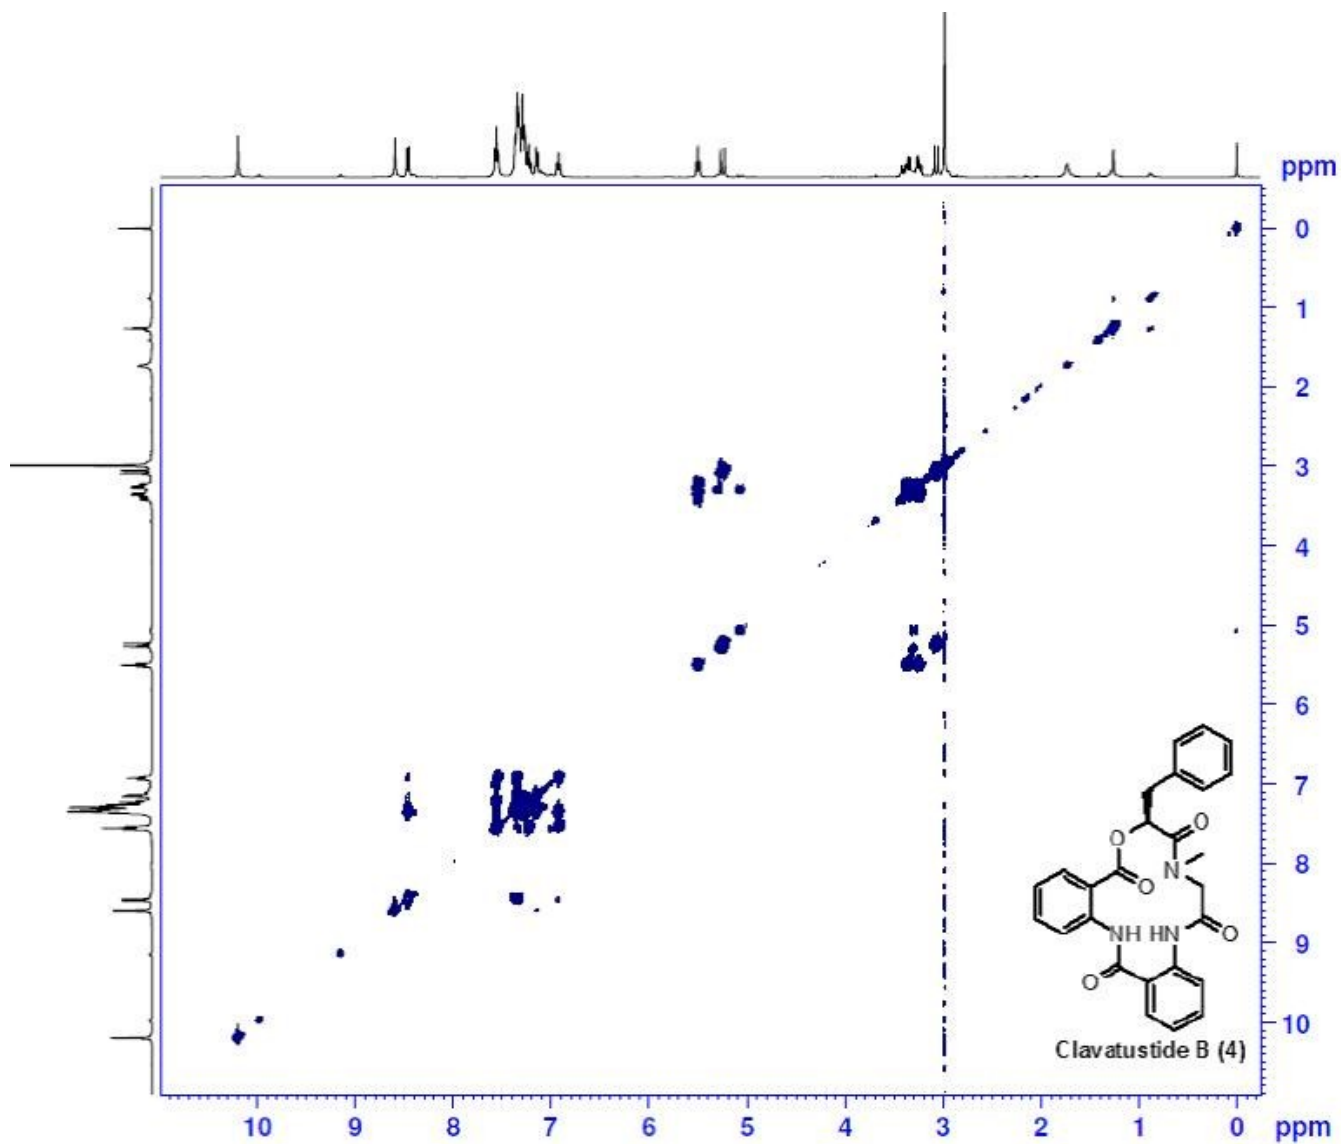

### HMBC NMR of Clavatustide B enantiomer (4) in CDCl<sub>3</sub>

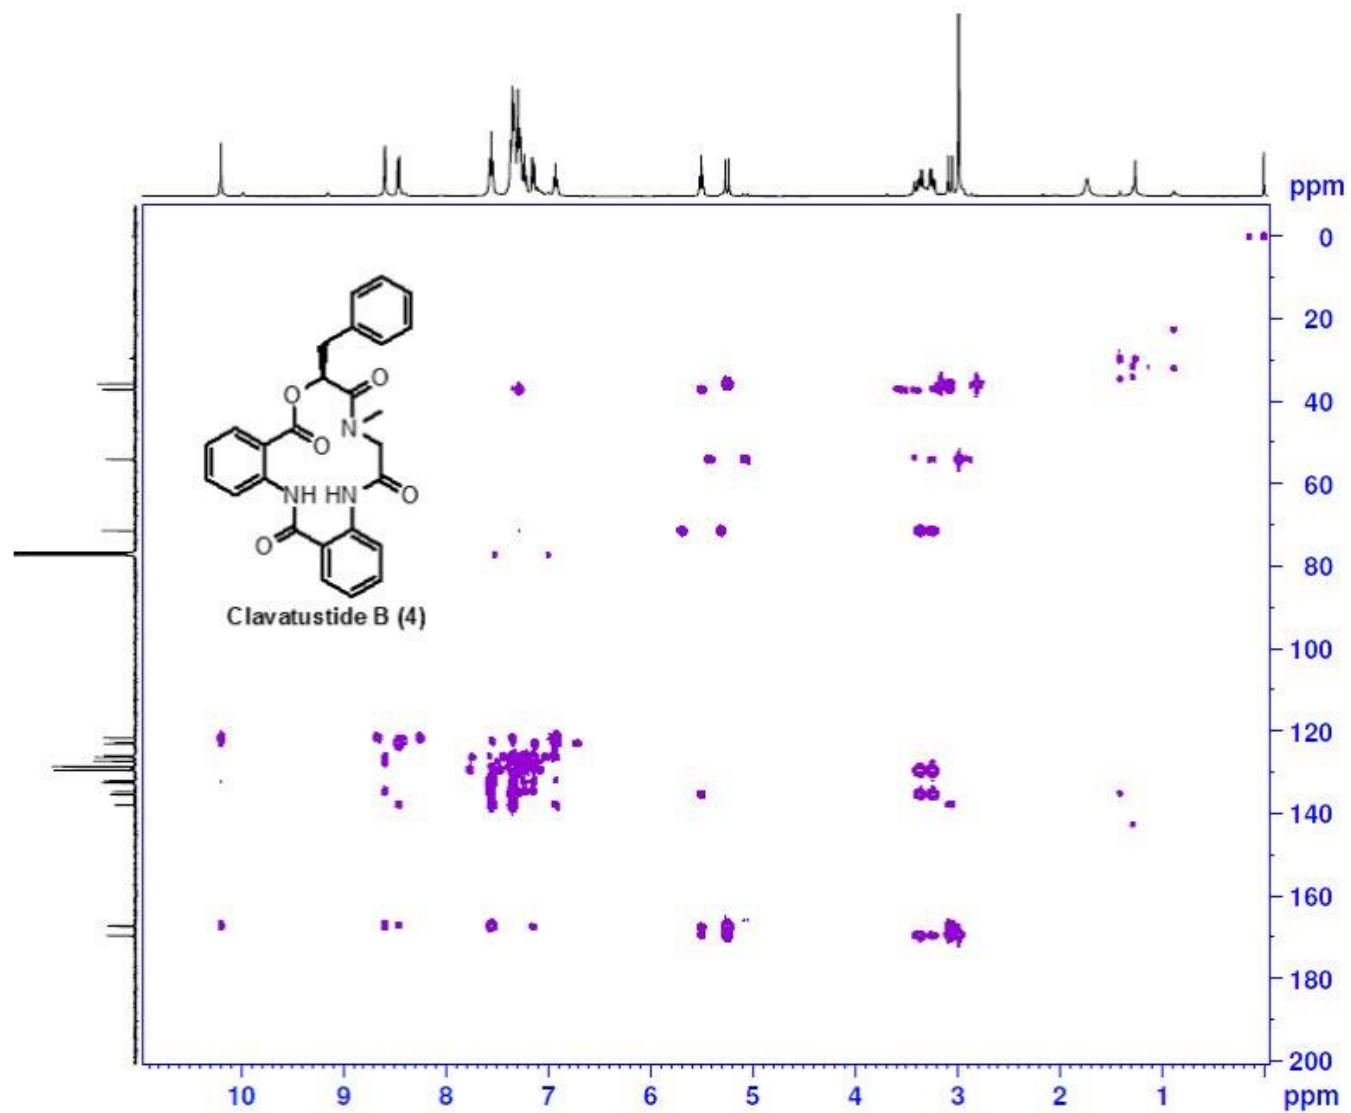

### HSQC NMR of Clavatuside B enantiomer (4) in CDCl<sub>3</sub>

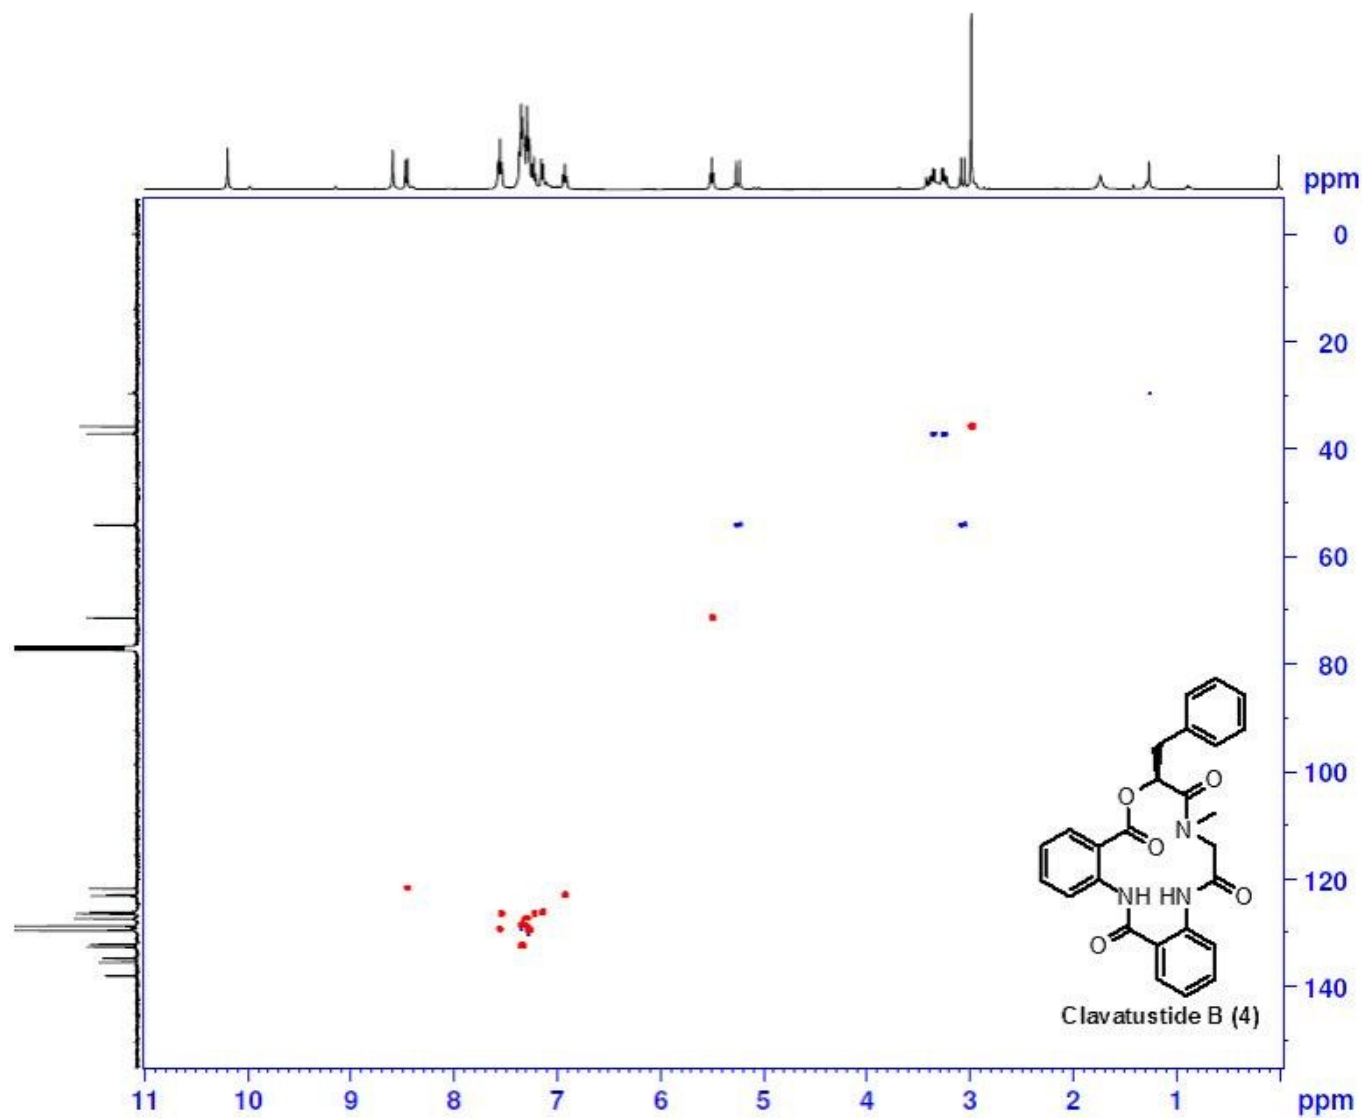

## HRMS of ClavatustideB enantiomer (4)

### Elemental Composition Report

Page 1

#### Single Mass Analysis (displaying only valid results)

Tolerance = 1000.0 PPM / DBE: min = -1.5, max = 50.0

Selected filters: None

Monoisotopic Mass, Even Electron Ions

19 formula(e) evaluated with 1 results within limits (up to 50 closest results for each mass)

Elements Used:

C: 0-26 H: 0-24 N: 0-3 O: 0-5

SAMPLE CODE: GVKP-SK-B1329-69-S-1

12082015-007-GVKP-SK-B1329-69-S-1 15 (0.509) AM (Top,4, Ar,5000.0,195.10,1.00,LS 10); Sm (Mn, 2x1.00); Sb (35,40.00)

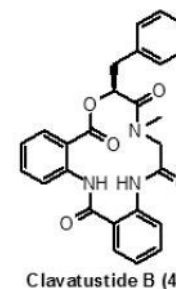

2: TOF MS ES+  
8.36e3

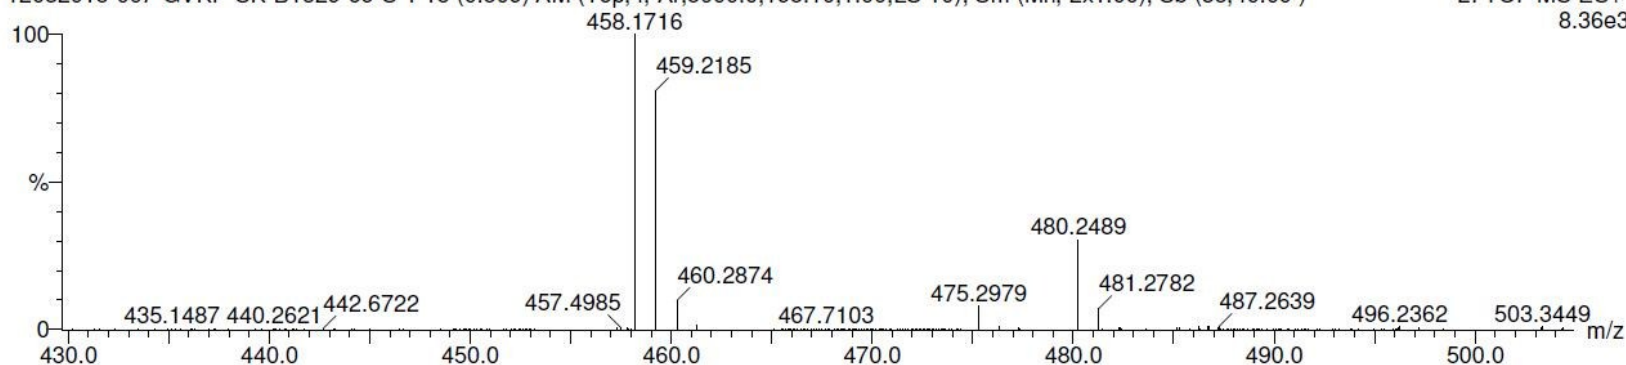

Minimum: -1.5  
Maximum: 5.0 1000.0 50.0

| Mass     | Calc. Mass | mDa | PPM | DBE  | i-FIT  | Formula                                                       |
|----------|------------|-----|-----|------|--------|---------------------------------------------------------------|
| 458.1716 | 458.1716   | 0.0 | 0.0 | 16.5 | 1508.8 | C <sub>26</sub> H <sub>24</sub> N <sub>3</sub> O <sub>5</sub> |

## Racemic of Clavatuside B (3) and B (4)

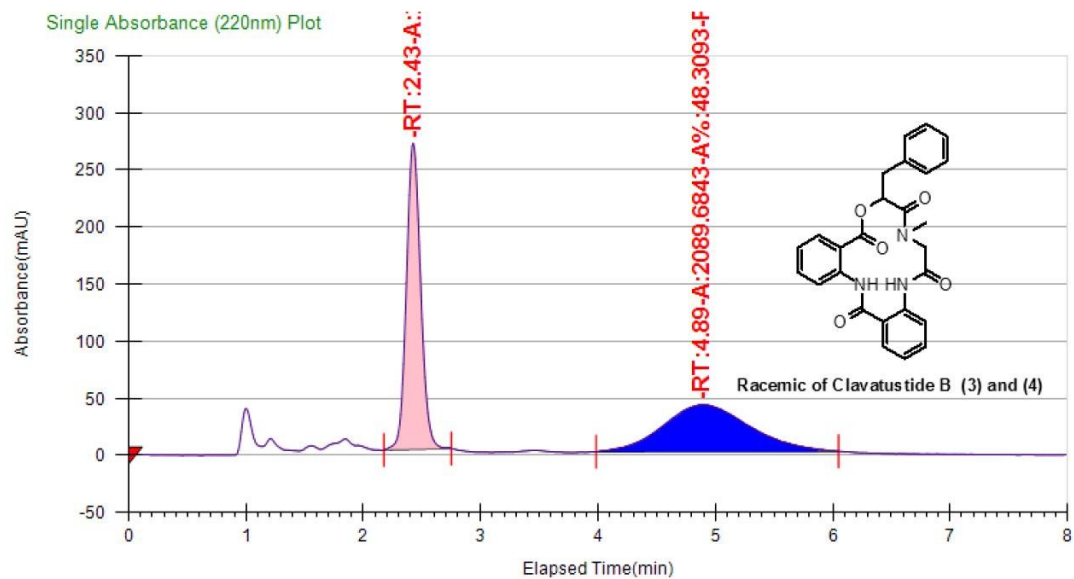

### General Information

| Log Author    | Log Date                 | Report By     | Report Date | Notes |
|---------------|--------------------------|---------------|-------------|-------|
| Administrator | 5/11/2015<br>10:30:56 PM | Administrator | 5/12/2015   |       |

### Run Information

| Instrument Method | Inj. Vol. | Solvent                 | Column                                 | Sample                        | Well Location | Temp. | Flow | % Modifier | Pressure |
|-------------------|-----------|-------------------------|----------------------------------------|-------------------------------|---------------|-------|------|------------|----------|
| 4g-40%-100bar     | 10        | 0.5% DEA in<br>METHANOL | CHIRALPAK<br>AS-H<br>(4.6*250)<br>mm5u | GVKP-SK-<br>B1329-117-<br>Rac | 11A           | 30.1  | 4    | 40         | 100      |

### Peak Information

| Peak No | % Area  | Area      | Ret. Time | Height   | Cap. Factor |
|---------|---------|-----------|-----------|----------|-------------|
| 1       | 51.6907 | 2235.9534 | 2.43 min  | 268.3872 | 0           |
| 2       | 48.3093 | 2089.6843 | 4.89 min  | 40.9265  | 0           |



## Chiral HPLC of Clavatustide B (3)

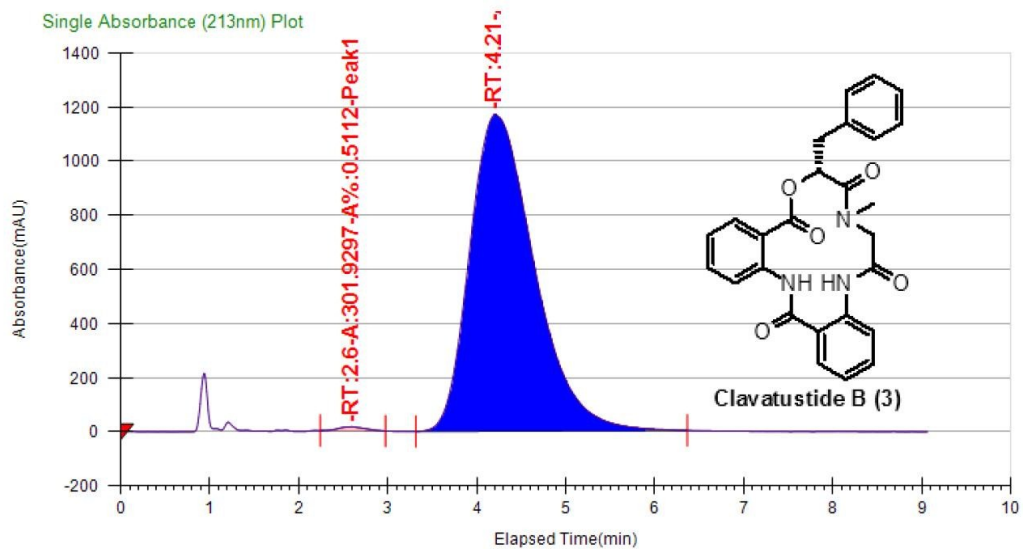

### General Information

| Log Author    | Log Date                | Report By     | Report Date | Notes |
|---------------|-------------------------|---------------|-------------|-------|
| Administrator | 6/11/2015<br>4:45:53 PM | Administrator | 6/11/2015   |       |

### Run Information

| Instrument Method | Inj. Vol. | Solvent                 | Column                                 | Sample                 | Well Location | Temp. | Flow | % Modifier | Pressure |
|-------------------|-----------|-------------------------|----------------------------------------|------------------------|---------------|-------|------|------------|----------|
| 4g-40%-100bar     | 10        | 0.5% DEA in<br>METHANOL | CHIRALPAK<br>AS-H<br>(4.6*250)<br>mm5u | GVKP-SK-<br>B1329-86-R | 23A           | 29.8  | 4    | 40         | 100      |

### Peak Information

| Peak No | % Area  | Area       | Ret. Time | Height    | Cap. Factor |
|---------|---------|------------|-----------|-----------|-------------|
| 1       | 0.5112  | 301.9297   | 2.6 min   | 14.7343   | 0           |
| 2       | 99.4888 | 58759.5428 | 4.21 min  | 1173.3261 | 0           |

## Chiral HPLC of Clavatustide B (4)

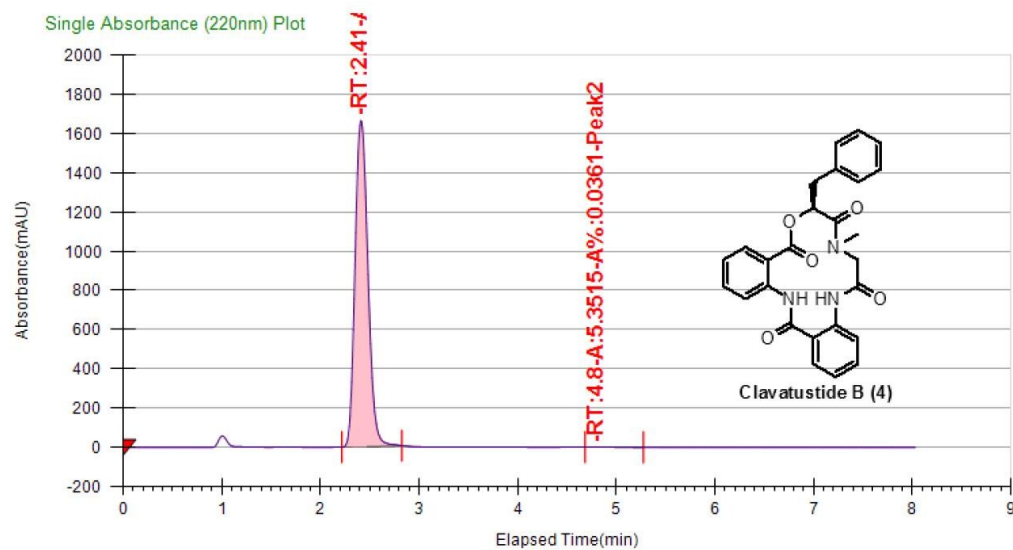

### General Information

| Log Author    | Log Date                 | Report By     | Report Date | Notes |
|---------------|--------------------------|---------------|-------------|-------|
| Administrator | 5/11/2015<br>10:40:14 PM | Administrator | 5/12/2015   |       |

### Run Information

| Instrument Method | Inj. Vol. | Solvent                 | Column                                 | Sample               | Well Location | Temp. | Flow | % Modifier | Pressure |
|-------------------|-----------|-------------------------|----------------------------------------|----------------------|---------------|-------|------|------------|----------|
| 4g-40%-100bar     | 10        | 0.5% DEA in<br>METHANOL | CHIRALPAK<br>AS-H<br>(4.6*250)<br>mm5u | GVKP-SK-<br>B1329-69 | 12A           | 29.9  | 4    | 40         | 100      |

### Peak Information

| Peak No | % Area  | Area       | Ret. Time | Height    | Cap. Factor |
|---------|---------|------------|-----------|-----------|-------------|
| 1       | 99.9639 | 14813.0936 | 2.41 min  | 1662.1207 | 0           |
| 2       | 0.0361  | 0.1922     | 4.8 min   | 0.1922    | 0           |
